# Supplementary material for: Design, Synthesis, and Evaluation of the COX-2 Inhibitory Activities of New 1,3-Dihydro-2H-indolin-2-one Derivatives
Source: MDPI journal article supplement (doi:10.3390/molecules28124668), 2023-06-09
Supplement: s1 [file s1]

## Supplementary information

### Design, Synthesis and Evaluation of the COX-2 Inhibitory Activities of New 1, 3-dihydro-2*H*-indolin-2-one Derivatives

| Table of contents                                                                              | Page No. |
|------------------------------------------------------------------------------------------------|----------|
| ( <i>Z</i> )-1-acetyl-6-(trifluoromethyl)-3-(3-(trifluoromethyl)benzylidene)indolin-2-one (4a) | 3        |
| ( <i>E</i> )-1-acetyl-6-(trifluoromethyl)-3-(3-(trifluoromethyl)benzylidene)indolin-2-one (4b) | 5        |
| 1-Acetyl-5-chloro-3-(3-(trifluoromethyl)benzylidene)indolin-2-one(4c)                          | 7        |
| 1-Acetyl-3-(3, 5-bis(trifluoromethyl)benzylidene)-6-chloroindolin-2-one (4d)                   | 9        |
| ( <i>E</i> )-1-acetyl-5-amino-3-(3-(trifluoromethyl)benzylidene)indolin-2-one (4e)             | 11       |
| ( <i>Z</i> )-1-acetyl-3-(3,5-bis(trifluoromethyl)benzylidene)-6-chloroindolin-2-one(4f)        | 13       |
| 1-Acetyl-3-benzylideneindolin-2-one (4g)                                                       | 15       |
| 1-Acetyl-6-chloro-3-(3-(trifluoromethyl)benzylidene)indolin-2-one(4h)                          | 17       |
| 1-Acetyl-6-chloro-3-(4-(trifluoromethyl)benzylidene)indolin-2-one(4i)                          | 19       |
| 1-Acetyl-3-(3-(trifluoromethyl)benzylidene)indolin-2-one(4j)                                   | 21       |
| 1-Acetyl-6-chloro-3-(2-(trifluoromethyl)benzylidene)indolin-2-one(4k)                          | 23       |
| 1-Acetyl-6-chloro-3-(4-chloro-3-(trifluoromethyl)benzylidene)indolin-2-one(4l)                 | 25       |
| 1-Acetyl-6-chloro-3-(4-chloro-3-fluorobenzylidene)indolin-2-one(4m)                            | 27       |
| 1-Acetyl-6-chloro-3-(2, 3-difluorobenzylidene)indolin-2-one(4n)                                | 29       |

|                                                                                                          |    |
|----------------------------------------------------------------------------------------------------------|----|
| 1-Acetyl-5-chloro-3-(3-chloro-2-fluorobenzylidene)indolin-2-one(4o).....                                 | 31 |
| 1-Acetyl-3-(3-chloro-2-fluorobenzylidene)-6-(trifluoromethyl)indolin-2-one (4p).....                     | 33 |
| 1-Acetyl-6-chloro-3-(3-chloro-2-fluorobenzylidene)indolin-2-one(4q).....                                 | 35 |
| 1-Acetyl-6-chloro-3-(3-methoxy-5-(trifluoromethyl)benzylidene)indolin-2-one(4r) ..                       | 37 |
| 1-Acetyl-6-chloro-3-(3-methoxybenzylidene)indolin-2-one(4s) .....                                        | 39 |
| Tert-butyl-6-chloro-2-oxo-3-(3-(trifluoromethyl)benzylidene)indoline-1-carboxylate(4t)<br>.....          | 41 |
| 1-Acetyl-6-chloro-3-(3-(trifluoromethoxy)benzylidene)indolin-2-one(4u) .....                             | 43 |
| 1-Acetyl-6-chloro-3-(pyridin-4-ylmethylene)indolin-2-one(4v) .....                                       | 45 |
| 1-Acetyl-6-chloro-3-((2-(trifluoromethyl)pyridin-4-yl)methylene)indolin-2-one(4w)                        | 47 |
| Tert-butyl 4-((1-acetyl-6-chloro-2-oxoindolin-3-ylidene)methyl)benzoate(4x) .....                        | 49 |
| nitro-N-(2-oxo-3-(3-(trifluoromethyl)benzylidene)indolin-5-yl)benzenesulfonamide(<br>9a) .....           | 53 |
| 2,4-Difluoro-N-(2-oxo-3-(3-(trifluoromethyl)benzylidene)indolin-5-yl)benzenesulfon<br>amide (9b).....    | 55 |
| N-(2-oxo-3-(3-(trifluoromethyl)benzylidene)indolin-5-yl)ethanesulfonamide (9c)....                       | 57 |
| 4-Nitro-N-(2-oxo-3-(3-(trifluoromethyl)benzylidene)indolin-5-yl)benzenesulfonamid<br>e (9d).....         | 51 |
| N-(2-oxo-3-(3-(trifluoromethyl)benzylidene)indolin-5-yl)-1-phenylmethanesulfonam<br>ide (9e) .....       | 59 |
| (Z)-4-methyl-N-(2-oxo-3-(3-(trifluoromethyl)benzylidene)indolin-5-yl)benzenesulfon<br>amide (9f) .....   | 61 |
| (E)-4-methyl-N-(2-oxo-3-(3-(trifluoromethyl)benzylidene)indolin-5-yl)benz-enesulfo<br>namide (9g). ..... | 63 |
| 5-((3,5-bis(trifluoromethyl)benzylidene)amino)indolin-2-one (9i).....                                    | 65 |
| 5-((3,5-bis(trifluoromethyl)benzylidene)amino)indolin-2-one (9i).....                                    | 67 |

## Relevant spectroscopic data ( $^1\text{H}$ , $^{13}\text{C}$ and HRMS Spectra)

### (Z)-1-acetyl-6-(trifluoromethyl)-3-(3-(trifluoromethyl)benzylidene)indolin-2-one (4a)

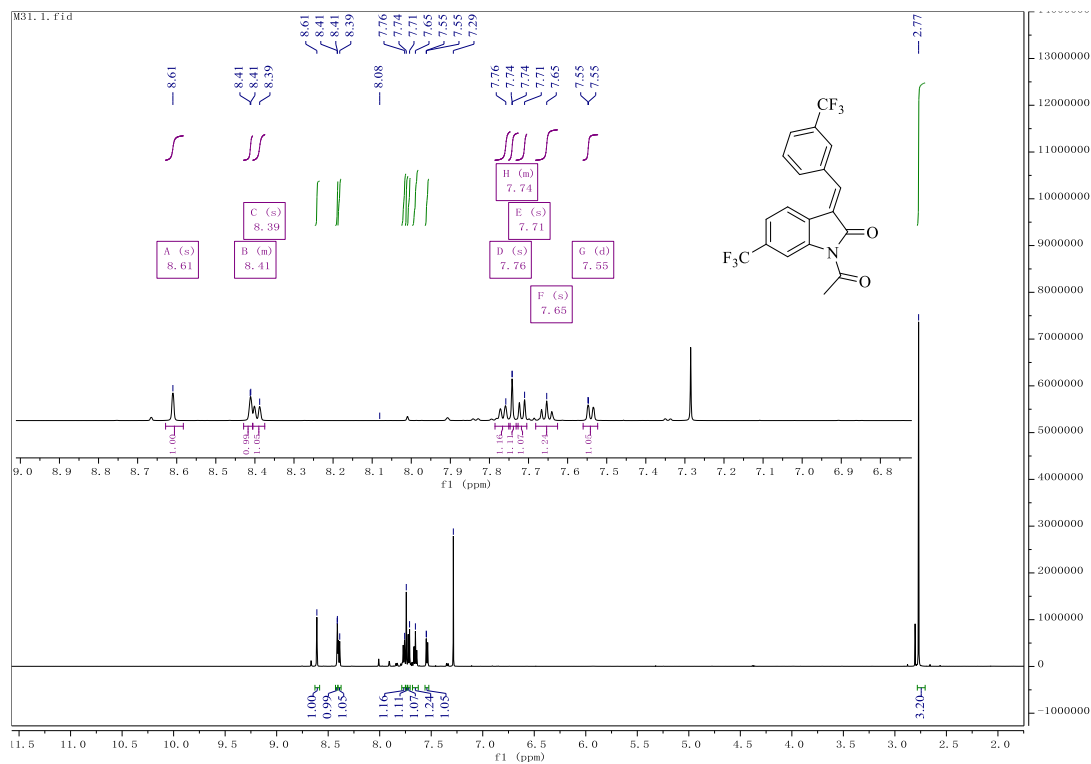

Figure S1-1.  $^1\text{H}$  NMR spectrum (600 Hz,  $\text{CDCl}_3$ ) of compound 4a

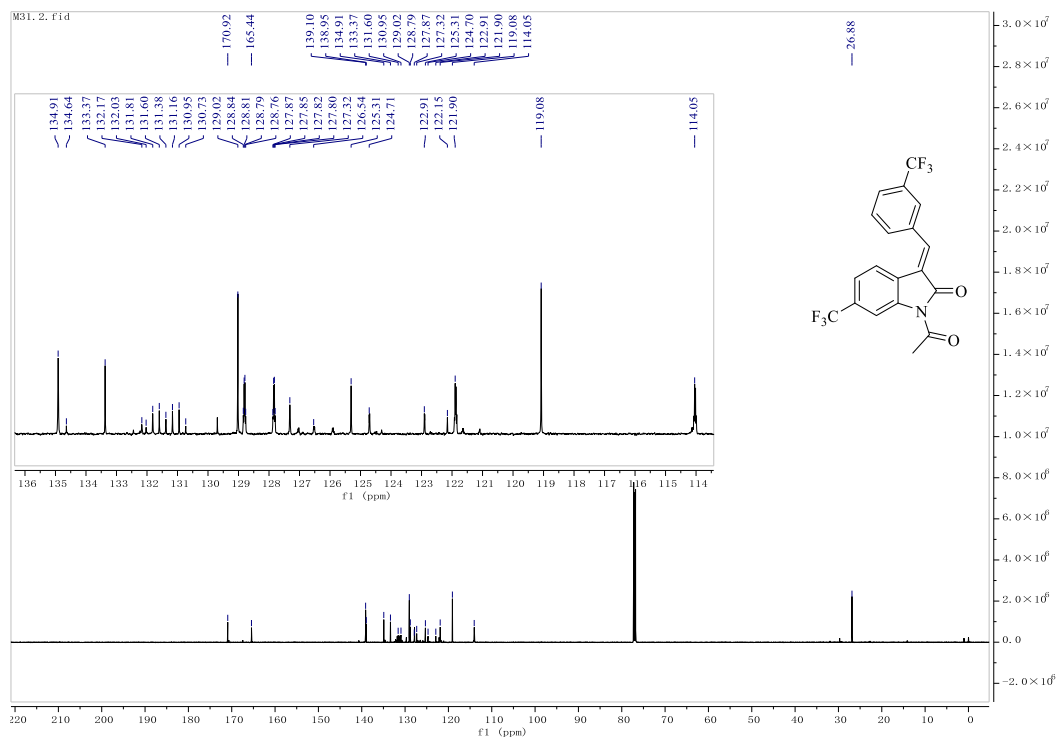

Figure S1-2.  $^{13}\text{C}$  NMR spectrum (150 Hz,  $\text{CDCl}_3$ ) of compound 4a

M31 #23 RT: 0.10 AV: 1 NL: 8.40E7  
T: FTMS + p ESI Full ms [100.0000-1500.0000]

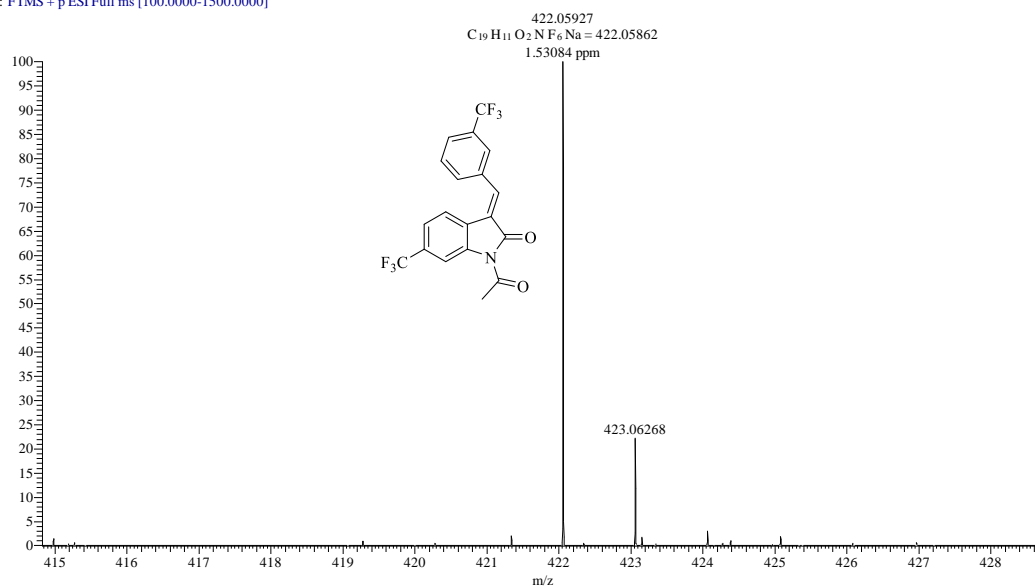

Figure S1-3. HRMS of compound 4a



**(E)-1-acetyl-6-(trifluoromethyl)-3-(3-(trifluoromethyl)benzylidene)indolin-2-one (4b)**

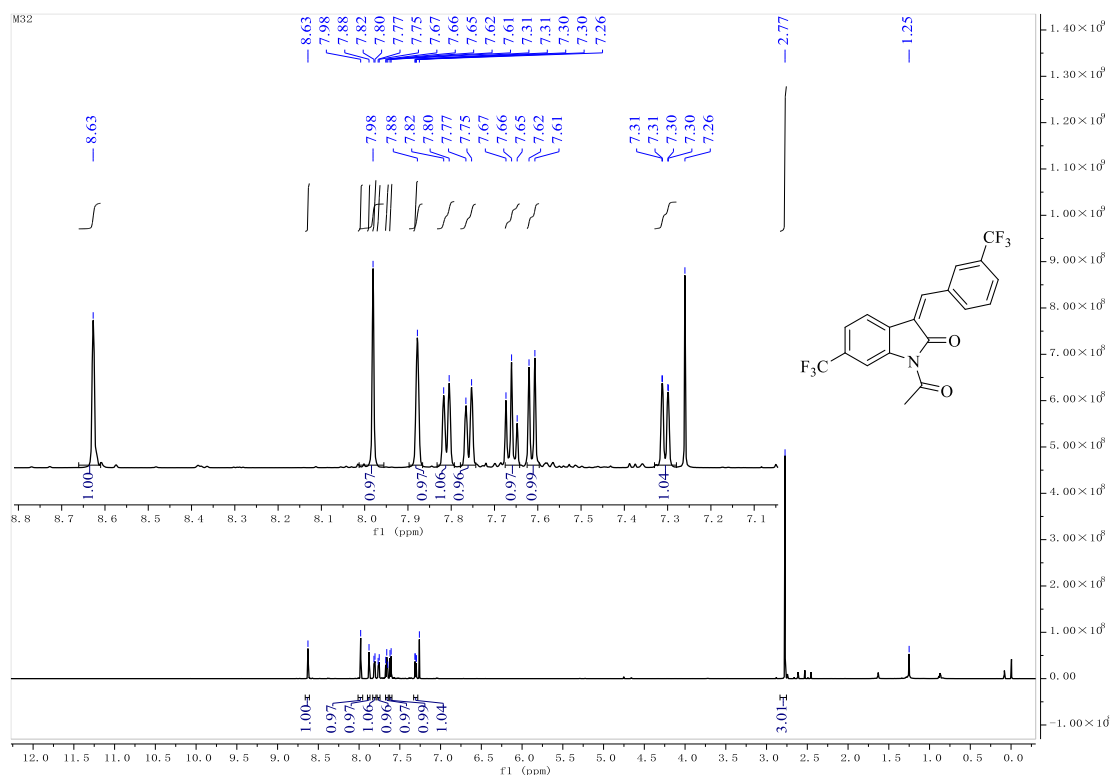

**Figure S2-1.** <sup>1</sup>H NMR spectrum (600 Hz, CDCl<sub>3</sub>) of compound **4b**

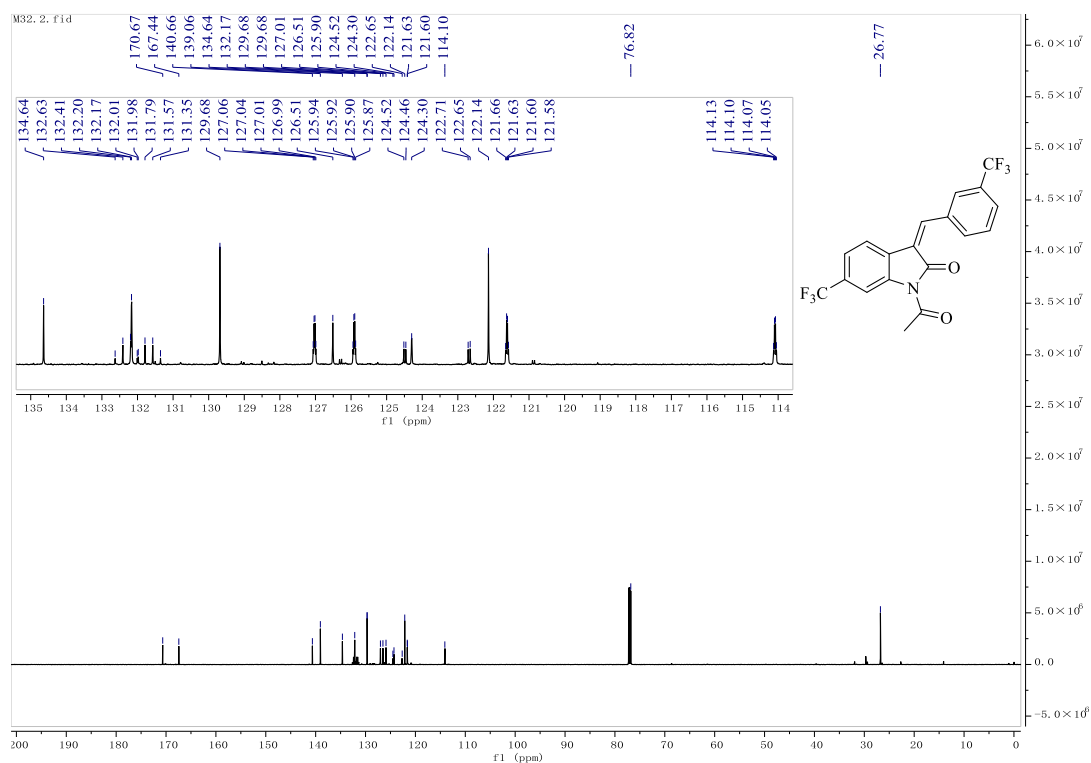

**Figure S2-2.** <sup>13</sup>C NMR spectrum (150 Hz, CDCl<sub>3</sub>) of compound **4b**

M32 #23 RT: 0.10 AV: 1 NL: 4.67E7  
T: FTMS + p ESI Full ms [100.0000-1500.0000]

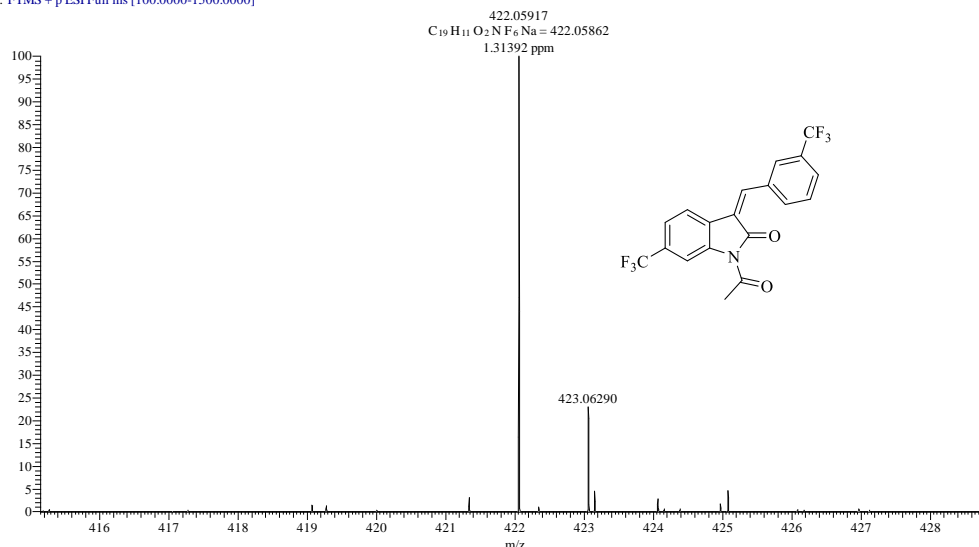

Figure S2-3. HRMS of compound **4b**

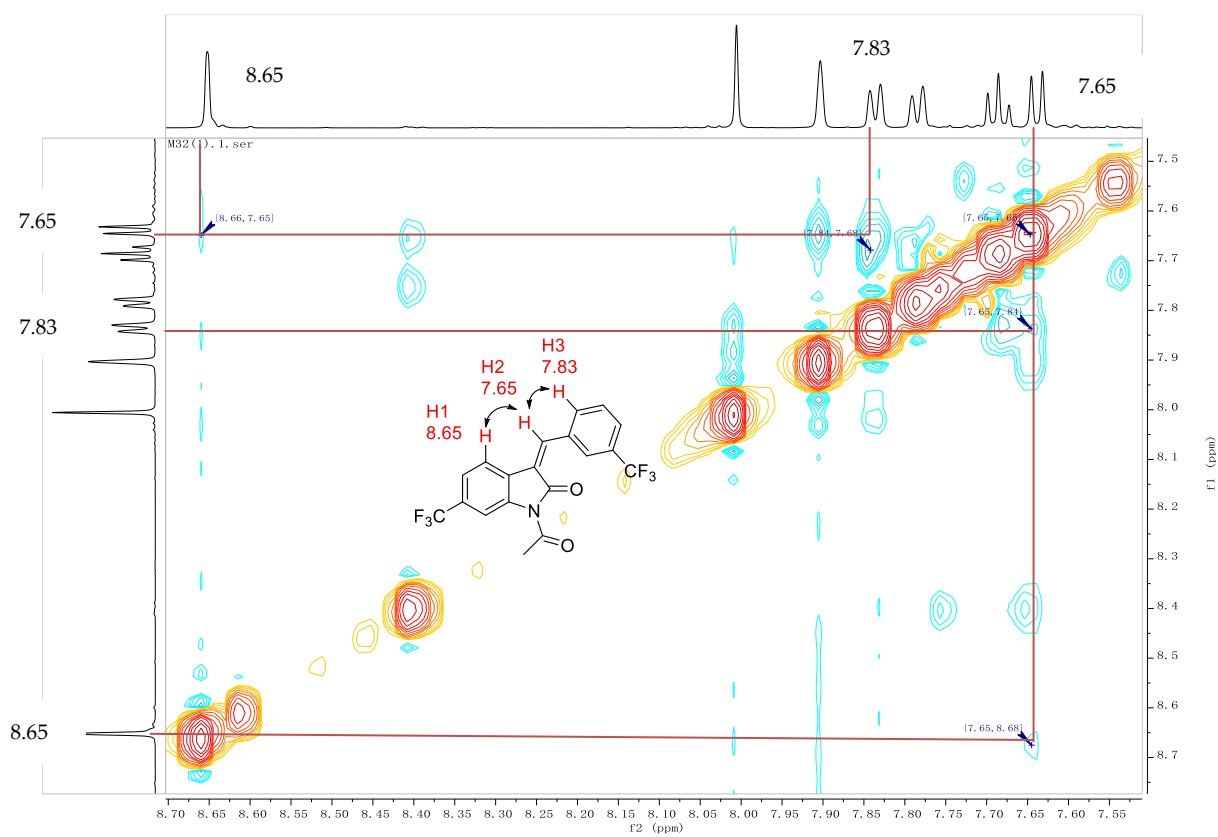

Figure S3-4. 2D-NOEY spectrum (600 Hz,  $\text{CDCl}_3$ ) of compound **4b**

**1-Acetyl-5-chloro-3-(3-(trifluoromethyl)benzylidene)indolin-2-one(4c)**

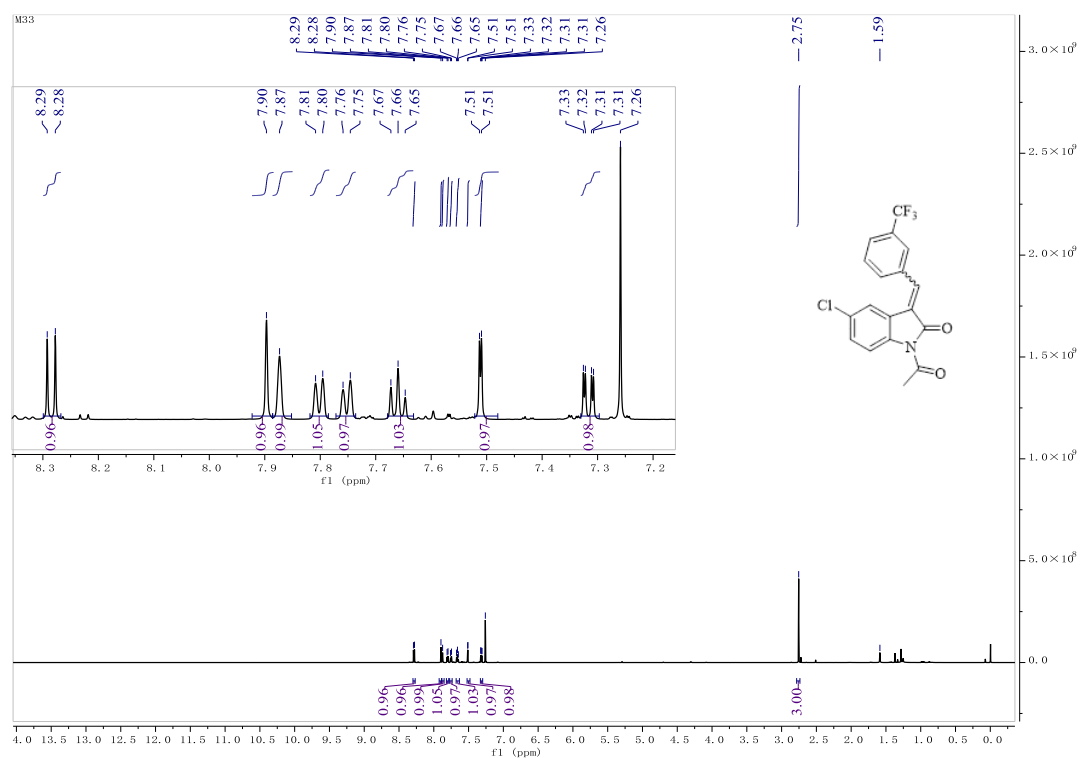

**Figure S3-1.** <sup>1</sup>H, NMR spectrum (600 Hz, CDCl<sub>3</sub>) of compound 4c

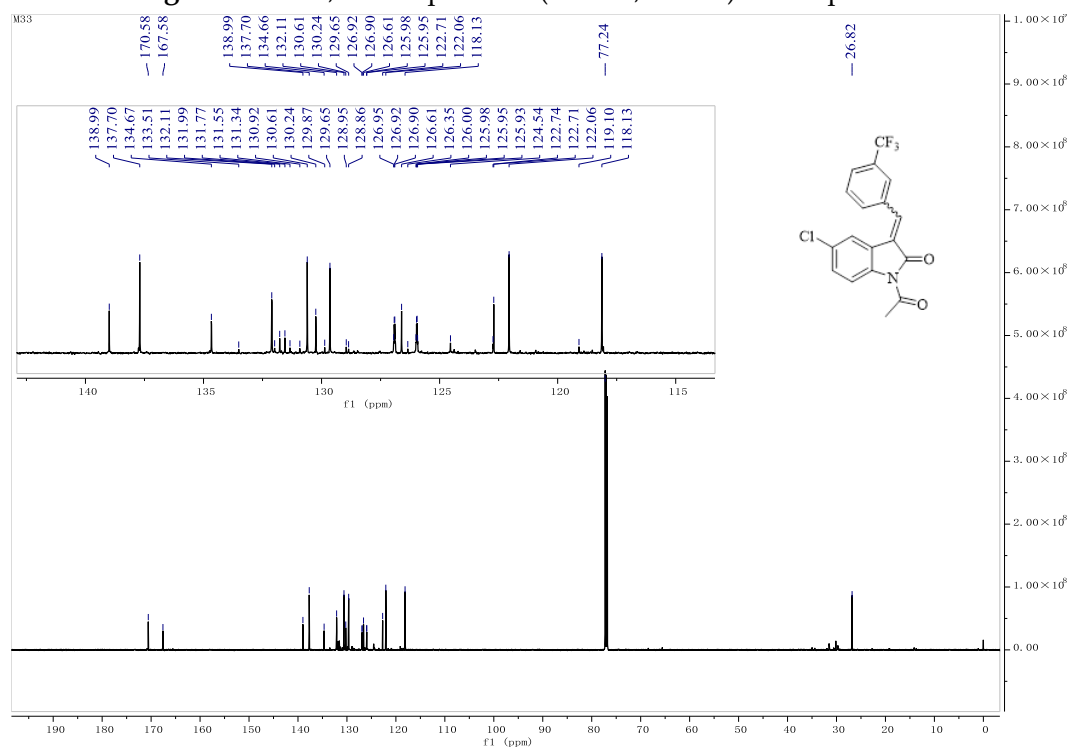

**Figure S3-2.** <sup>13</sup>C NMR spectrum (150 Hz, CDCl<sub>3</sub>) of compound 4c

M33 #32 RT: 0.14 AV: 1 NL: 4.86E5  
T: FTMS + p ESI Full ms [100.0000-1500.0000]

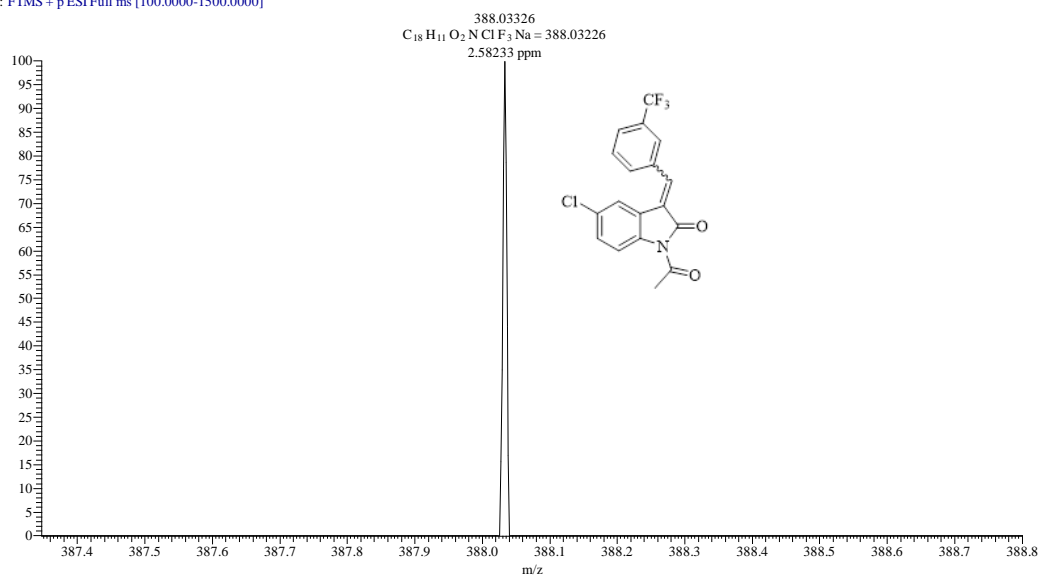

Figure S3-3. HRMS of compound 4c

**1-Acetyl-3-(3, 5-bis(trifluoromethyl)benzylidene)-6-chloroindolin-2-one (4d)**

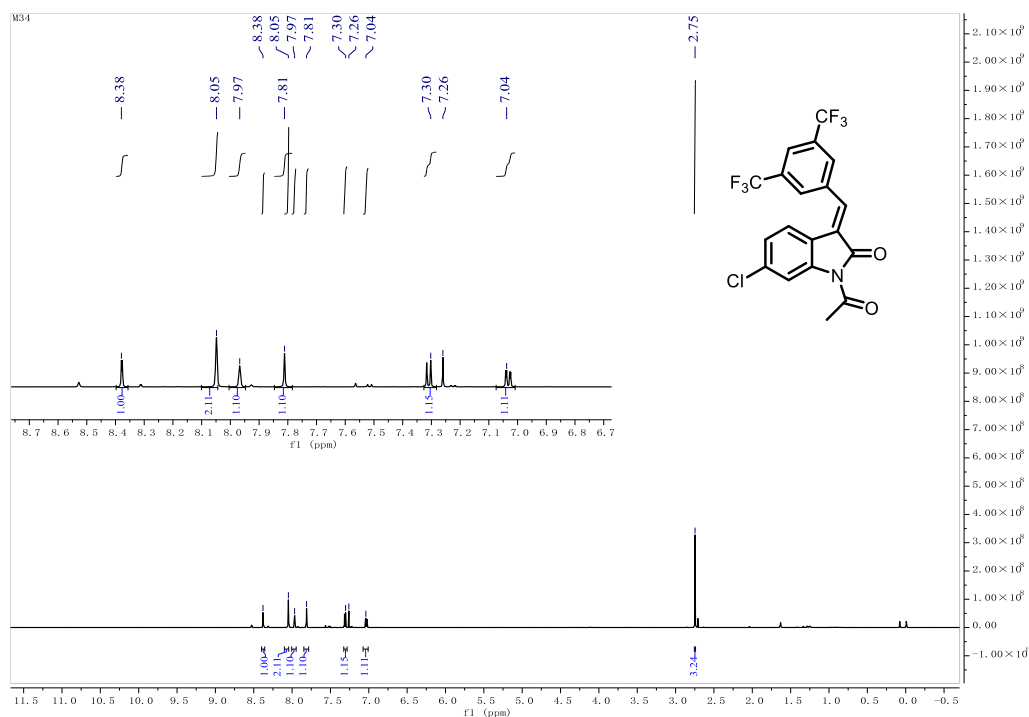

**Figure S4-1.** <sup>1</sup>H, NMR spectrum (600 Hz, CDCl<sub>3</sub>) of compound **4d**

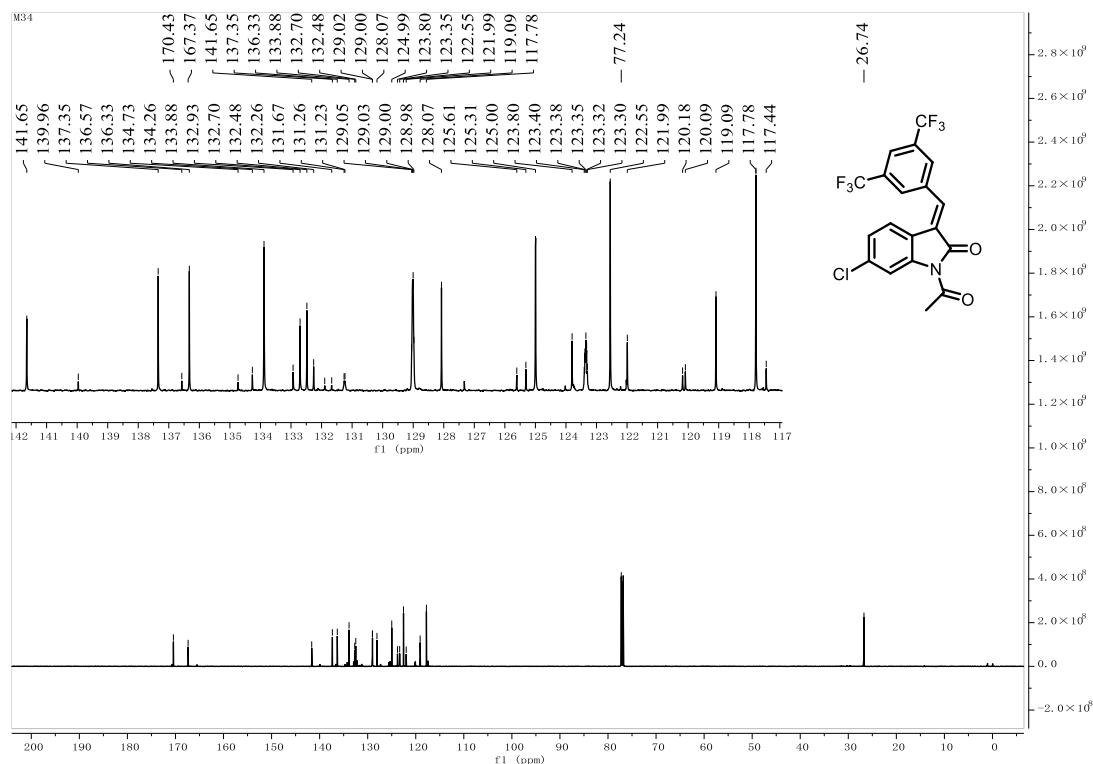

**Figure S4-2.** <sup>13</sup>C NMR spectrum (150 MHz, CDCl<sub>3</sub>) of compound **4d**

M34 #22 RT: 0.10 AV: 1 NL: 1.53E6  
T: FTMS + p ESI Full ms [100.0000-1500.0000]

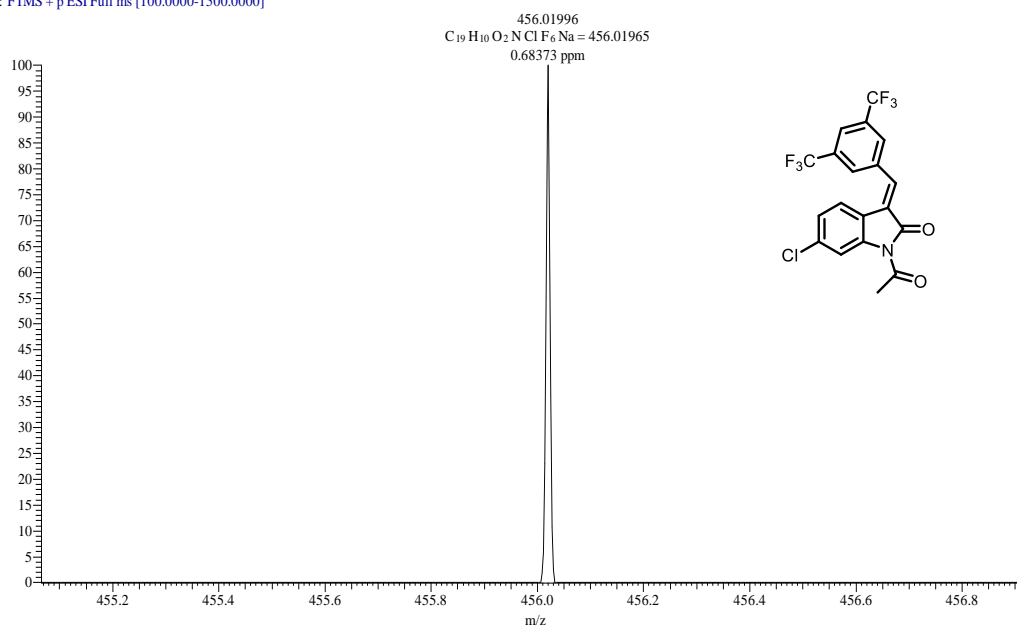

Figure S4-3. HRMS of compound 4d

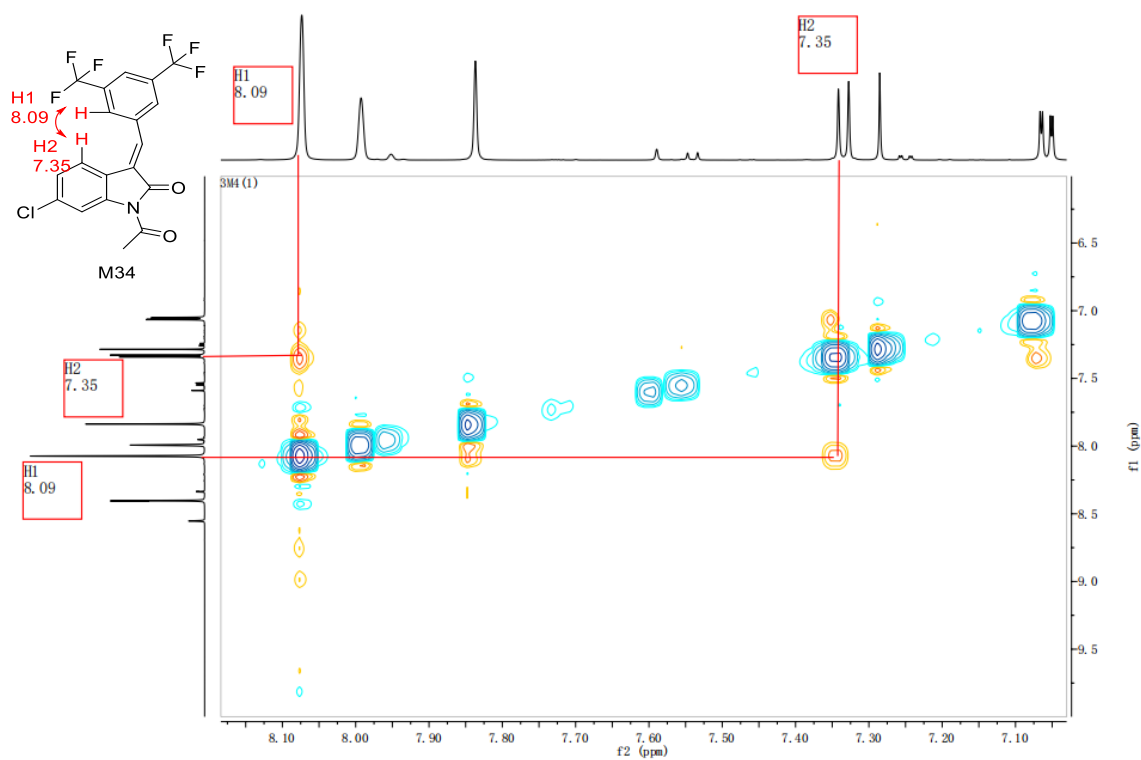

Figure S4-4. 2D-NOEY spectrum (600 Hz,  $CDCl_3$ ) of compound 4d

**(E)-1-acetyl-5-amino-3-(3-(trifluoromethyl)benzylidene)indolin-2-one (4e)**

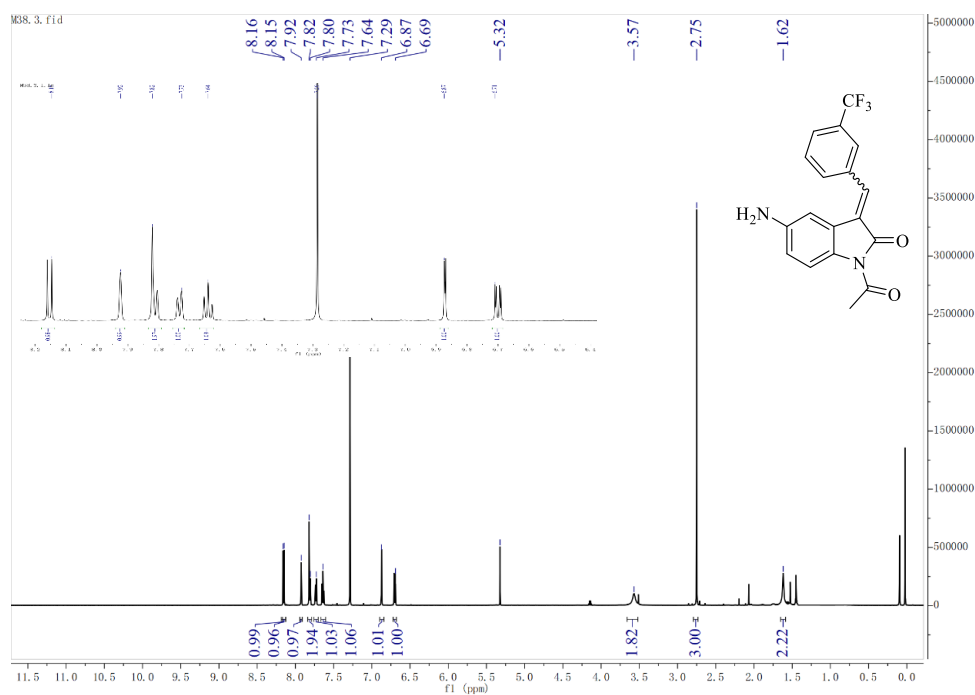

**Figure S5-1.** <sup>1</sup>H NMR spectrum (600 Hz, CDCl<sub>3</sub>) of compound **4e**

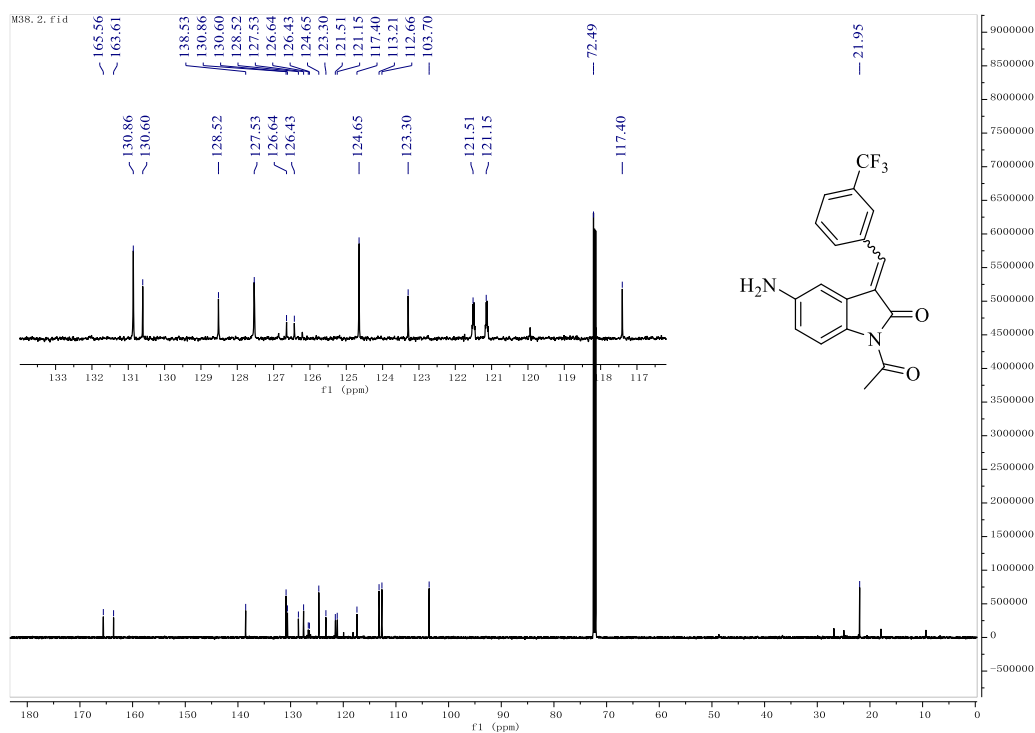

**Figure S5-2.** <sup>1</sup>H, <sup>13</sup>C NMR spectrum (150 Hz, DMSO) of compound **4e**

M38 #22 RT: 0.10 AV: 1 NL: 5.99E7  
T: FTMS + p ESI Full ms [100.0000-1500.0000]

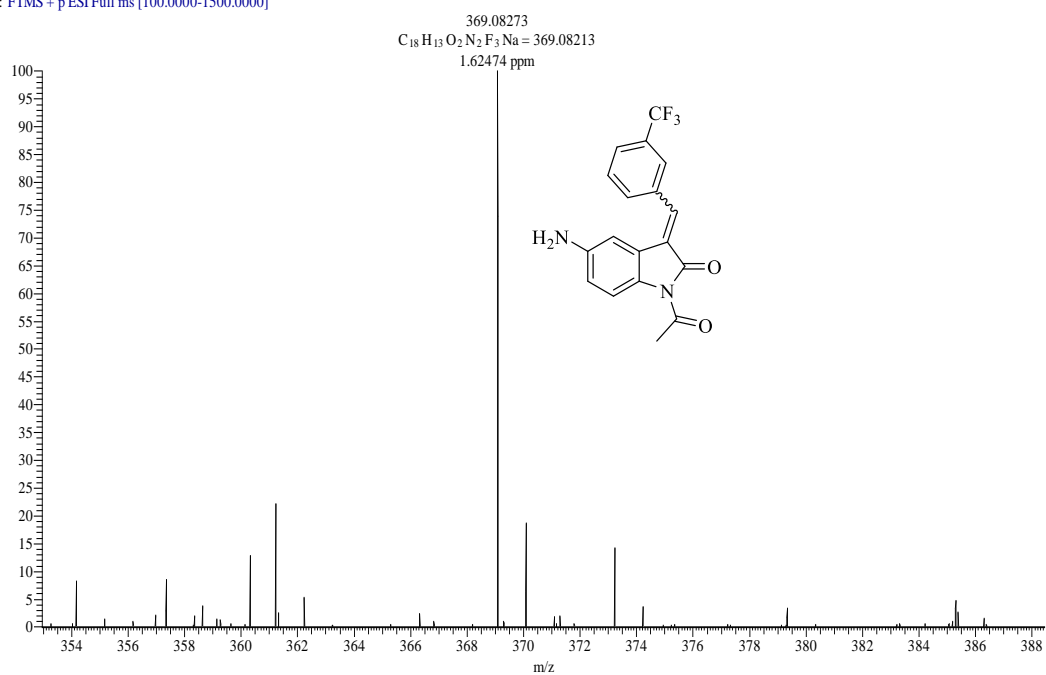

Figure S5-3. HRMS of compound 4e



**(Z)-1-acetyl-3-(3,5-bis(trifluoromethyl)benzylidene)-6-chloroindolin-2-one(4f)**

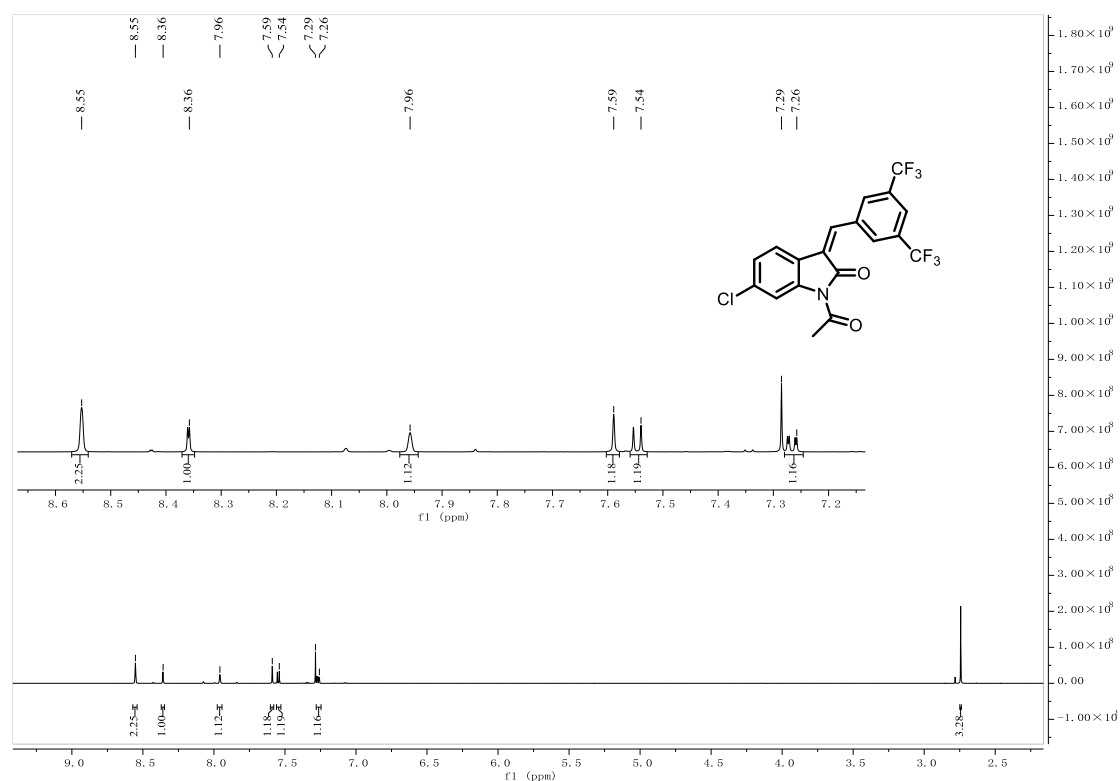

**Figure S6-1.** <sup>1</sup>H NMR spectrum (600 Hz, CDCl<sub>3</sub>) of compound 4f

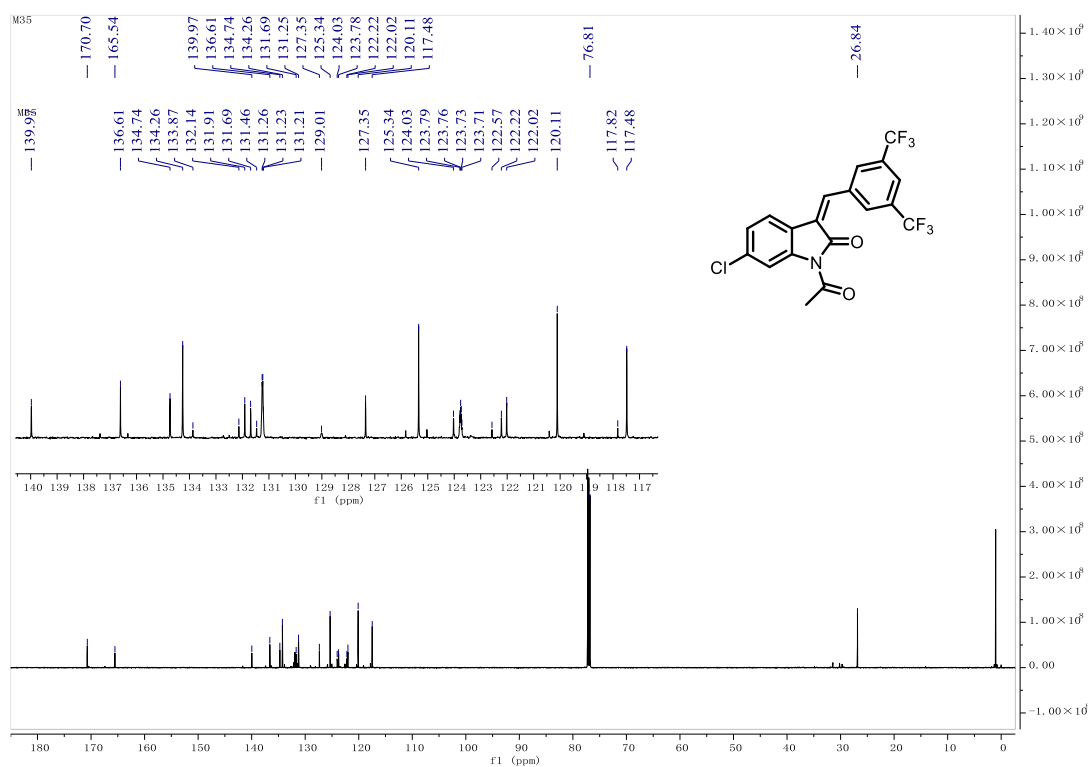

**Figure S6-2.** <sup>1</sup>H, <sup>13</sup>C NMR spectrum (600 Hz, 150 Hz, CDCl<sub>3</sub>) of compound 4f

M35 #25 RT: 0.11 AV: 1 NL: 3.18E6  
T: FTMS + p ESI Full ms [100.0000-1500.0000]

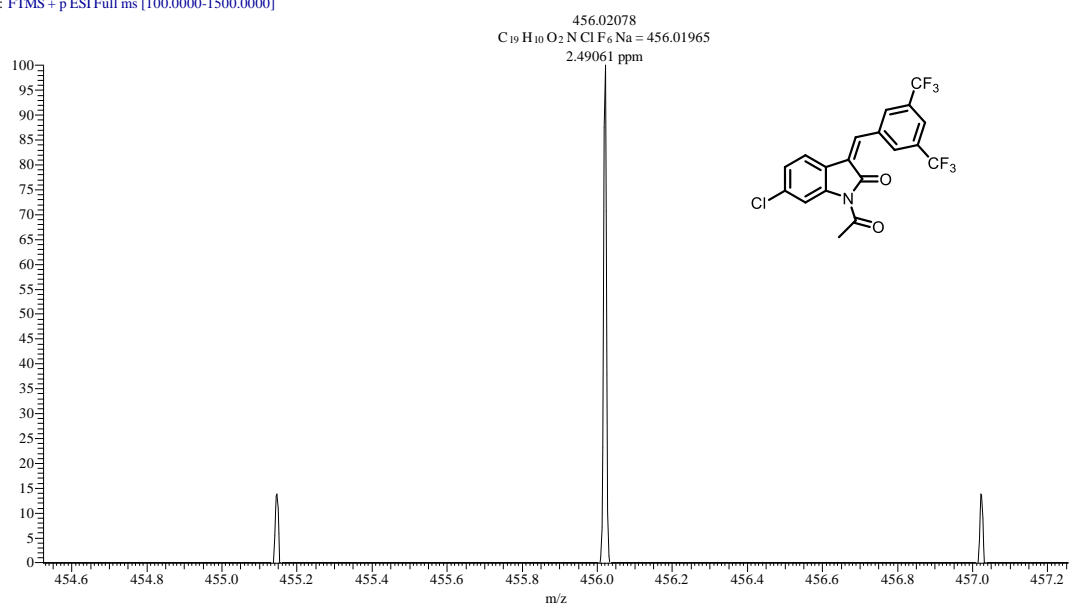

Figure S6-3. HRMS of compound 4f

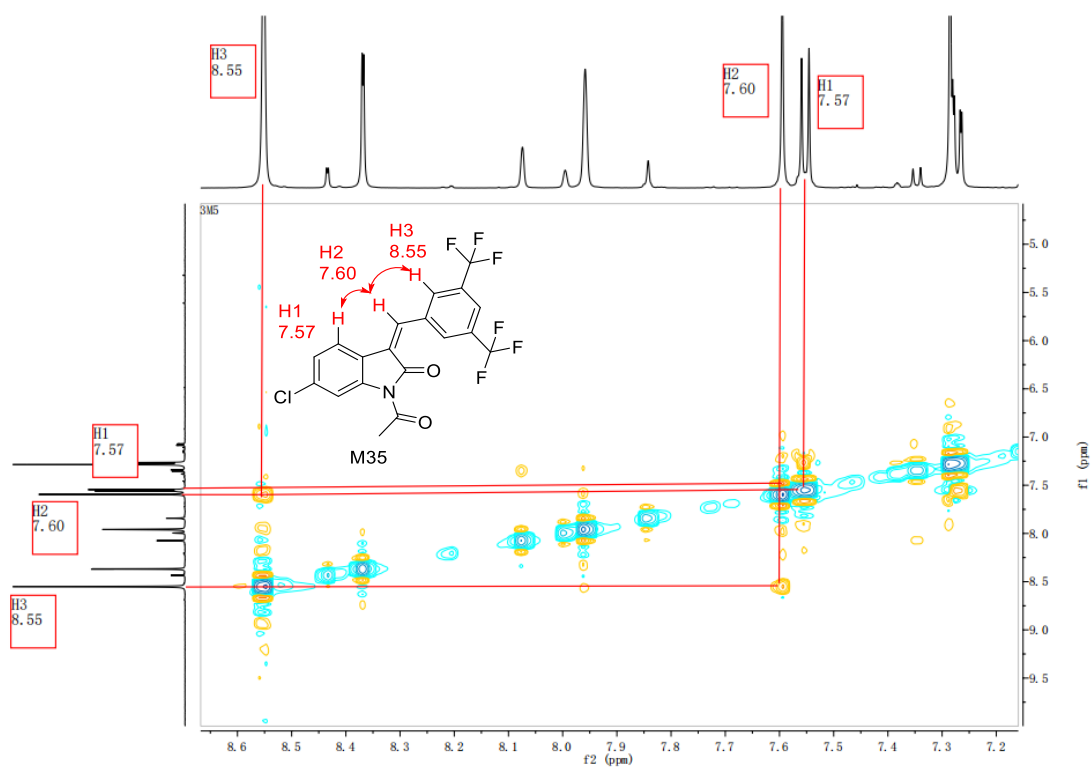

Figure S6-4. 2D-NOESY spectrum (600 Hz, CDCl<sub>3</sub>) of compound 4f

# 1-Acetyl-3-benzylideneindolin-2-one (4g)

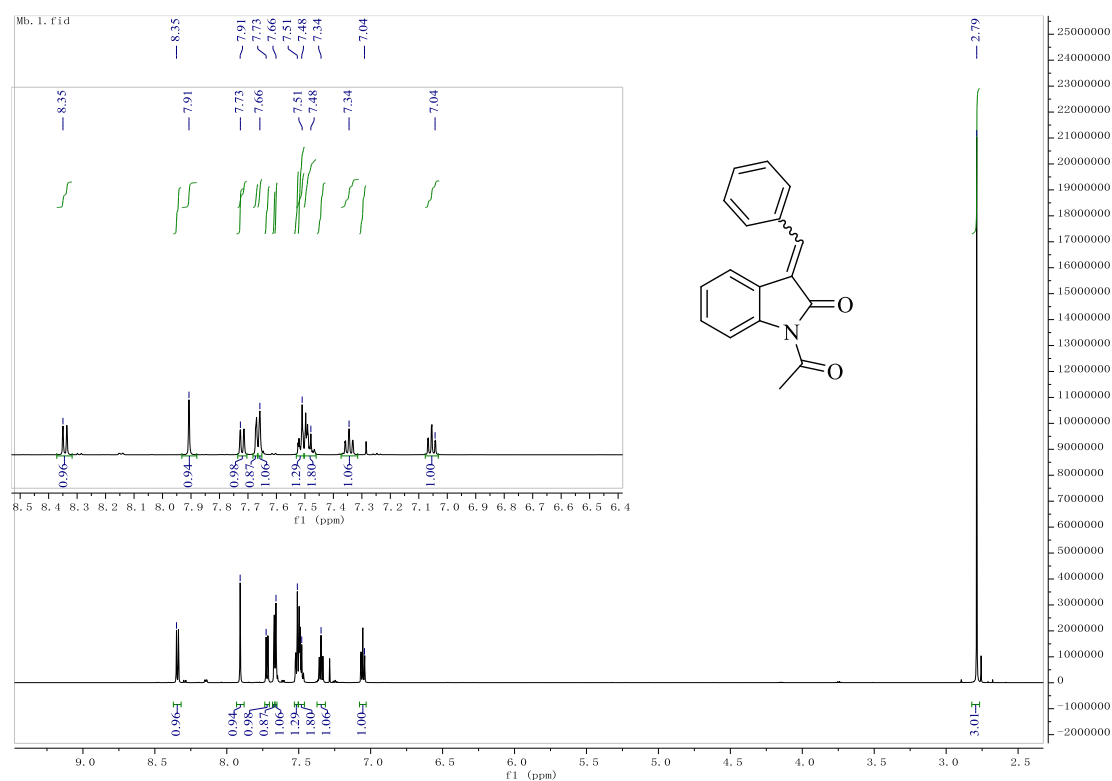

Figure S7-1.  $^1\text{H}$  NMR spectrum (600 Hz,  $\text{CDCl}_3$ ) of compound 4g

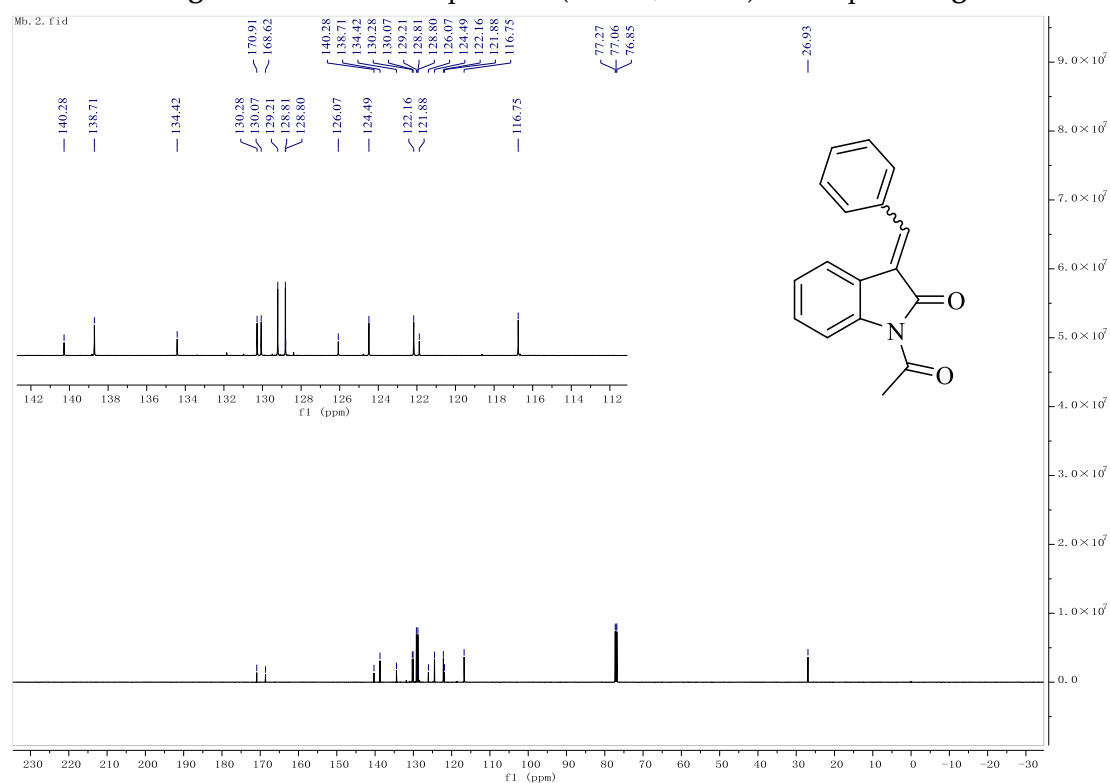

Figure S7-2.  $^{13}\text{C}$  NMR spectrum (150 Hz,  $\text{CDCl}_3$ ) of compound 4g

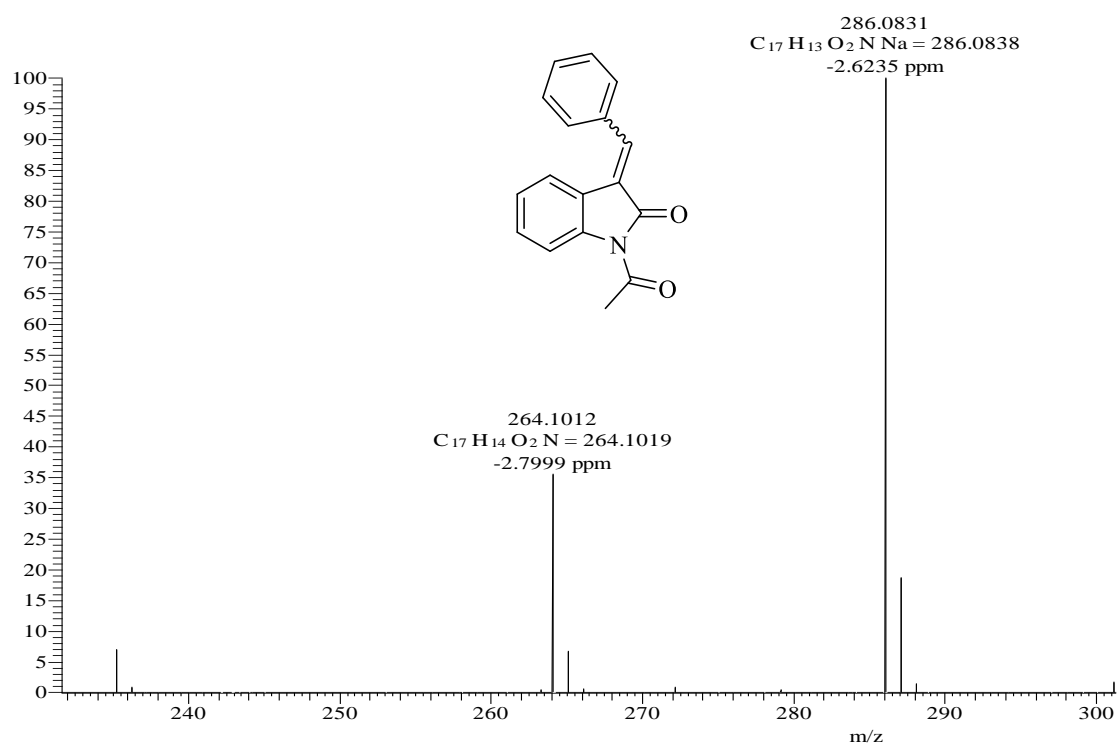

Figure S7-3. HRMS of compound 4g

**1-Acetyl-6-chloro-3-(3-(trifluoromethyl)benzylidene)indolin-2-one(4h)**

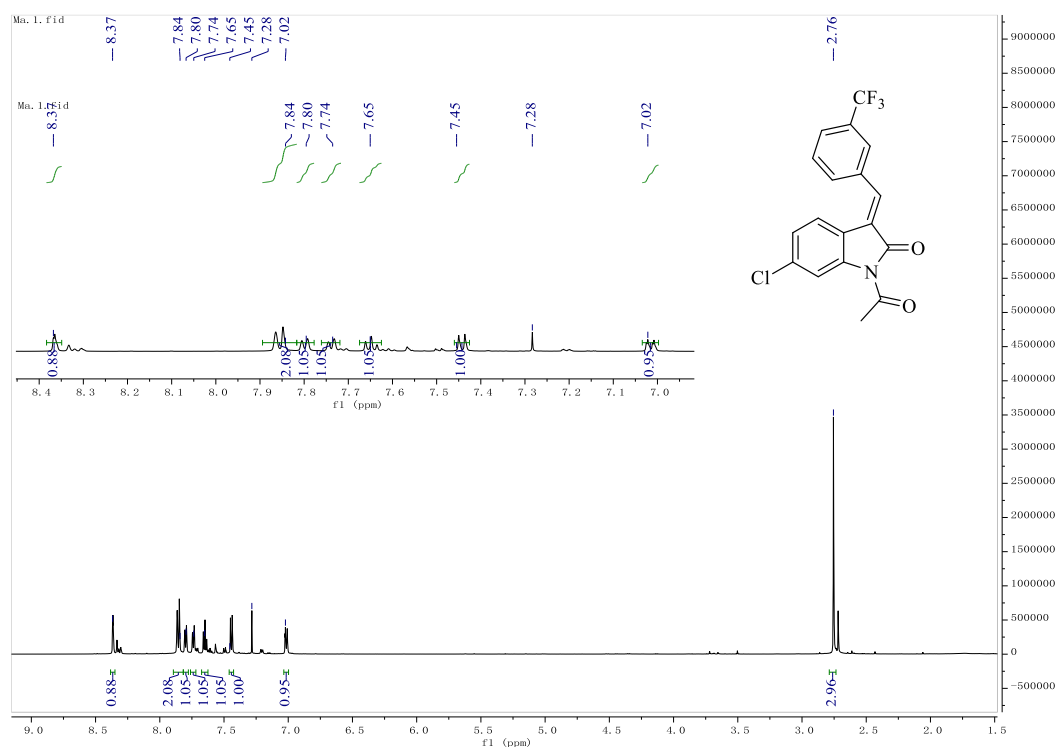

**Figure S8-1. <sup>1</sup>H NMR spectrum (600 Hz, CDCl<sub>3</sub>) of compound 4h**

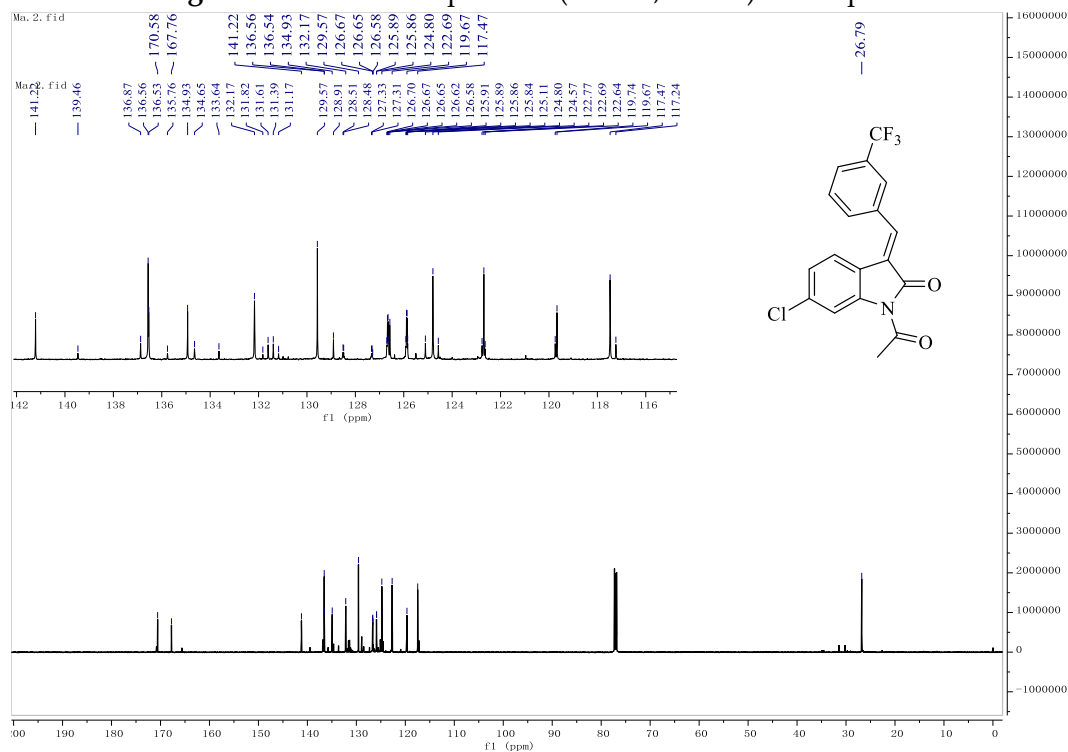

**Figure S8-1. <sup>13</sup>C NMR spectrum (150 Hz, CDCl<sub>3</sub>) of compound 4h**

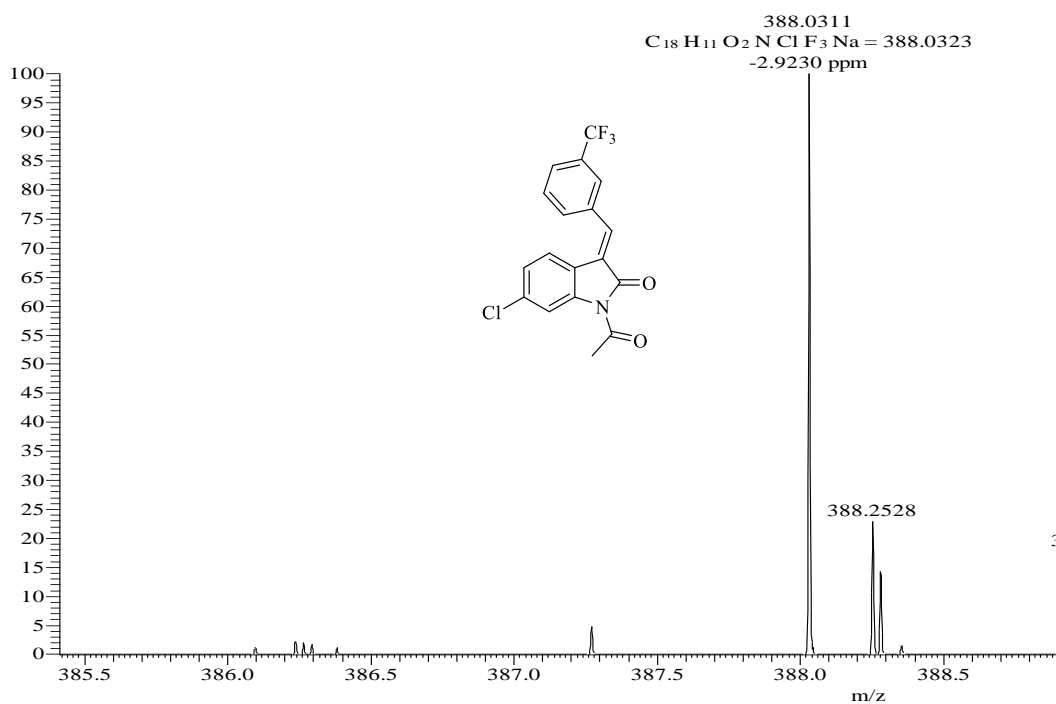

Figure S8-3. HRMS of compound 4h

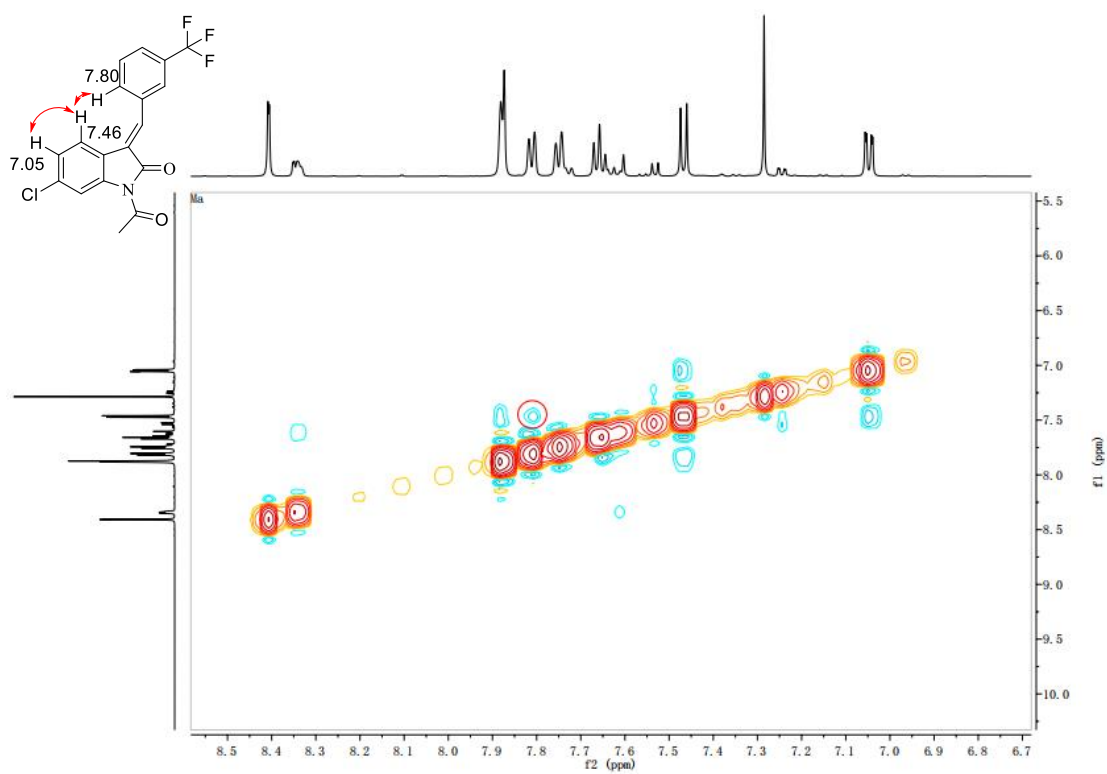

Figure S8-4. 2D-NOEY spectrum (600 Hz, CDCl<sub>3</sub>) of compound 4h

**1-Acetyl-6-chloro-3-(4-(trifluoromethyl)benzylidene)indolin-2-one(4i)**

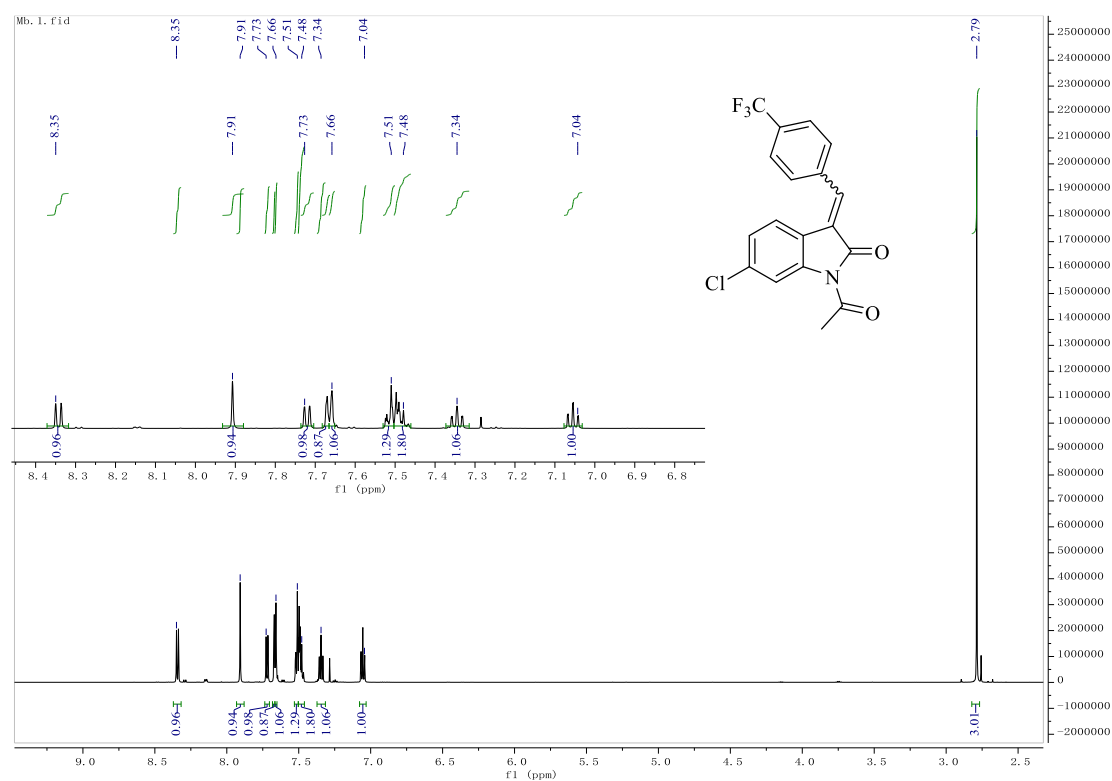

**Figure S9-1.** <sup>1</sup>H NMR spectrum (600 MHz, CDCl<sub>3</sub>) of compound **4i**

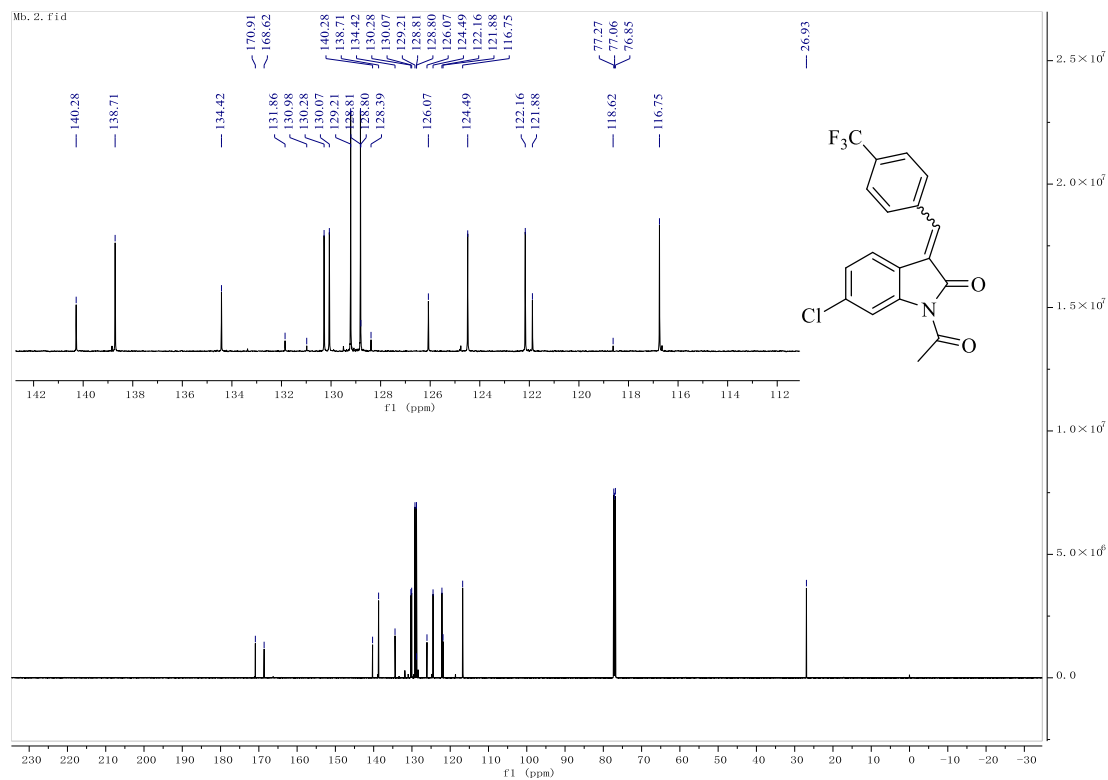

**Figure S9-2.** <sup>13</sup>C NMR spectrum (150 MHz, CDCl<sub>3</sub>) of compound **4i**

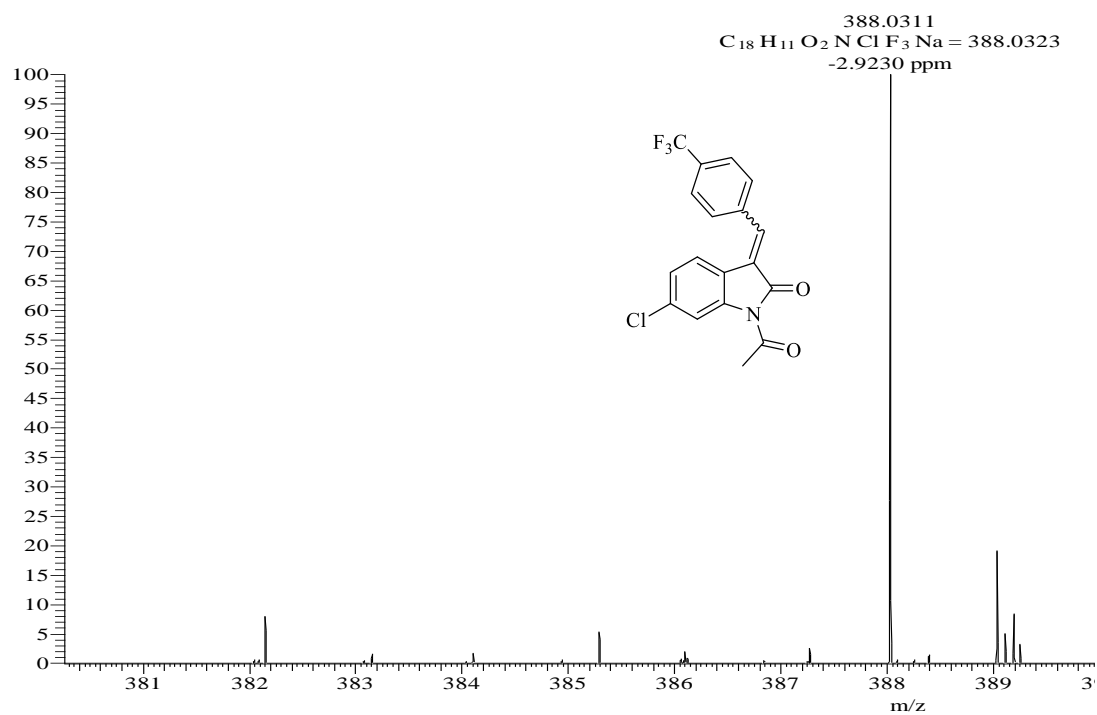

Figure S9-3. HRMS of compound **4i**



# **1-Acetyl-3-(3-(trifluoromethyl)benzylidene)indolin-2-one(4j)**

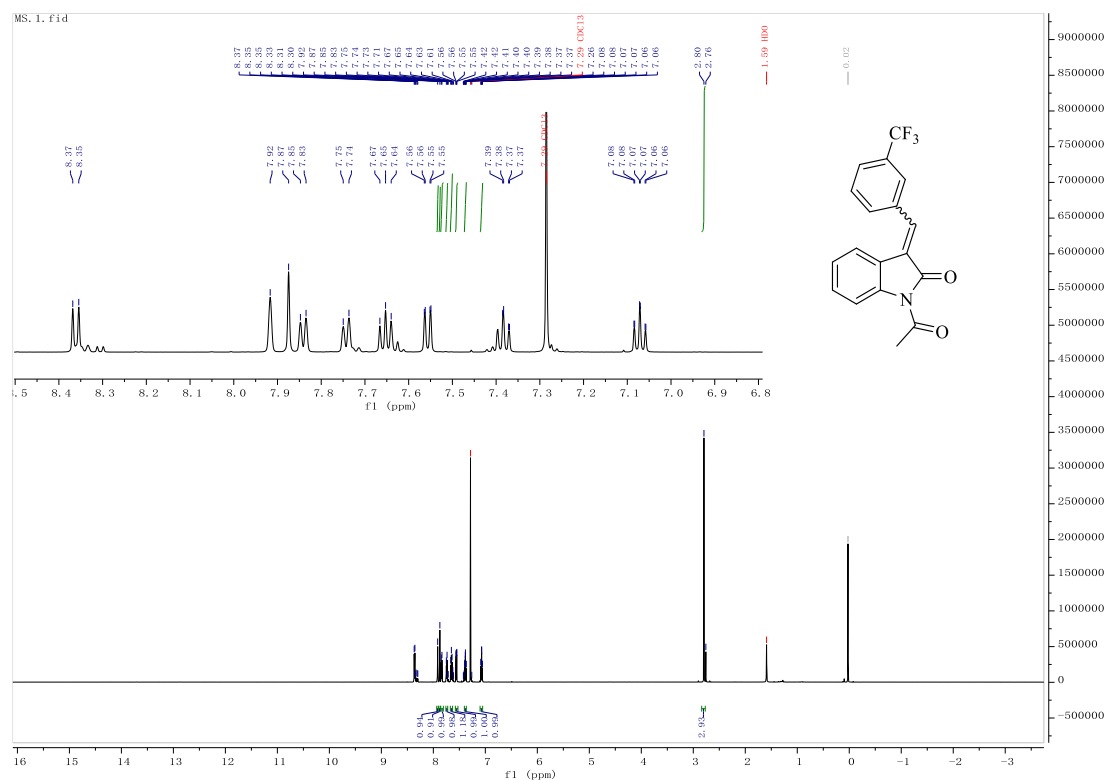

**Figure S10-1.**  $^1\text{H}$  NMR spectrum (600 Hz,  $\text{CDCl}_3$ ) of compound **4j**

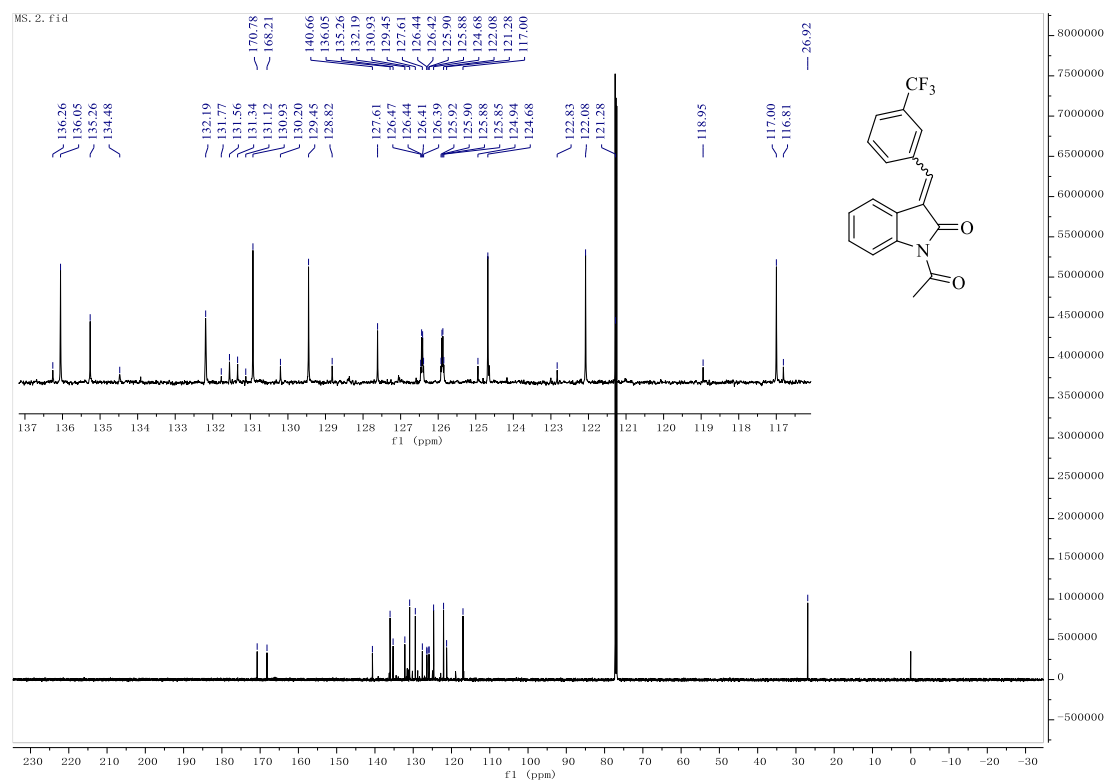

**Figure S10-2.**  $^{13}\text{C}$  NMR spectrum (150 Hz,  $\text{CDCl}_3$ ) of compound **4j**

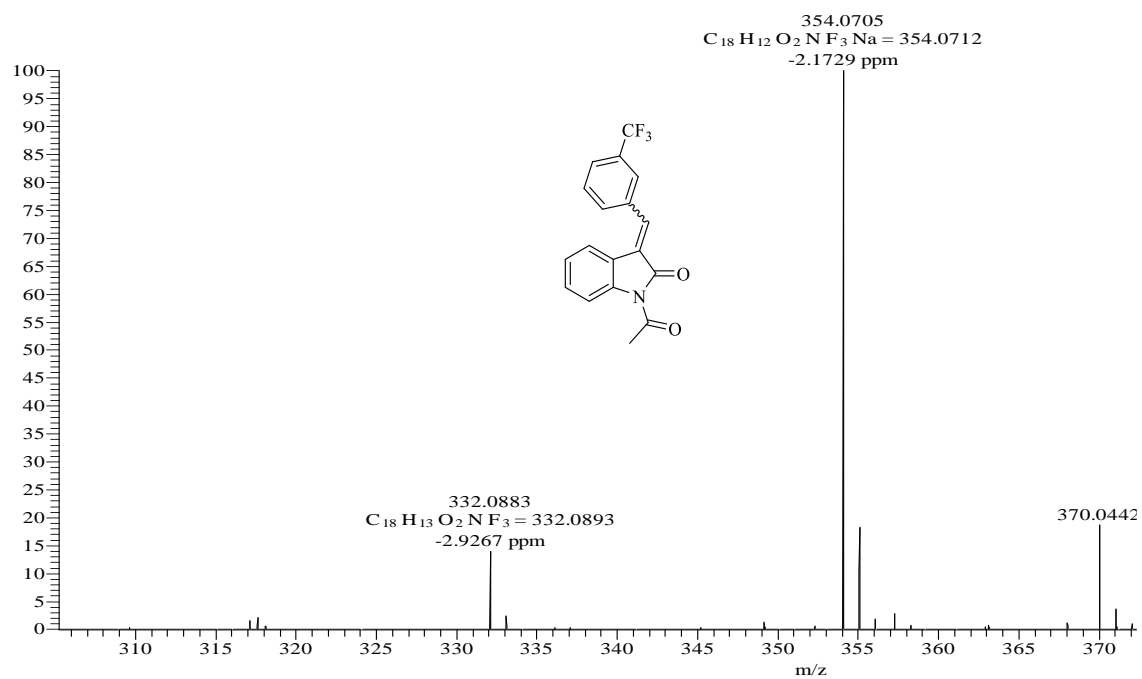

**Figure S10-3.** HRMS of compound **4j**

**1-Acetyl-6-chloro-3-(2-(trifluoromethyl)benzylidene)indolin-2-one(4k)**

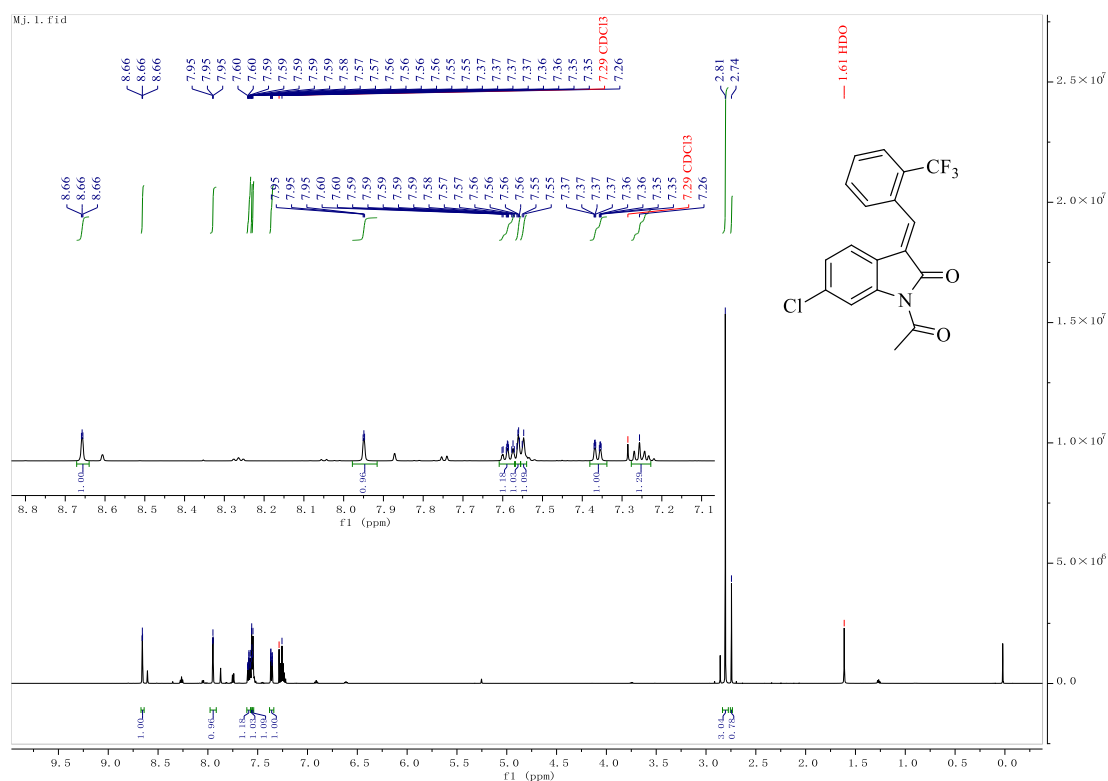

**Figure S11-1.** <sup>1</sup>H NMR spectrum (600 Hz, CDCl<sub>3</sub>) of compound 4k

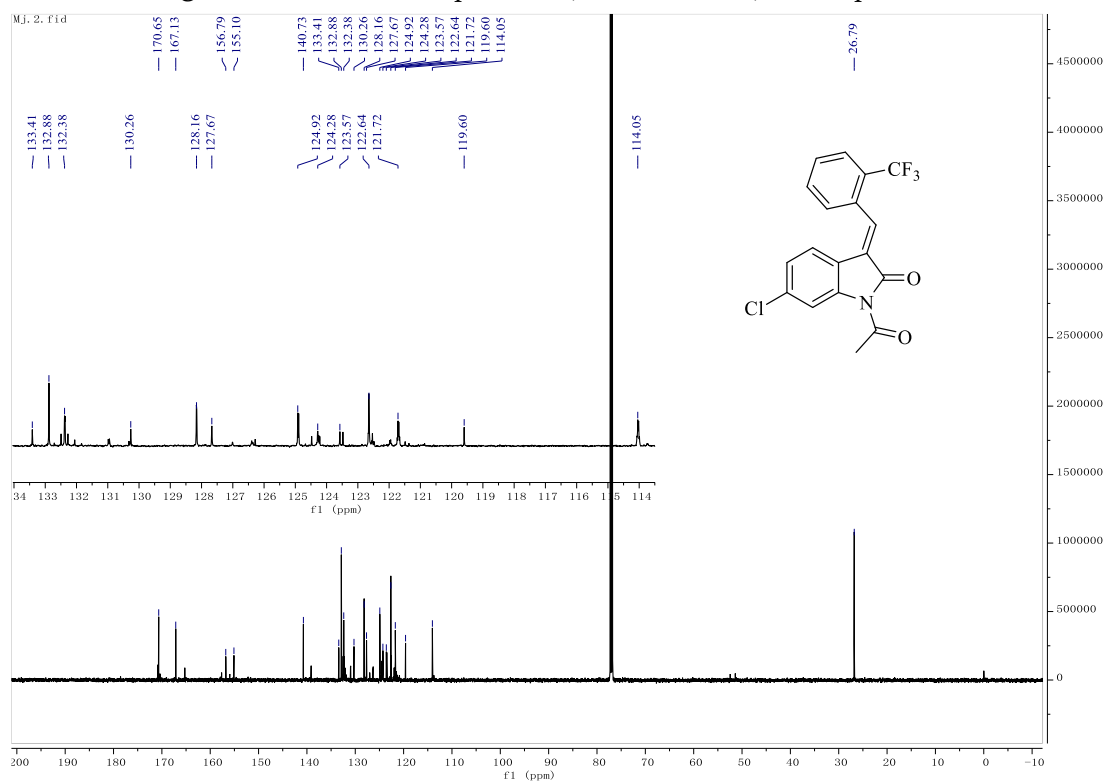

**Figure S11-2.** <sup>13</sup>C NMR spectrum (150 Hz, CDCl<sub>3</sub>) of compound 4k

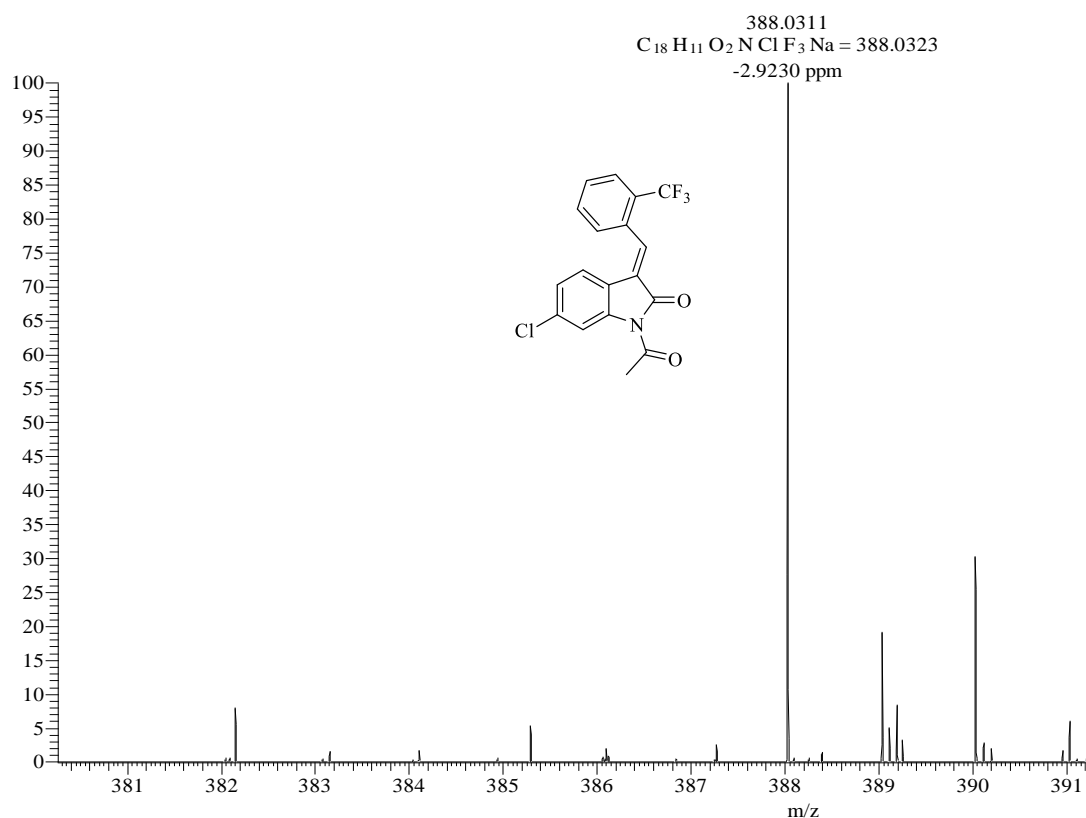

Figure S11-3. HRMS of compound 4k

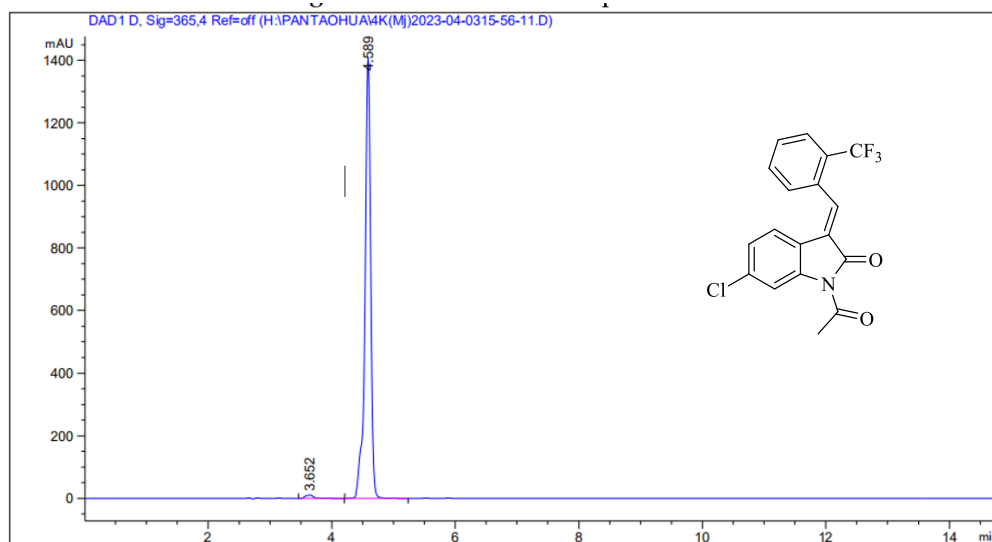

| Peak # | RetTime [min] | Type | Width [min] | Area [mAU*s] | Height [mAU] | Area %  |
|--------|---------------|------|-------------|--------------|--------------|---------|
| 1      | 3.652         | BV R | 0.1241      | 92.01453     | 9.92733      | 1.0192  |
| 2      | 4.589         | BB   | 0.0961      | 8936.00000   | 1406.58325   | 98.9808 |

Totals : 9028.01453 1416.51058

Figure S11-4. HPLC of compound 4k

**1-Acetyl-6-chloro-3-(4-chloro-3-(trifluoromethyl)benzylidene)indolin-2-one(4l)**

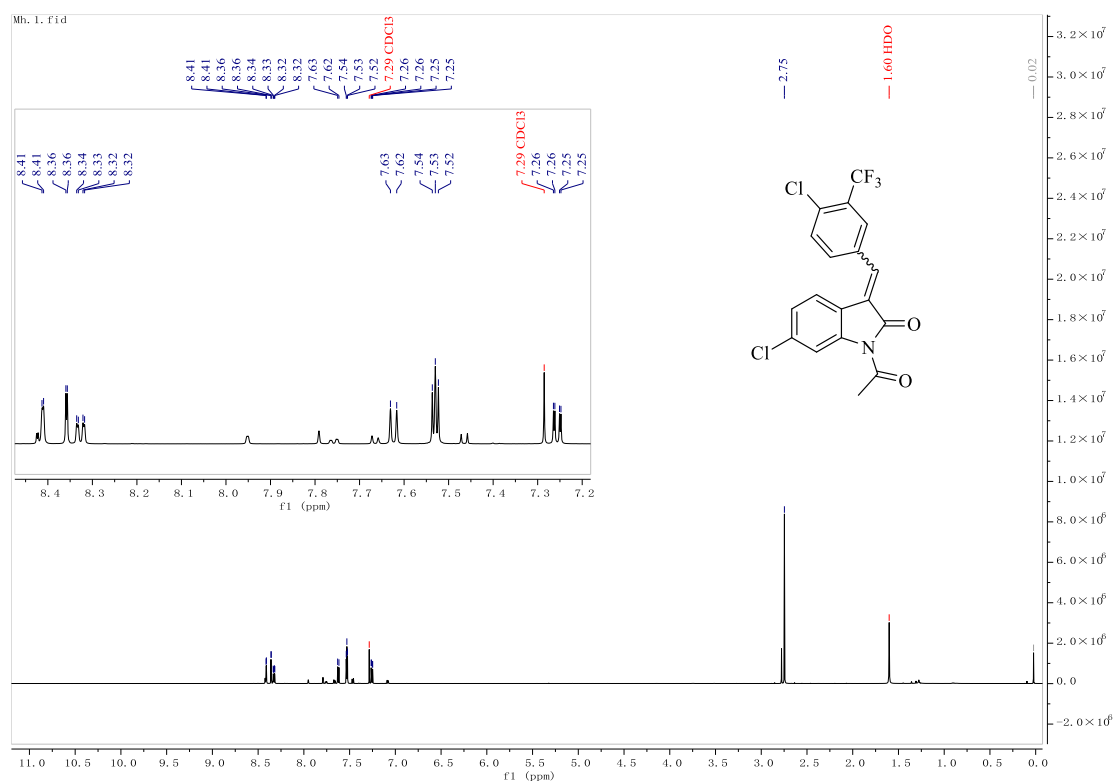

**Figure S12-1.  $^1\text{H}$ , NMR spectrum (600 Hz,  $\text{CDCl}_3$ ) of compound 4l**

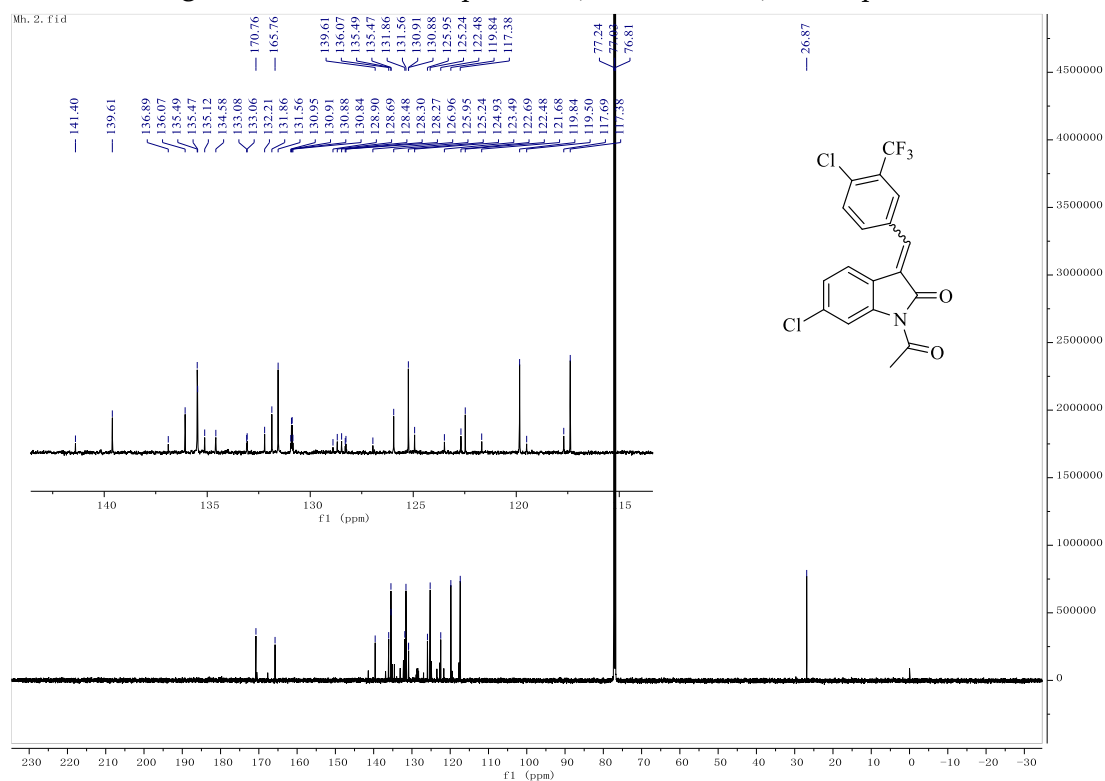

**Figure S12-2.  $^{13}\text{C}$  NMR spectrum (150 Hz,  $\text{CDCl}_3$ ) of compound 4l**

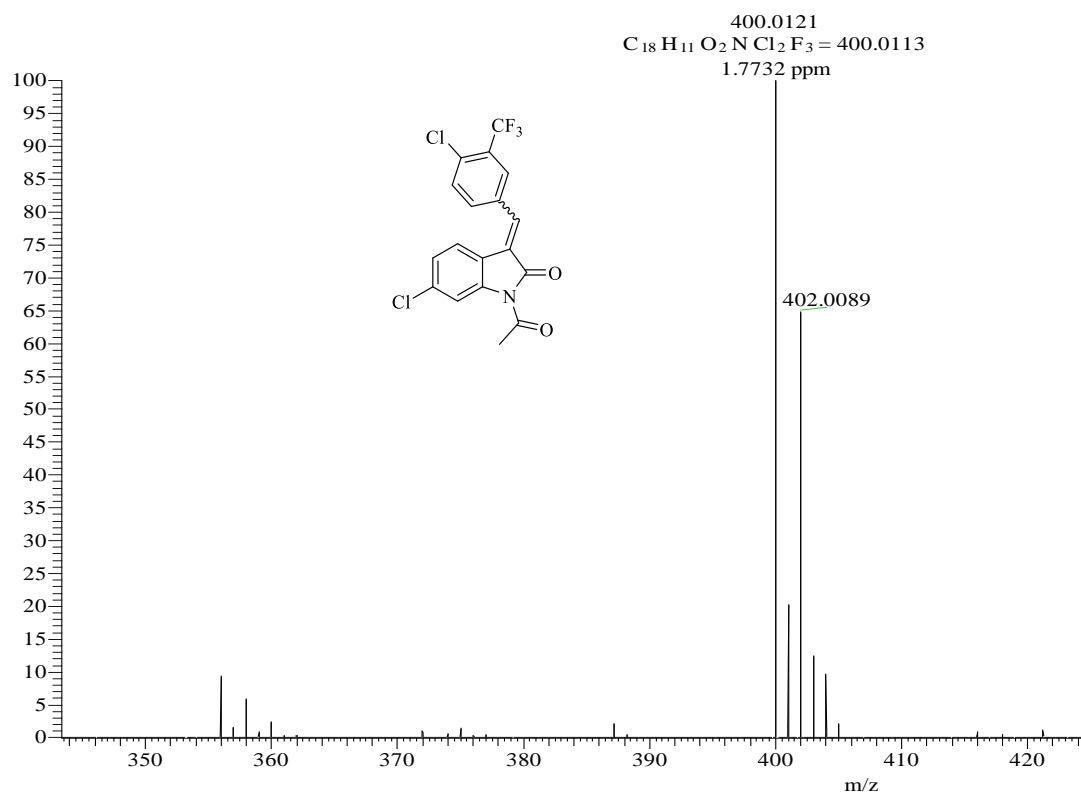

Figure S12-3. HRMS of compound 4l

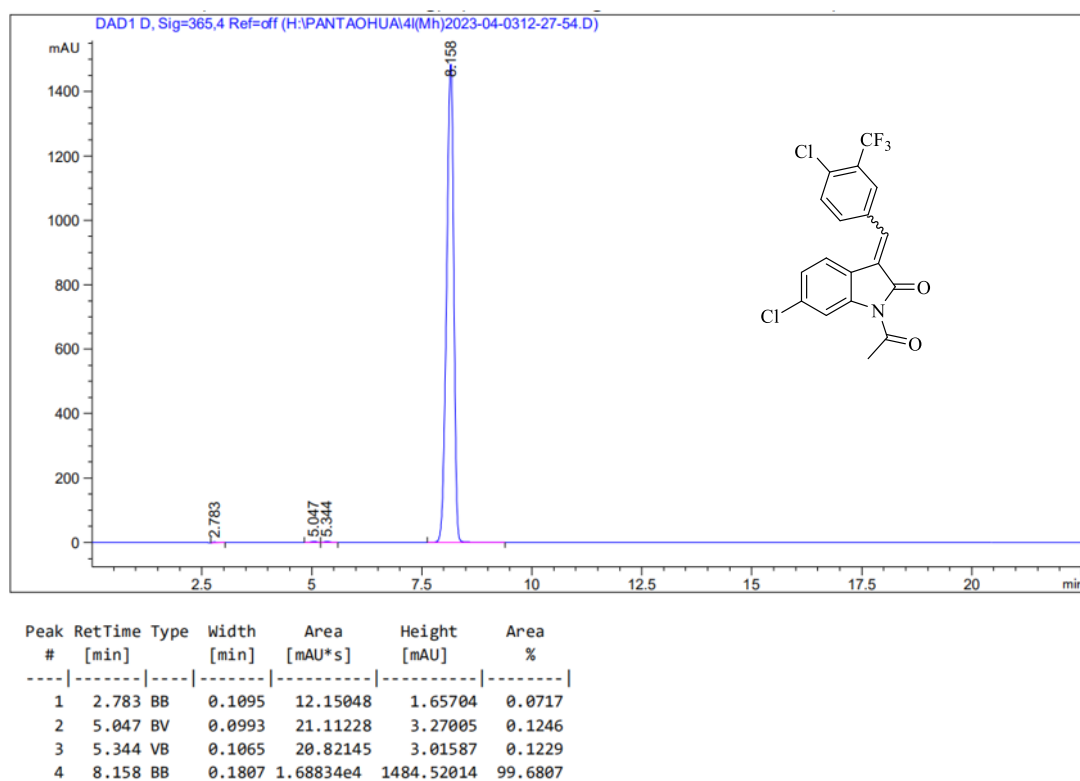

Figure S12-4. HPLC of compound 4l

**1-Acetyl-6-chloro-3-(4-chloro-3-fluorobenzylidene)indolin-2-one(4m)**

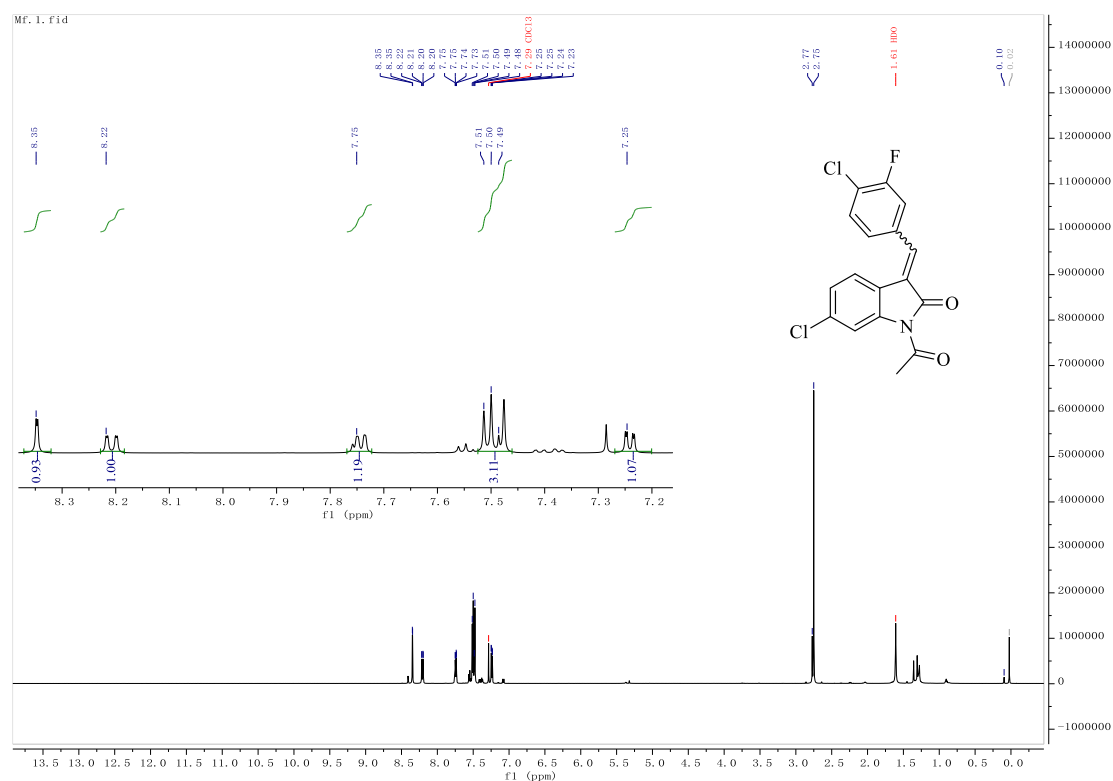

**Figure S13-1.** <sup>1</sup>H NMR spectrum (600 MHz CDCl<sub>3</sub>) of compound **4m**

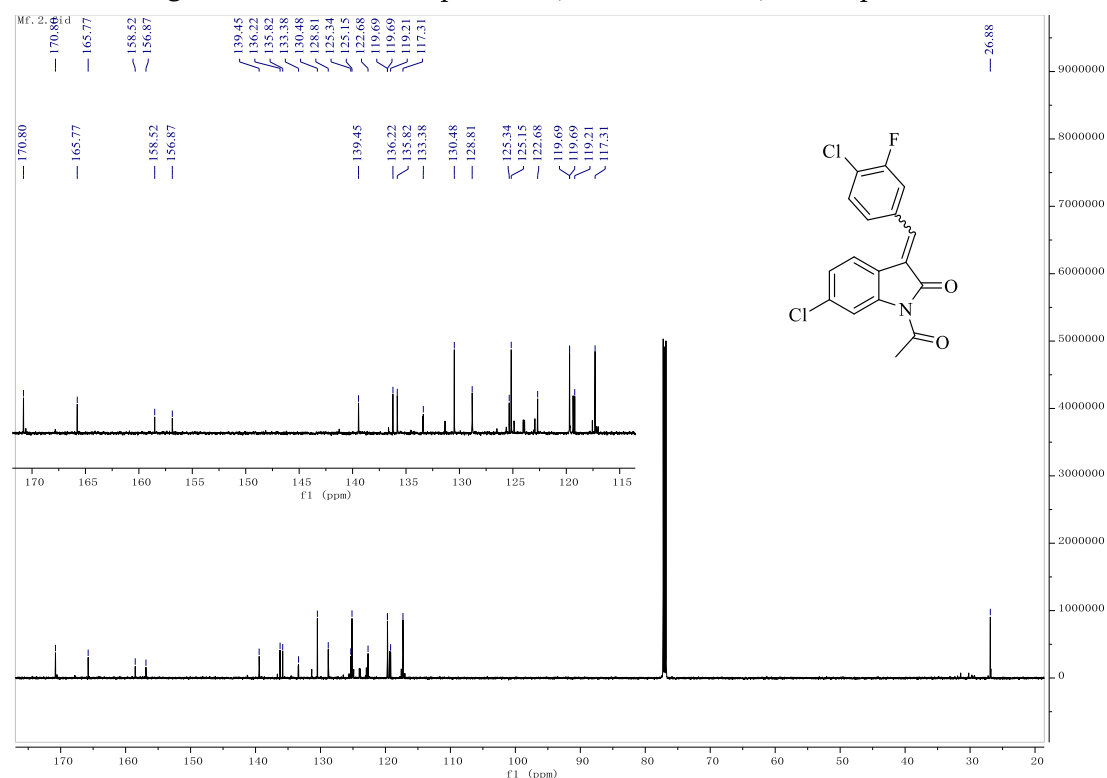

**Figure S13-2.** <sup>13</sup>C NMR spectrum (150 MHz CDCl<sub>3</sub>) of compound **4m**

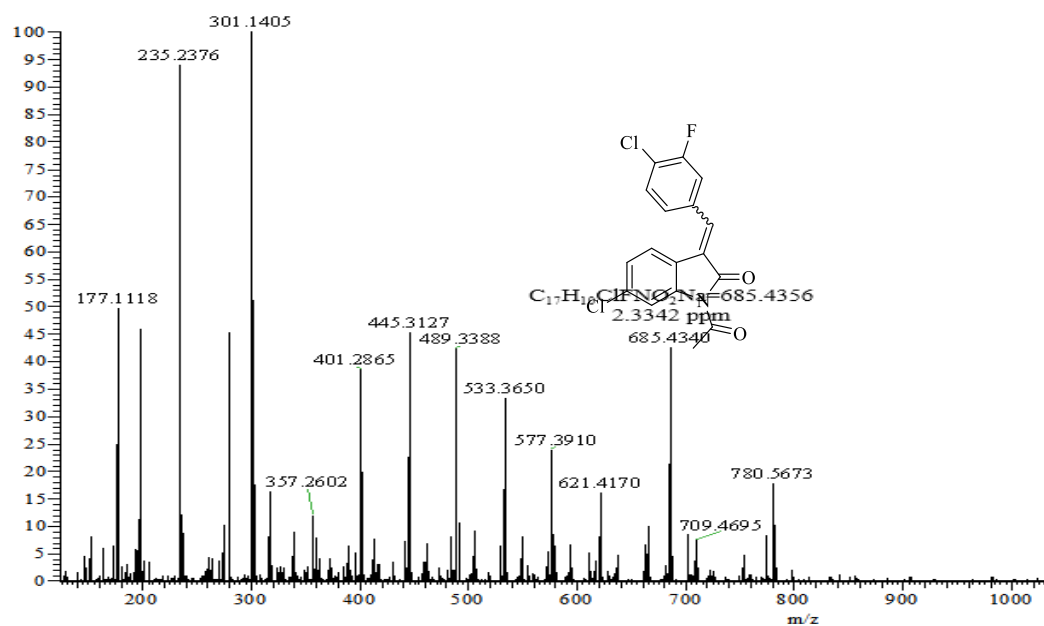

Figure S13-3. HRMS of compound 4m



**1-Acetyl-6-chloro-3-(2,3-difluorobenzylidene)indolin-2-one(4n)**

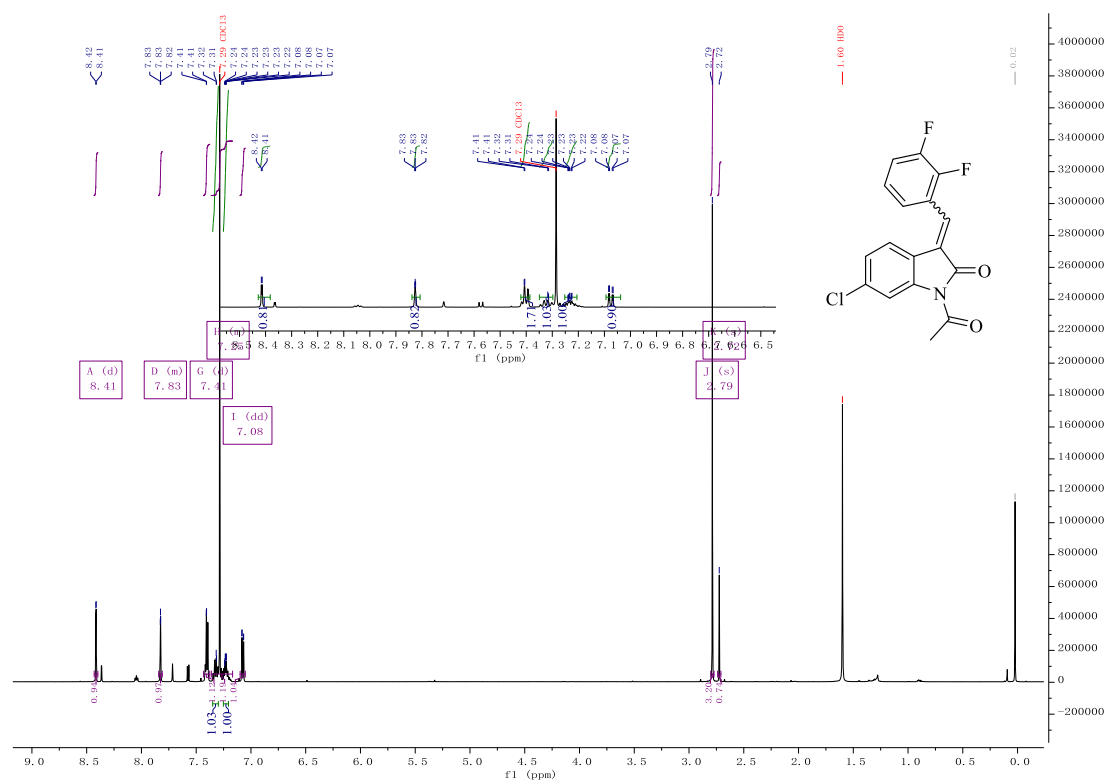

**Figure S14-1.** <sup>1</sup>H NMR spectrum (600 MHz, CDCl<sub>3</sub>) of compound 4n

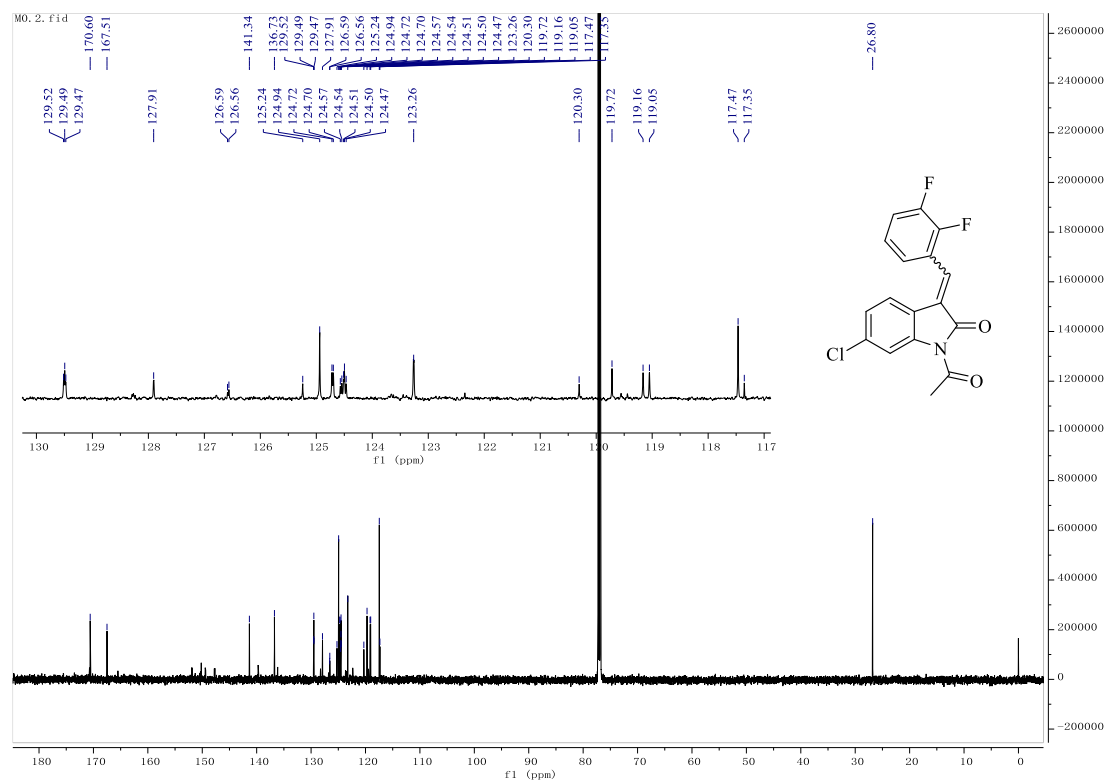

**Figure S14-2.** <sup>13</sup>C NMR spectrum (150 MHz, CDCl<sub>3</sub>) of compound 4n

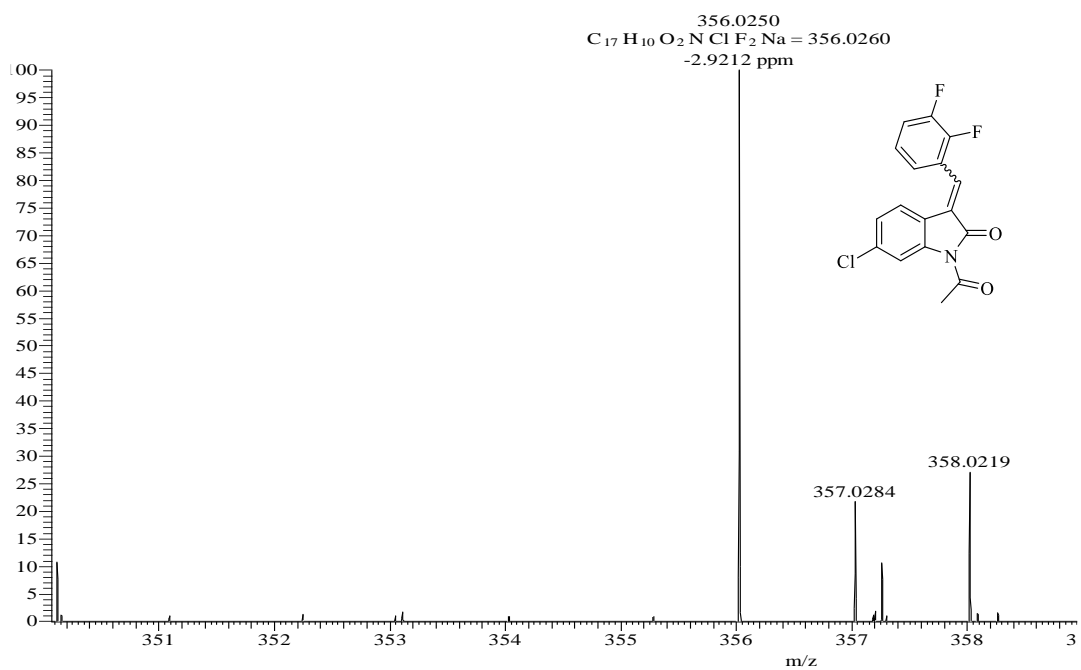

**Figure S14-3.** HRMS of compound **4n**

**<sup>1</sup>H NMR Spectrum (CDCl<sub>3</sub>)**

**Chemical Structure:** 1-(2-chlorophenyl)-2-(2-chlorophenyl)-1H-imidazole-3-carboxamide

**Peak Data:**

| Chemical Shift (ppm) | Integration |
|----------------------|-------------|
| 8.40                 | 0.90        |
| 7.82                 | 0.96        |
| 7.53                 | 2.07        |
| 7.38                 | 1.02        |
| 7.36                 | 1.02        |
| 7.34                 | 1.37        |
| 7.29                 | 1.00        |
| 7.28                 | 1.00        |
| 7.27                 | 1.00        |
| 7.26                 | 1.00        |
| 7.25                 | 1.00        |
| 7.24                 | 1.00        |
| 7.23                 | 1.00        |
| 7.22                 | 1.00        |
| 7.21                 | 1.00        |
| 7.20                 | 1.00        |
| 7.19                 | 1.00        |
| 7.18                 | 1.00        |
| 7.17                 | 1.00        |
| 7.16                 | 1.00        |
| 7.15                 | 1.00        |
| 7.14                 | 1.00        |
| 7.13                 | 1.00        |
| 7.12                 | 1.00        |
| 7.11                 | 1.00        |
| 7.10                 | 1.00        |
| 7.09                 | 1.00        |
| 7.08                 | 1.00        |
| 7.07                 | 1.00        |
| 7.06                 | 1.00        |
| 7.05                 | 1.00        |
| 7.04                 | 1.00        |
| 7.03                 | 1.00        |
| 7.02                 | 1.00        |
| 7.01                 | 1.00        |
| 7.00                 | 1.00        |
| 6.99                 | 1.00        |
| 6.98                 | 1.00        |
| 6.97                 | 1.00        |
| 6.96                 | 1.00        |
| 6.95                 | 1.00        |
| 6.94                 | 1.00        |
| 6.93                 | 1.00        |
| 6.92                 | 1.00        |
| 6.91                 | 1.00        |
| 6.90                 | 1.00        |
| 6.89                 | 1.00        |
| 6.88                 | 1.00        |
| 6.87                 | 1.00        |
| 6.86                 | 1.00        |
| 6.85                 | 1.00        |
| 6.84                 | 1.00        |
| 6.83                 | 1.00        |
| 6.82                 | 1.00        |
| 6.81                 | 1.00        |
| 6.80                 | 1.00        |
| 6.79                 | 1.00        |
| 6.78                 | 1.00        |
| 6.77                 | 1.00        |
| 6.76                 | 1.00        |
| 6.75                 | 1.00        |
| 6.74                 | 1.00        |
| 6.73                 | 1.00        |
| 6.72                 | 1.00        |
| 6.71                 | 1.00        |
| 6.70                 | 1.00        |
| 6.69                 | 1.00        |
| 6.68                 | 1.00        |
| 6.67                 | 1.00        |
| 6.66                 | 1.00        |
| 6.65                 | 1.00        |
| 6.64                 | 1.00        |
| 6.63                 | 1.00        |
| 6.62                 | 1.00        |
| 6.61                 | 1.00        |
| 6.60                 | 1.00        |
| 6.59                 | 1.00        |
| 6.58                 | 1.00        |
| 6.57                 | 1.00        |
| 6.56                 | 1.00        |
| 6.55                 | 1.00        |
| 6.54                 | 1.00        |
| 6.53                 | 1.00        |
| 6.52                 | 1.00        |
| 6.51                 | 1.00        |
| 6.50                 | 1.00        |
| 6.49                 | 1.00        |
| 6.48                 | 1.00        |
| 6.47                 | 1.00        |
| 6.46                 | 1.00        |
| 6.45                 | 1.00        |
| 6.44                 | 1.00        |
| 6.43                 | 1.00        |
| 6.42                 | 1.00        |
| 6.41                 | 1.00        |
| 6.40                 | 1.00        |
| 6.39                 | 1.00        |
| 6.38                 | 1.00        |
| 6.37                 | 1.00        |
| 6.36                 | 1.00        |
| 6.35                 | 1.00        |
| 6.34                 | 1.00        |
| 6.33                 | 1.00        |
| 6.32                 | 1.00        |
| 6.31                 | 1.00        |
| 6.30                 | 1.00        |
| 6.29                 | 1.00        |
| 6.28                 | 1.00        |
| 6.27                 | 1.00        |
| 6.26                 | 1.00        |
| 6.25                 | 1.00        |
| 6.24                 | 1.00        |
| 6.23                 | 1.00        |
| 6.22                 | 1.00        |
| 6.21                 | 1.00        |
| 6.20                 | 1.00        |
| 6.19                 | 1.00        |
| 6.18                 | 1.00        |
| 6.17                 | 1.00        |
| 6.16                 | 1.00        |
| 6.15                 | 1.00        |
| 6.14                 | 1.00        |
| 6.13                 | 1.00        |
| 6.12                 | 1.00        |
| 6.11                 | 1.00        |
| 6.10                 | 1.00        |
| 6.09                 | 1.00        |
| 6.08                 | 1.00        |
| 6.07                 | 1.00        |
| 6.06                 | 1.00        |
| 6.05                 | 1.00        |
| 6.04                 | 1.00        |
| 6.03                 | 1.00        |
| 6.02                 | 1.00        |
| 6.01                 | 1.00        |
| 6.00                 | 1.00        |
| 5.99                 | 1.00        |
| 5.98                 | 1.00        |
| 5.97                 | 1.00        |
| 5.96                 | 1.00        |
| 5.95                 | 1.00        |
| 5.94                 | 1.00        |
| 5.93                 | 1.00        |
| 5.92                 | 1.00        |
| 5.91                 | 1.00        |
| 5.90                 | 1.00        |
| 5.89                 | 1.00        |
| 5.88                 | 1.00        |
| 5.87                 | 1.00        |
| 5.86                 | 1.00        |
| 5.85                 | 1.00        |
| 5.84                 | 1.00        |
| 5.83                 | 1.00        |
| 5.82                 | 1.00        |
| 5.81                 | 1.00        |
| 5.80                 | 1.00        |
| 5.79                 | 1.00        |
| 5.78                 | 1.00        |
| 5.77                 | 1.00        |
| 5.76                 | 1.00        |
| 5.75                 | 1.00        |
| 5.74                 | 1.00        |
| 5.73                 | 1.00        |
| 5.72                 | 1.00        |
| 5.71                 | 1.00        |
| 5.70                 | 1.00        |
| 5.69                 | 1.00        |
| 5.68                 | 1.00        |
| 5.67                 | 1.00        |
| 5.66                 | 1.00        |
| 5.65                 | 1.00        |
| 5.64                 | 1.00        |
| 5.63                 | 1.00        |
| 5.62                 | 1.00        |
| 5.61                 | 1.00        |
| 5.60                 | 1.00        |
| 5.59                 | 1.00</      |

**<sup>1</sup>H NMR (400 MHz, CDCl<sub>3</sub>)**

| Chemical Shift (ppm) | Integration |
|----------------------|-------------|
| 8.18                 | 0.10        |
| 8.15                 | 0.10        |
| 8.12                 | 0.10        |
| 8.08                 | 0.10        |
| 8.05                 | 0.10        |
| 8.02                 | 0.10        |
| 7.98                 | 0.10        |
| 7.95                 | 0.10        |
| 7.92                 | 0.10        |
| 7.88                 | 0.10        |
| 7.85                 | 0.10        |
| 7.82                 | 0.10        |
| 7.78                 | 0.10        |
| 7.75                 | 0.10        |
| 7.72                 | 0.10        |
| 7.68                 | 0.10        |
| 7.65                 | 0.10        |
| 7.62                 | 0.10        |
| 7.58                 | 0.10        |
| 7.55                 | 0.10        |
| 7.52                 | 0.10        |
| 7.48                 | 0.10        |
| 7.45                 | 0.10        |
| 7.42                 | 0.10        |
| 7.38                 | 0.10        |
| 7.35                 | 0.10        |
| 7.32                 | 0.10        |
| 7.28                 | 0.10        |
| 7.25                 | 0.10        |
| 7.22                 | 0.10        |
| 7.18                 | 0.10        |
| 7.15                 | 0.10        |
| 7.12                 | 0.10        |
| 7.08                 | 0.10        |
| 7.05                 | 0.10        |
| 7.02                 | 0.10        |
| 6.98                 | 0.10        |
| 6.95                 | 0.10        |
| 6.92                 | 0.10        |
| 6.88                 | 0.10        |
| 6.85                 | 0.10        |
| 6.82                 | 0.10        |
| 6.78                 | 0.10        |
| 6.75                 | 0.10        |
| 6.72                 | 0.10        |
| 6.68                 | 0.10        |
| 6.65                 | 0.10        |
| 6.62                 | 0.10        |
| 6.58                 | 0.10        |
| 6.55                 | 0.10        |
| 6.52                 | 0.10        |
| 6.48                 | 0.10        |
| 6.45                 | 0.10        |
| 6.42                 | 0.10        |
| 6.38                 | 0.10        |
| 6.35                 | 0.10        |
| 6.32                 | 0.10        |
| 6.28                 | 0.10        |
| 6.25                 | 0.10        |
| 6.22                 | 0.10        |
| 6.18                 | 0.10        |
| 6.15                 | 0.10        |
| 6.12                 | 0.10        |
| 6.08                 | 0.10        |
| 6.05                 | 0.10        |
| 6.02                 | 0.10        |
| 5.98                 | 0.10        |
| 5.95                 | 0.10        |
| 5.92                 | 0.10        |
| 5.88                 | 0.10        |
| 5.85                 | 0.10        |
| 5.82                 | 0.10        |
| 5.78                 | 0.10        |
| 5.75                 | 0.10        |
| 5.72                 | 0.10        |
| 5.68                 | 0.10        |
| 5.65                 | 0.10        |
| 5.62                 | 0.10        |
| 5.58                 | 0.10        |
| 5.55                 | 0.10        |
| 5.52                 | 0.10        |
| 5.48                 | 0.10        |
| 5.45                 | 0.10        |
| 5.42                 | 0.10        |
| 5.38                 | 0.10        |
| 5.35                 | 0.10        |
| 5.32                 | 0.10        |
| 5.28                 | 0.10        |
| 5.25                 | 0.10        |
| 5.22                 | 0.10        |
| 5.18                 | 0.10        |
| 5.15                 | 0.10        |
| 5.12                 | 0.10        |
| 5.08                 | 0.10        |
| 5.05                 | 0.10        |
| 5.02                 | 0.10        |
| 4.98                 | 0.10        |
| 4.95                 | 0.10        |
| 4.92                 | 0.10        |
| 4.88                 | 0.10        |
| 4.85                 | 0.10        |
| 4.82                 | 0.10        |
| 4.78                 | 0.10        |
| 4.75                 | 0.10        |
| 4.72                 | 0.10        |
| 4.68                 | 0.10        |
| 4.65                 | 0.10        |
| 4.62                 | 0.10        |
| 4.58                 | 0.10        |
| 4.55                 | 0.10        |
| 4.52                 | 0.10        |
| 4.48                 | 0.10        |
| 4.45                 | 0.10        |
| 4.42                 | 0.10        |
| 4.38                 | 0.10        |
| 4.35                 | 0.10        |
| 4.32                 | 0.10        |
| 4.28                 | 0.10        |
| 4.25                 | 0.10        |
| 4.22                 | 0.10        |
| 4.18                 | 0.10        |
| 4.15                 | 0.10        |
| 4.12                 | 0.10        |
| 4.08                 | 0.10        |
| 4.05                 | 0.10        |
| 4.02                 | 0.10        |
| 3.98                 | 0.10        |
| 3.95                 | 0.10        |
| 3.92                 | 0.10        |
| 3.88                 | 0.10        |
| 3.85                 | 0.10        |
| 3.82                 | 0.10        |
| 3.78                 | 0.10        |
| 3.75                 | 0.10        |
| 3.72                 | 0.10        |
| 3.68                 | 0.10        |
| 3.65                 | 0.10        |
| 3.62                 | 0.10        |
| 3.58                 | 0.10        |
| 3.55                 | 0.10        |
| 3.52                 | 0.10        |
| 3.48                 | 0.10        |
| 3.45                 | 0.10        |
| 3.42                 | 0.10        |
| 3.38                 | 0.10        |
| 3.35                 | 0.10        |
| 3.32                 | 0.10        |
| 3.28                 | 0.10        |
| 3.25                 | 0.10        |
| 3.22                 | 0.10        |
| 3.18                 | 0.10        |
| 3.15                 | 0.10        |
| 3.12                 | 0.10        |
| 3.08                 | 0.10        |
| 3.05                 | 0.10        |
| 3.02                 | 0.10        |
| 2.98                 | 0.10        |
| 2.95                 | 0.10        |
| 2.92                 | 0.10        |
| 2.88                 | 0.10        |
| 2.85                 | 0.10        |
| 2.82                 | 0.10        |
| 2.78                 | 0.10        |
| 2.75                 | 0.10        |
| 2.72                 | 0.10        |
| 2.68                 | 0.10        |
| 2.65                 | 0.10        |
| 2.62                 | 0.10        |
| 2.58                 | 0.10        |
| 2.55                 | 0.10        |
| 2.52                 | 0.10        |
| 2.48                 | 0.10        |
| 2.45                 | 0.10        |
| 2.42                 | 0.10        |
| 2.38                 | 0.10        |
| 2.35                 | 0.10        |
| 2.32                 | 0.10        |
| 2.28                 | 0.10        |
| 2.25                 | 0.10        |

31

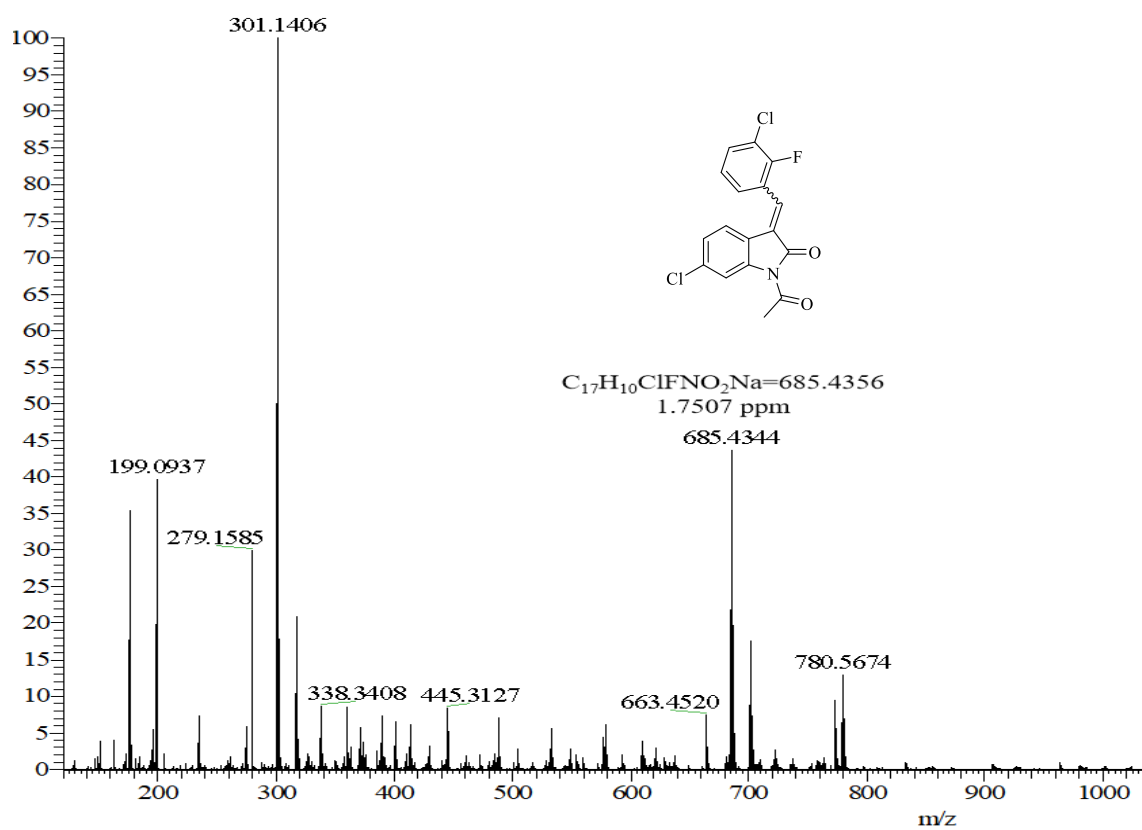

Figure S15-3. HRMS of compound 4o

**1-Acetyl-3-(3-chloro-2-fluorobenzylidene)-6-(trifluoromethyl)indolin-2-one (4p)**

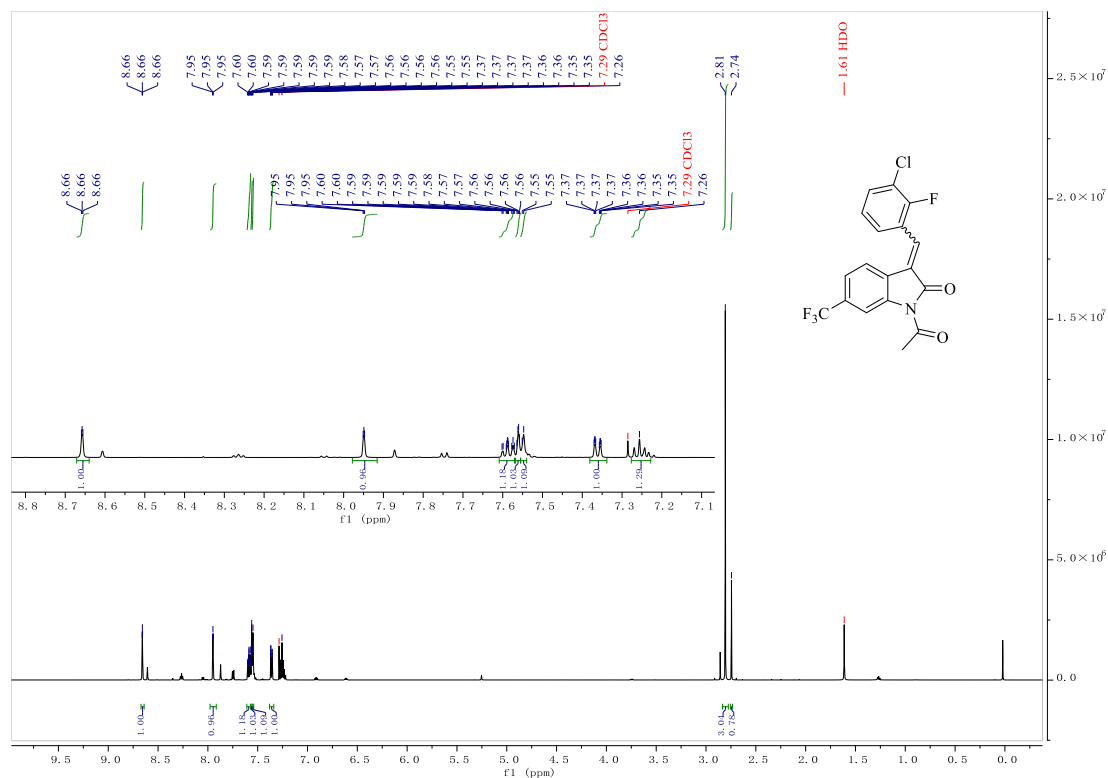

**Figure S16-1.** <sup>1</sup>H NMR spectrum (600 MHz, CDCl<sub>3</sub>) of compound 4p

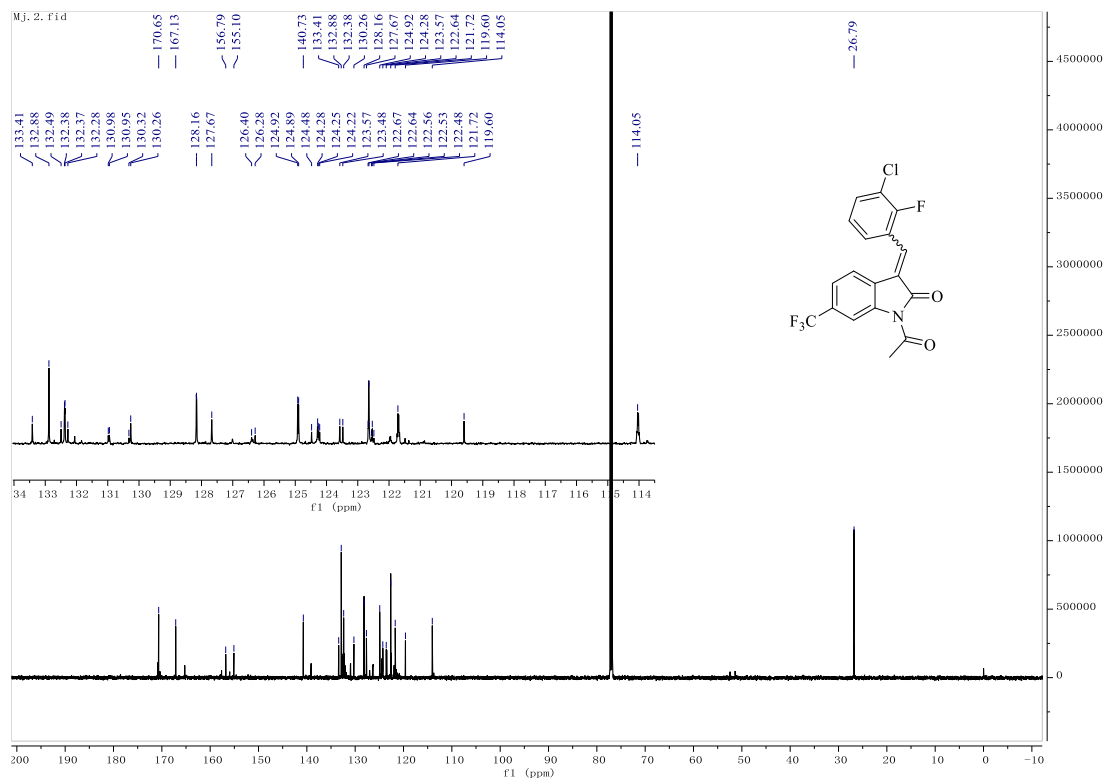

**Figure S16-2.** <sup>13</sup>C NMR spectrum (150 MHz, CDCl<sub>3</sub>) of compound 4p

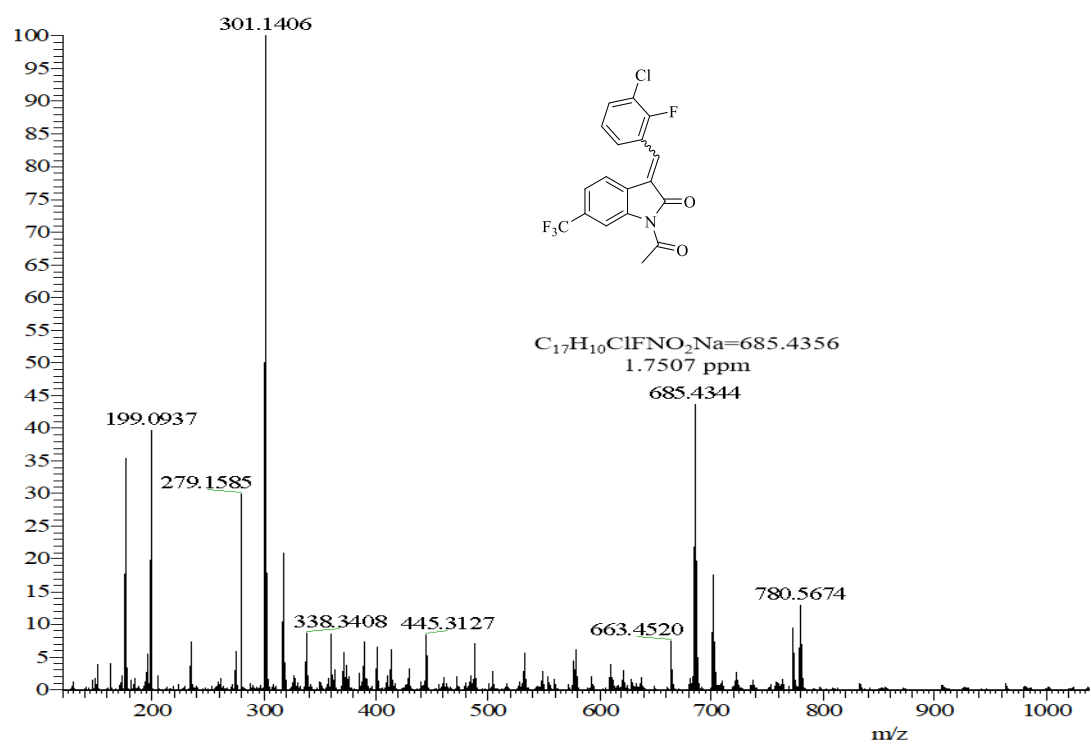

Figure S16-3. HRMS of compound 4p

35

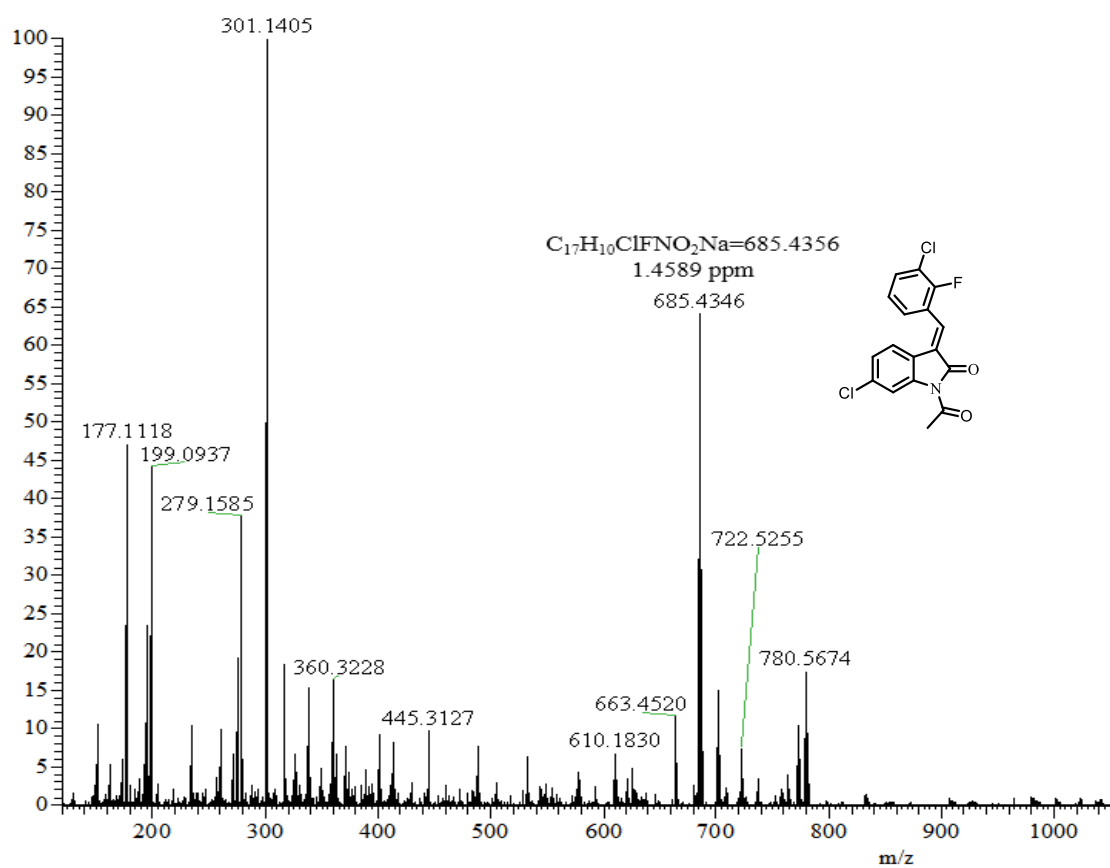

Figure S17-3. HRMS of compound 4q



**Chemical structure of compound 10:**

COc1ccc(cc1C(=O)N2C(=O)c3ccc(Cl)cc32)C4=CC=C(C=C4)C(F)(F)F

**<sup>1</sup>H NMR spectrum (CDCl<sub>3</sub>):**

- Chemical shift range:** 0.0 to 11.0 ppm.
- Integration values:** 3.24, 3.11, 1.00, 1.06, 1.91, 1.19, 1.91, 1.10.
- Peak assignments:**
  - ~0.9 ppm (t, 3H, 3.24)
  - ~1.6 ppm (d, 3H, 3.11)
  - 7.0-7.5 ppm (m, 1.10, 1.19, 1.91, 1.91, 1.06)
  - ~7.3 ppm (s, 1H, 1.91)
  - 8.3-8.4 ppm (m, 1.00)
- Solvent peaks:** CDCl<sub>3</sub> (7.26, 7.29), H<sub>2</sub>O (1.64, 1.63).

37

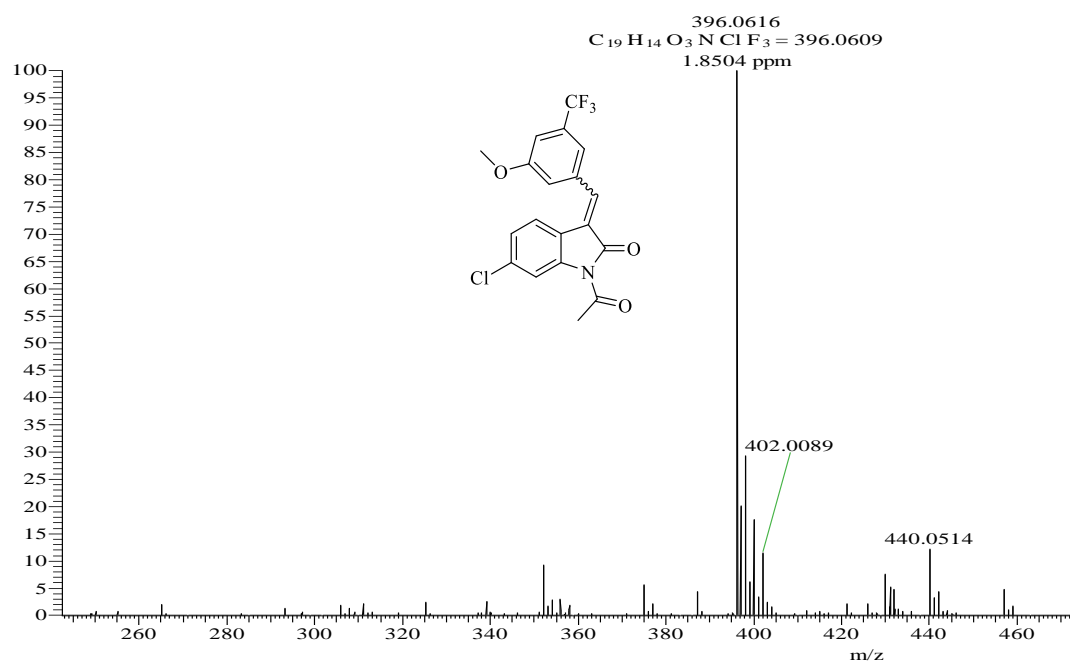

**Figure S18-3.** HRMS of compound **4r**

**1-Acetyl-6-chloro-3-(3-methoxybenzylidene)indolin-2-one(4s)**

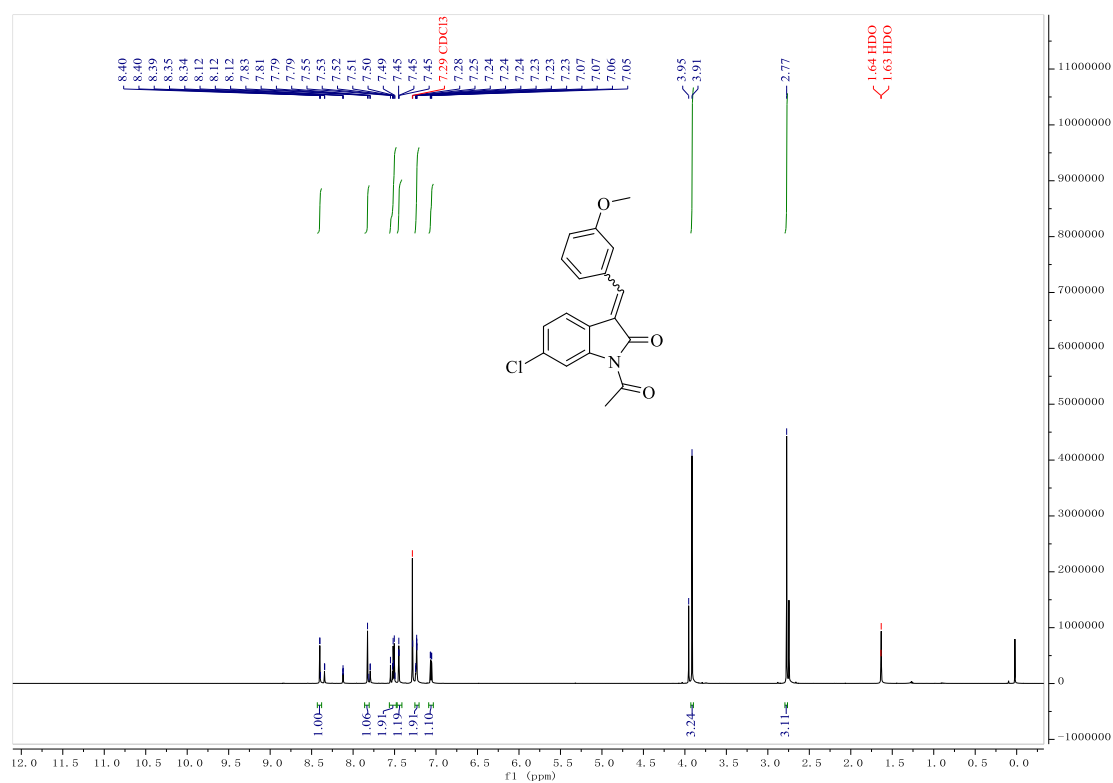

**Figure S19-1.** <sup>1</sup>H NMR spectrum (600 MHz, 150 MHz, CDCl<sub>3</sub>) of compound 4s

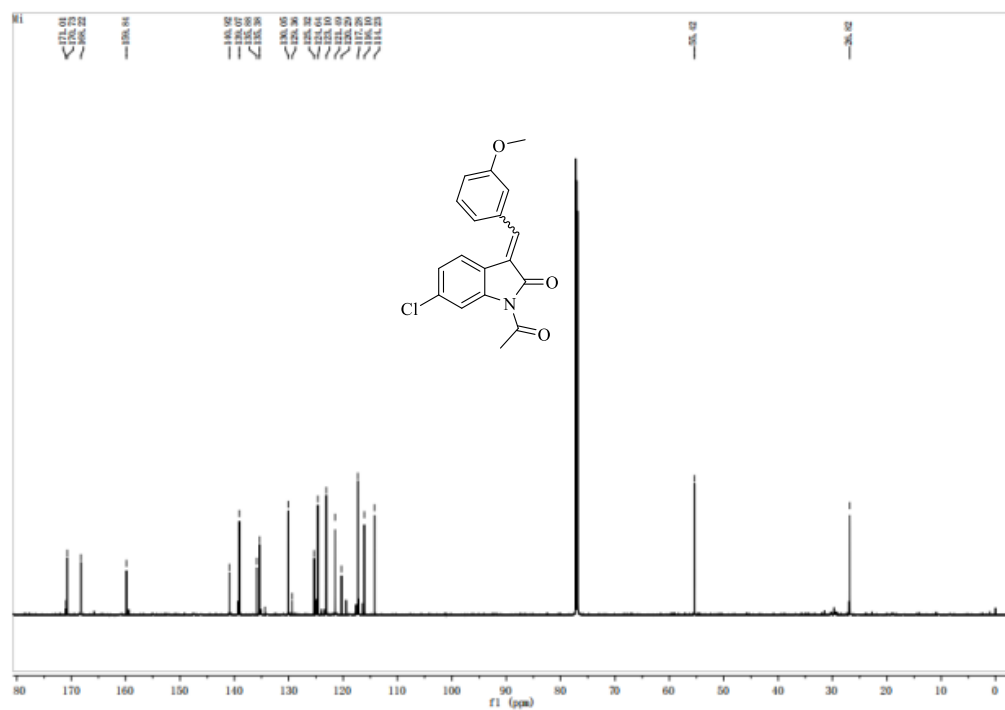

**Figure S19-2.** <sup>13</sup>C NMR spectrum (150 MHz, CDCl<sub>3</sub>) of compound 4s

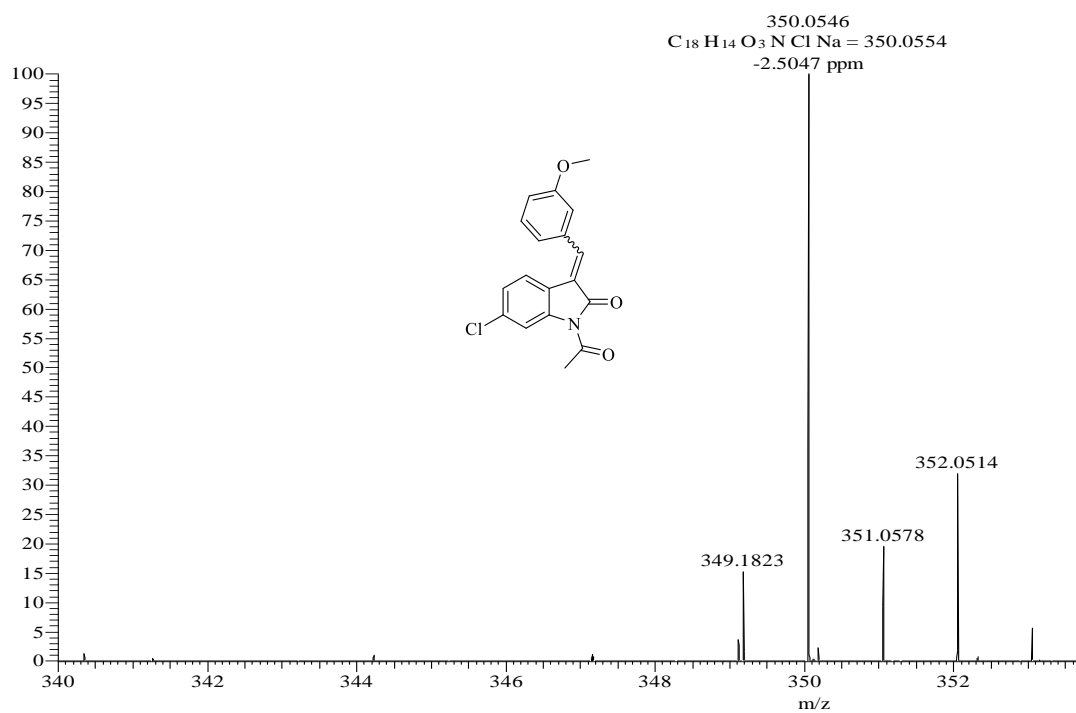

Figure S19-3. HRMS of compound 4s

**Tert-butyl-6-chloro-2-oxo-3-(3-(trifluoromethyl)benzylidene)indoline-1-carboxylate(4t)**

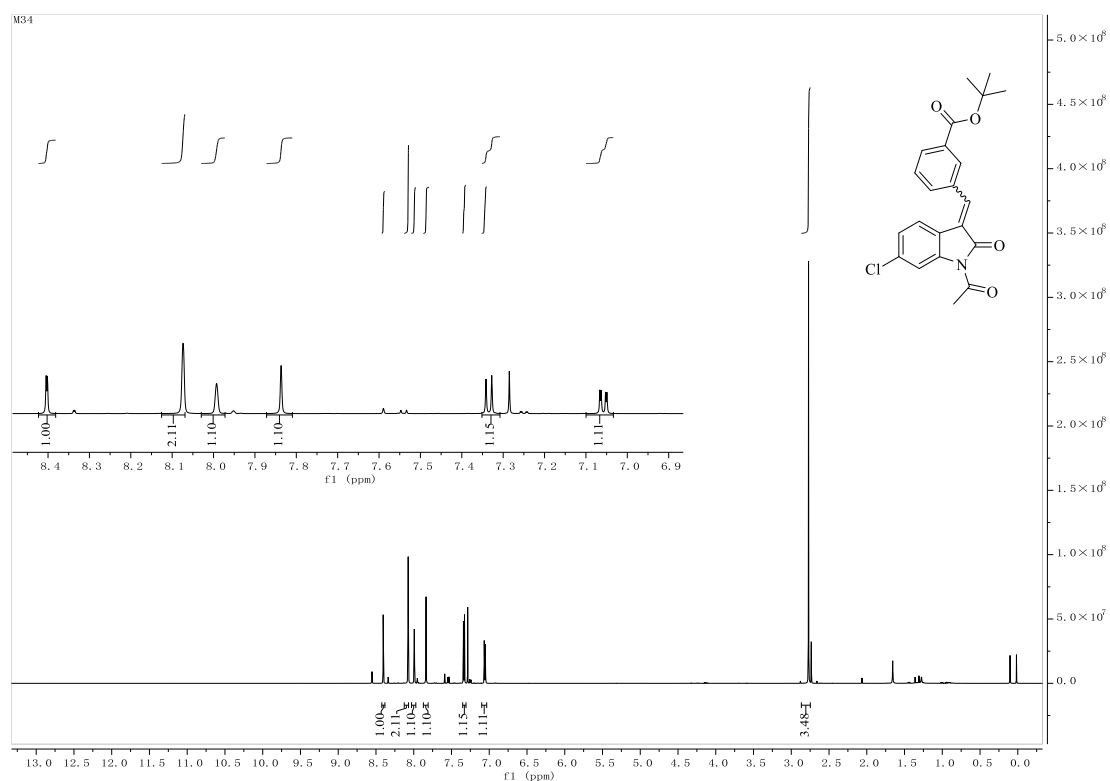

**Figure S20-1.** <sup>1</sup>H NMR spectrum (600 MHz, CDCl<sub>3</sub>) of compound 4t

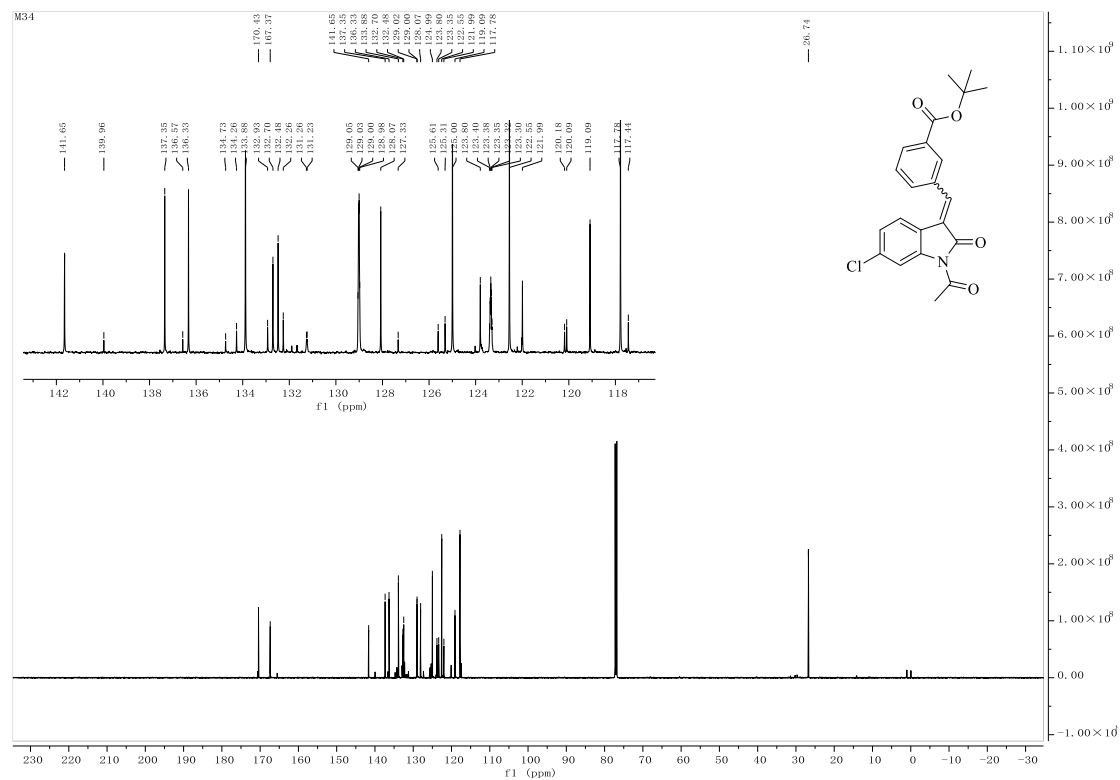

**Figure S20-2.** <sup>13</sup>C NMR spectrum (150 MHz, CDCl<sub>3</sub>) of compound 4t

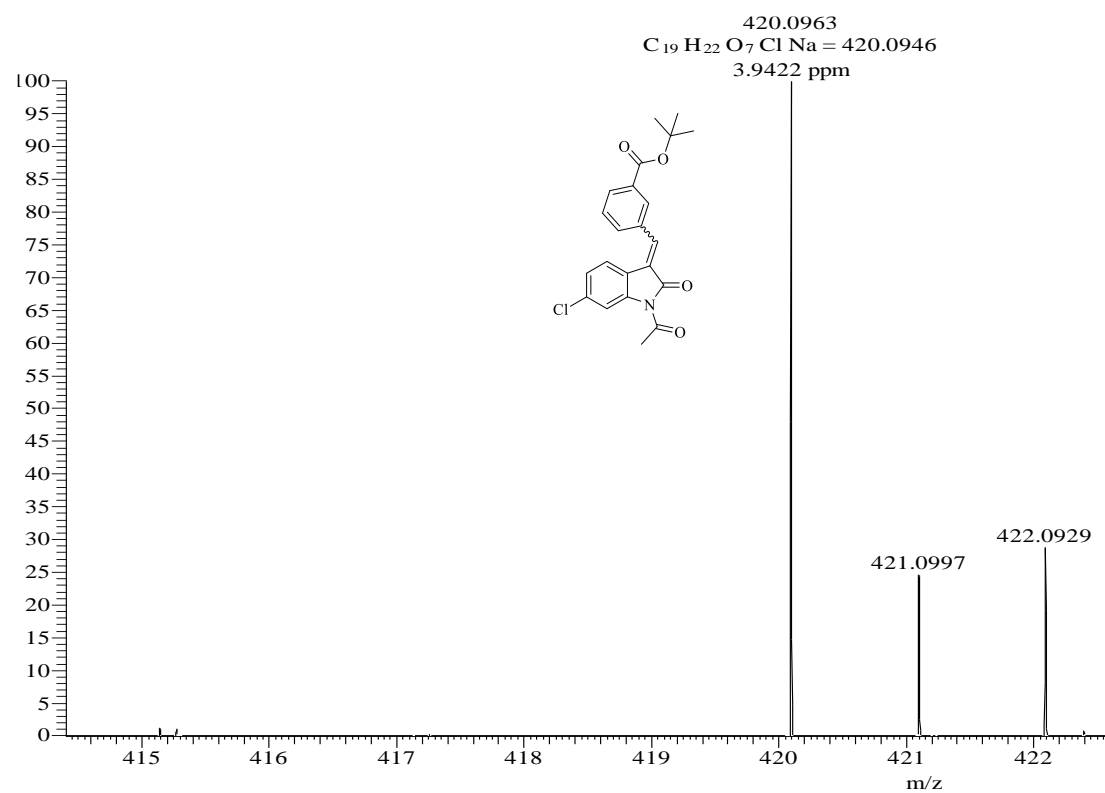

**Figure S20-2.** HRMS of compound **4t**

MP: 1, f1d

Chemical structure of compound 10: CC(=O)N1C(=O)C(=C(c2ccc(OC(F)(F)F)cc2))c3ccc(Cl)cc31

<sup>1</sup>H NMR spectrum (CDCl<sub>3</sub>) of compound 10. The x-axis represents the chemical shift in ppm (f1), ranging from 0 to 8.5. The y-axis represents the intensity, ranging from -1,000,000 to 14,000,000. The spectrum shows several peaks, with integration values provided for some of them: 1.00, 1.11, 1.05, 1.28, 0.80, 1.04, 1.33, 1.53, 3.26, and 0.73. The chemical structure of compound 10 is shown as an inset.

MP, 2. f1d

141.22 139.49 136.95 136.58 136.53 136.12 135.77 134.88 130.60 130.19 129.72 127.48 126.50 124.81 123.87 123.77 123.61 122.94 122.73 122.53 121.28 170.61 167.89 141.22 136.58 136.54 136.12 130.60 127.48 126.50 124.81 122.94 122.53 121.28 119.53 117.49 26.80

f1 (ppm)

f1 (ppm)

Chemical structure of compound 10b: COc1ccc(cc1C(=O)N2C(=O)c3cc(Cl)ccc3N2C(=O)c4ccccc4OC(F)(F)F)OC(F)(F)F

43

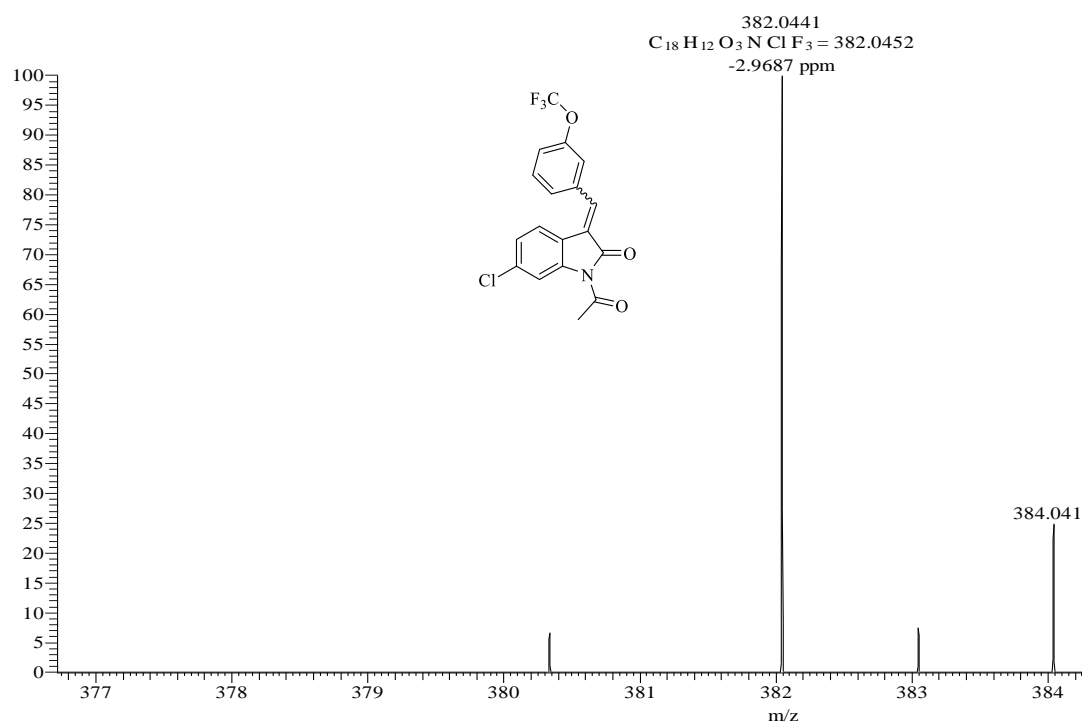

**Figure S21-3.** HRMS of compound **4u**



1-Acetyl-6-chloro-3-(pyridin-4-ylmethylene)indolin-2-one(4v)

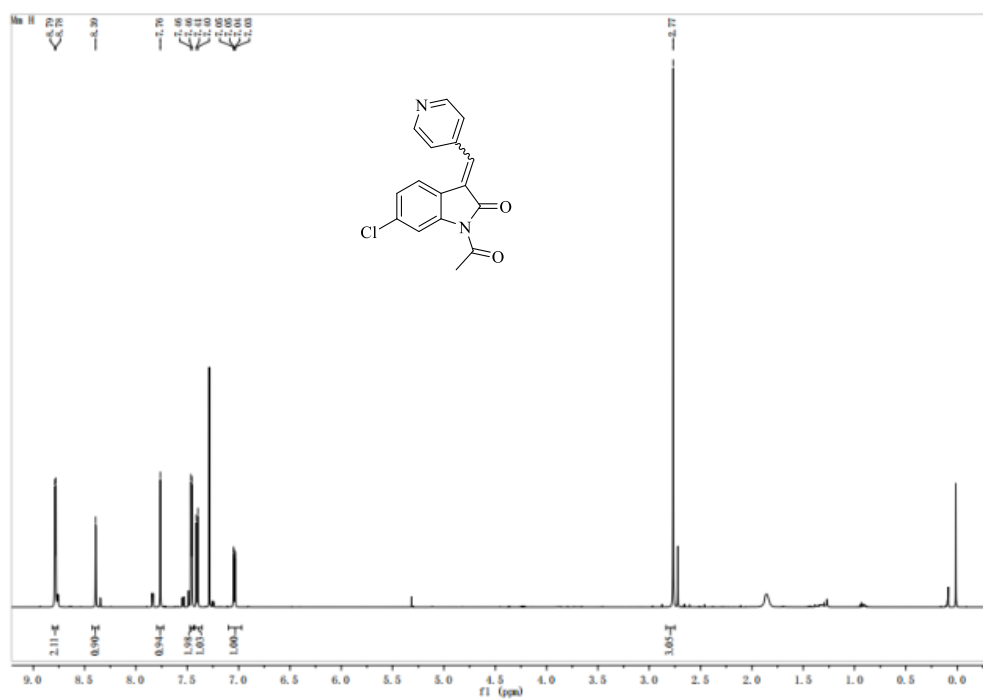

Figure S22-1. <sup>1</sup>H NMR spectrum (600 MHz, CDCl<sub>3</sub>) of compound 4v

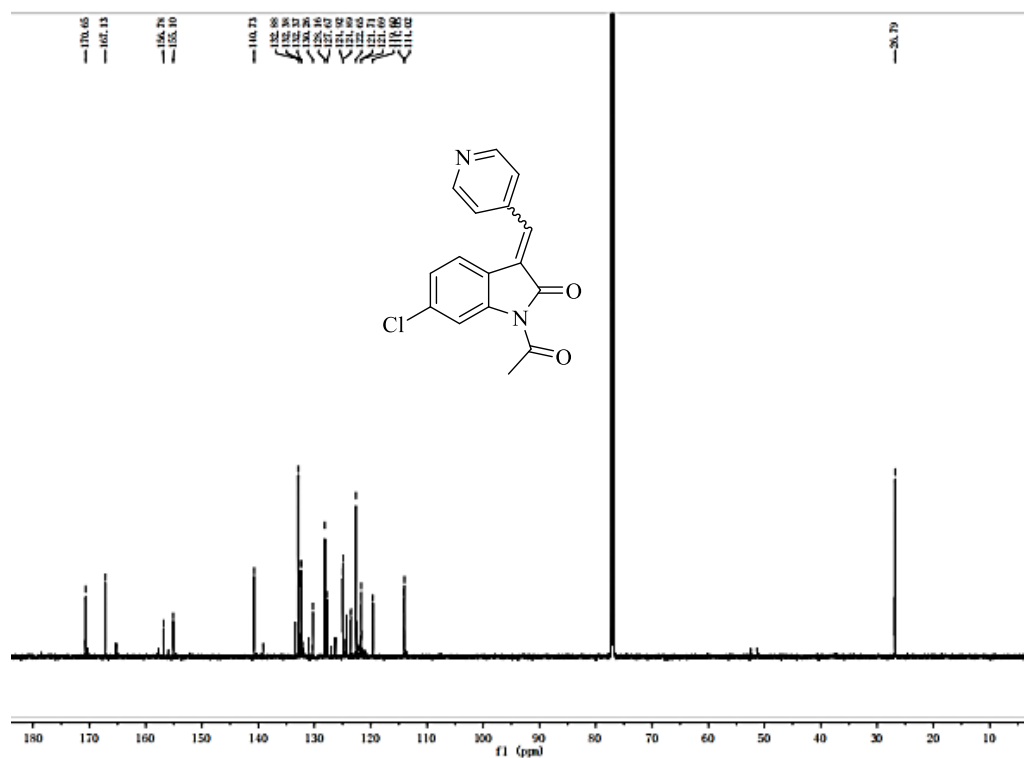

Figure S22-2. <sup>13</sup>C NMR spectrum (150 MHz, CDCl<sub>3</sub>) of compound 4v

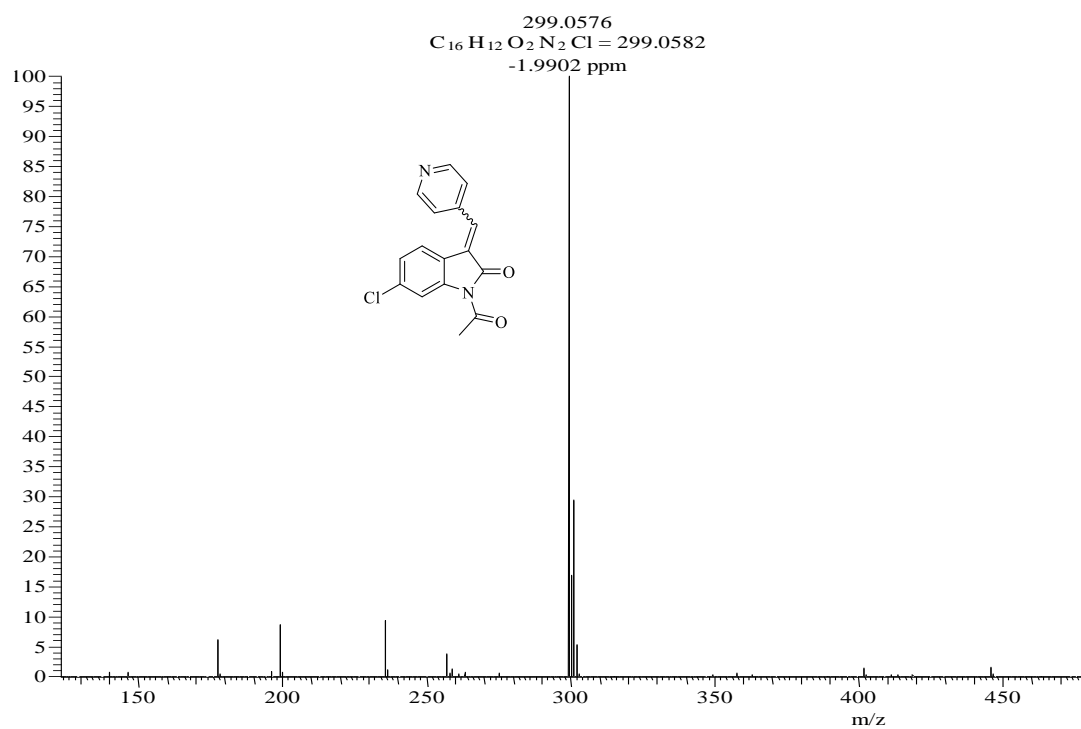

**Figure S22-3.** HRMS of compound **4v**

**1H NMR spectrum of compound 10 in CDCl<sub>3</sub>.**

**Chemical structure of compound 10:** CC(=O)N1C(=O)C=Cc2ccc(C(F)(F)F)cn2c1

**1H NMR data (ppm):**

- 8.35 (d, 0.91H)
- 8.22 (d, 1.00H)
- 7.76 (d, 1.12H)
- 7.50 (d, 1.05H)
- 7.29 (s, 1.05H)
- 7.24 (s, 1.05H)
- 7.23 (s, 1.05H)
- 7.22 (s, 1.05H)
- 7.21 (s, 1.05H)
- 7.20 (s, 1.05H)
- 7.19 (s, 1.05H)
- 7.18 (s, 1.05H)
- 7.17 (s, 1.05H)
- 7.16 (s, 1.05H)
- 7.15 (s, 1.05H)
- 7.14 (s, 1.05H)
- 7.13 (s, 1.05H)
- 7.12 (s, 1.05H)
- 7.11 (s, 1.05H)
- 7.10 (s, 1.05H)
- 7.09 (s, 1.05H)
- 7.08 (s, 1.05H)
- 7.07 (s, 1.05H)
- 7.06 (s, 1.05H)
- 7.05 (s, 1.05H)
- 7.04 (s, 1.05H)
- 7.03 (s, 1.05H)
- 7.02 (s, 1.05H)
- 7.01 (s, 1.05H)
- 7.00 (s, 1.05H)
- 6.99 (s, 1.05H)
- 6.98 (s, 1.05H)
- 6.97 (s, 1.05H)
- 6.96 (s, 1.05H)
- 6.95 (s, 1.05H)
- 6.94 (s, 1.05H)
- 6.93 (s, 1.05H)
- 6.92 (s, 1.05H)
- 6.91 (s, 1.05H)
- 6.90 (s, 1.05H)
- 6.89 (s, 1.05H)
- 6.88 (s, 1.05H)
- 6.87 (s, 1.05H)
- 6.86 (s, 1.05H)
- 6.85 (s, 1.05H)
- 6.84 (s, 1.05H)
- 6.83 (s, 1.05H)
- 6.82 (s, 1.05H)
- 6.81 (s, 1.05H)
- 6.80 (s, 1.05H)
- 6.79 (s, 1.05H)
- 6.78 (s, 1.05H)
- 6.77 (s, 1.05H)
- 6.76 (s, 1.05H)
- 6.75 (s, 1.05H)
- 6.74 (s, 1.05H)
- 6.73 (s, 1.05H)
- 6.72 (s, 1.05H)
- 6.71 (s, 1.05H)
- 6.70 (s, 1.05H)
- 6.69 (s, 1.05H)
- 6.68 (s, 1.05H)
- 6.67 (s, 1.05H)
- 6.66 (s, 1.05H)
- 6.65 (s, 1.05H)
- 6.64 (s, 1.05H)
- 6.63 (s, 1.05H)
- 6.62 (s, 1.05H)
- 6.61 (s, 1.05H)
- 6.60 (s, 1.05H)
- 6.59 (s, 1.05H)
- 6.58 (s, 1.05H)
- 6.57 (s, 1.05H)
- 6.56 (s, 1.05H)
- 6.55 (s, 1.05H)
- 6.54 (s, 1.05H)
- 6.53 (s, 1.05H)
- 6.52 (s, 1.05H)
- 6.51 (s, 1.05H)
- 6.50 (s, 1.05H)
- 6.49 (s, 1.05H)
- 6.48 (s, 1.05H)
- 6.47 (s, 1.05H)
- 6.46 (s, 1.05H)
- 6.45 (s, 1.05H)
- 6.44 (s, 1.05H)
- 6.43 (s, 1.05H)
- 6.42 (s, 1.05H)
- 6.41 (s, 1.05H)
- 6.40 (s, 1.05H)
- 6.39 (s, 1.05H)
- 6.38 (s, 1.05H)
- 6.37 (s, 1.05H)
- 6.36 (s, 1.05H)
- 6.35 (s, 1.05H)
- 6.34 (s, 1.05H)
- 6.33 (s, 1.05H)
- 6.32 (s, 1.05H)
- 6.31 (s, 1.05H)
- 6.30 (s, 1.05H)
- 6.29 (s, 1.05H)
- 6.28 (s, 1.05H)
- 6.27 (s, 1.05H)
- 6.26 (s, 1.05H)
- 6.25 (s, 1.05H)
- 6.24 (s, 1.05H)
- 6.23 (s, 1.05H)
- 6.22 (s, 1.05H)
- 6.21 (s, 1.05H)
- 6.20 (s, 1.05H)
- 6.19 (s, 1.05H)
- 6.18 (s, 1.05H)
- 6.17 (s, 1.05H)
- 6.16 (s, 1.05H)
- 6.15 (s, 1.05H)
- 6.14 (s, 1.05H)
- 6.13 (s, 1.05H)
- 6.12 (s, 1.05H)
- 6.11 (s, 1.05H)
- 6.10 (s, 1.05H)
- 6.09 (s, 1.05H)
- 6.08 (s, 1.05H)
- 6.07 (s, 1.05H)
- 6.06 (s, 1.05H)
- 6.05 (s, 1.05H)
- 6.04 (s, 1.05H)
- 6.03 (s, 1.05H)
- 6.02 (s, 1.05H)
- 6.01 (s, 1.05H)
- 6.00 (s, 1.05H)
- 5.99 (s, 1.05H)
- 5.98 (s, 1.05H)
- 5.97 (s, 1.05H)
- 5.96 (s, 1.05H)
- 5.95 (s, 1.05H)
- 5.94 (s, 1.05H)
- 5.93 (s, 1.05H)
- 5.92 (s, 1.05H)
- 5.91 (s, 1.05H)
- 5.90 (s, 1.05H)
- 5.89 (s, 1.05H)
- 5.88 (s, 1.05H)
- 5.87 (s, 1.05H)
- 5.86 (s, 1.05H)
- 5.85 (s, 1.05H)
- 5.84 (s, 1.05H)
- 5.83 (s, 1.05H)
- 5.82 (s, 1.05H)
- 5.81 (s, 1.05H)
- 5.80 (s, 1.05H)
- 5.79 (s, 1.05H)
- 5.78 (s, 1.05H)
- 5.77 (s, 1.05H)
- 5.76 (s, 1.05H)
- 5.75 (s, 1.05H)
- 5.74 (s, 1.05H)
- 5.73 (s, 1.05H)
- 5.72 (s, 1.05H)
- 5.71 (s, 1.05H)
- 5.70 (s, 1.05H)
- 5.69 (s, 1.05H)
- 5.68 (s, 1.05H)
- 5.67 (s, 1.05H)
- 5.66 (s, 1.05H)
- 5.65 (s, 1.05H)
- 5.64 (s, 1.05H)
- 5.63 (s, 1.05H)
- 5.62 (s, 1.05H)
- 5.61 (s, 1.05H)
- 5.60 (s, 1.05H)
- 5.59 (s, 1.05H)
- 5.58 (s, 1.05H)
- 5.57 (s, 1.05H)
- 5.56 (s, 1.05H)
- 5.55 (s, 1.05H)
- 5.54 (s, 1.05H)
- 5.53 (s, 1.05H)
- 5.52 (s, 1.05H)
- 5.51 (s, 1.05H)
- 5.50 (s, 1.05H)
- 5.49 (s, 1.05H)
- 5.48 (s, 1.05H)
- 5.47 (s, 1.05H)
- 5.46 (s, 1.05H)
- 5.45 (s, 1.05H)
- 5.44 (s, 1.05H)
- 5.43 (s, 1.05H)
- 5.42 (s, 1.05H)
- 5.41 (s, 1.05H)
- 5.40 (s, 1.05H)
- 5.39 (s, 1.05H)
- 5.38 (s, 1.05H)
- 5.37 (s, 1.05H)
- 5.36 (s, 1.05H)
- 5.35 (s, 1.05H)
- 5.34 (s, 1.05H)
- 5.33 (s, 1.05H)
- 5.32 (s, 1.05H)
- 5.31 (s, 1.05H)
- 5.30 (s, 1.05H)
- 5.29 (s, 1.05H)
- 5.28 (s, 1.05H)
- 5.27 (s, 1.05H)
- 5.26 (s, 1.05H)
- 5.25 (s, 1.05H)
- 5.24 (s, 1.05H)
- 5.23 (s, 1.05H)
- 5.22 (s, 1.05H)
- 5.21 (s, 1.05H)
- 5.20 (s, 1.05H)
- 5.19 (s, 1.05H)
- 5.18 (s, 1.05H)
- 5.17 (s, 1.05H)
- 5.16 (s, 1.05H)
- 5.15 (s, 1.05H)
- 5.14 (s, 1.05H)
- 5.13 (s, 1.05H)
- 5.12 (s, 1.05H)
- 5.11 (s, 1.05H)
- 

Mr. 2. f1d

139.45, 136.24, 135.82, 133.43, 133.38, 131.35, 130.48, 128.81, 128.81, 128.81, 125.34, 125.15, 124.83, 124.63, 123.91, 123.68, 122.94, 122.68, 119.69, 119.36, 119.21, 117.56, 117.31, 117.15, 117.01, 170.80, 165.77, 158.52, 156.87, 26.88, 26.80

CF<sub>3</sub>

Cl

13C NMR (ppm): 139.45, 136.24, 135.82, 133.43, 133.38, 131.35, 130.48, 128.81, 125.34, 125.15, 124.83, 124.63, 123.91, 123.68, 122.94, 122.68, 119.69, 119.36, 119.21, 117.56, 117.31, 117.15, 117.01, 170.80, 165.77, 158.52, 156.87, 26.88, 26.80

Chemical structure: 2-chloro-3-(4-(trifluoromethyl)phenyl)indolizin-5(1H)-one

47

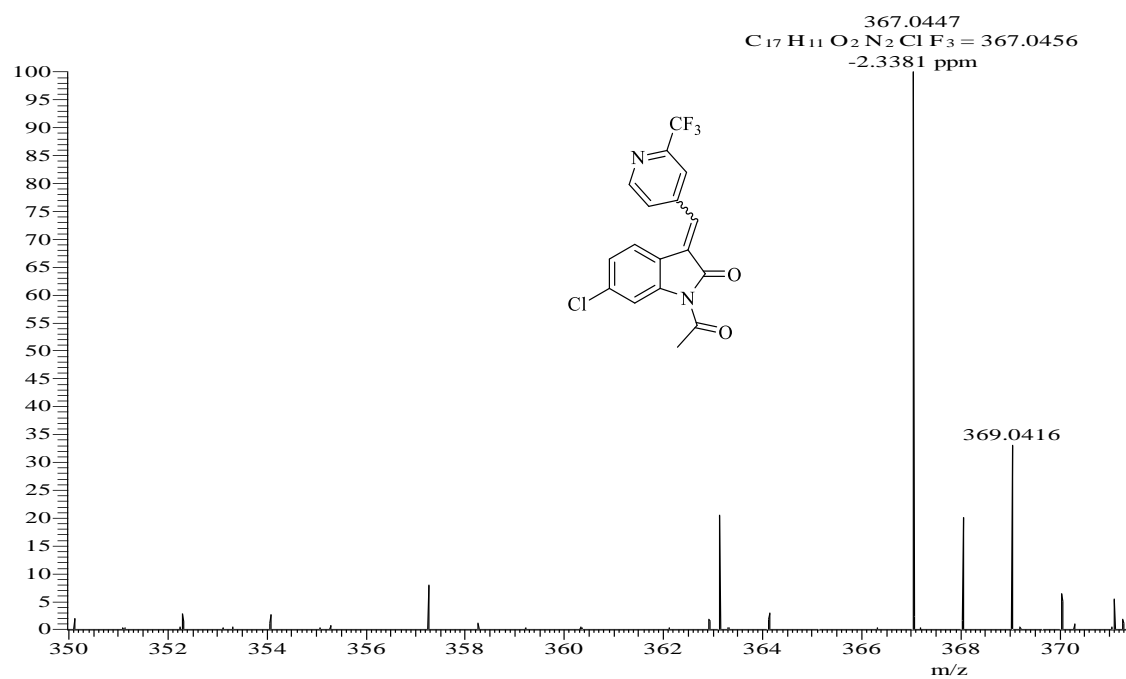

Figure S23-3. HRMS of compound 4w

***Tert*-butyl 4-((1-acetyl-6-chloro-2-oxoindolin-3-ylidene)methyl)benzoate(4x)**

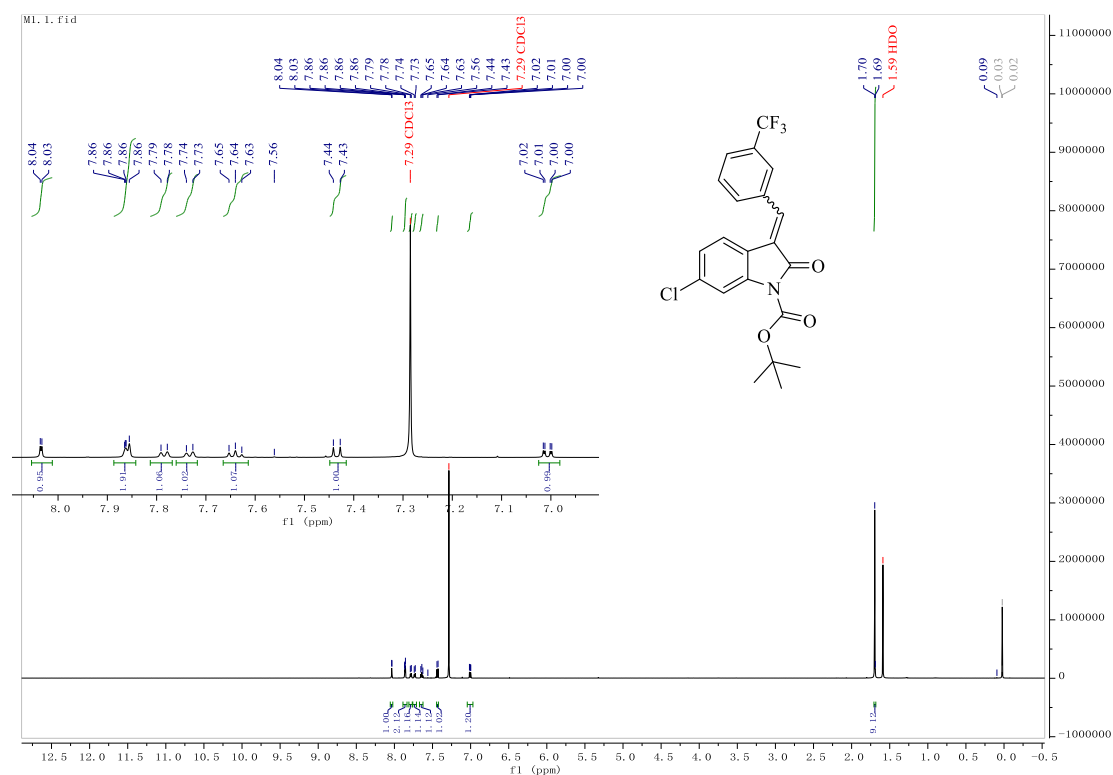

**Figure S24-1.** <sup>1</sup>H NMR spectrum (600 MHz, CDCl<sub>3</sub>) of compound 4x

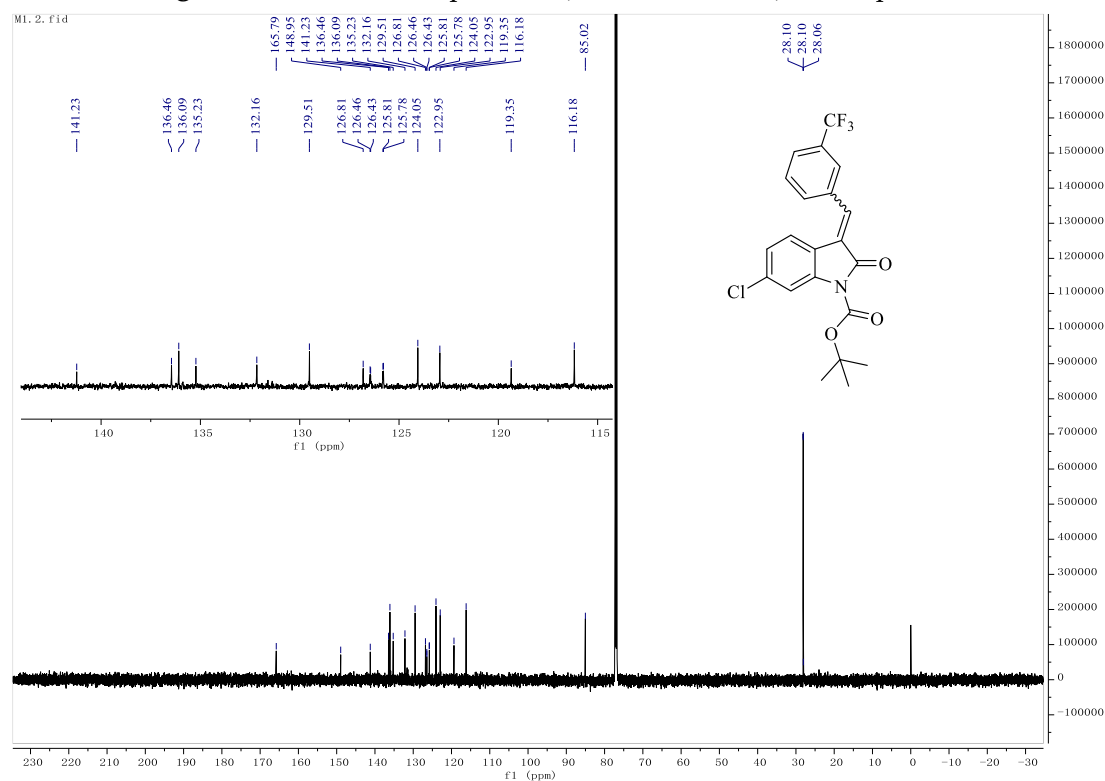

**Figure S24-2.** <sup>13</sup>C NMR spectrum (150 MHz, CDCl<sub>3</sub>) of compound 4x

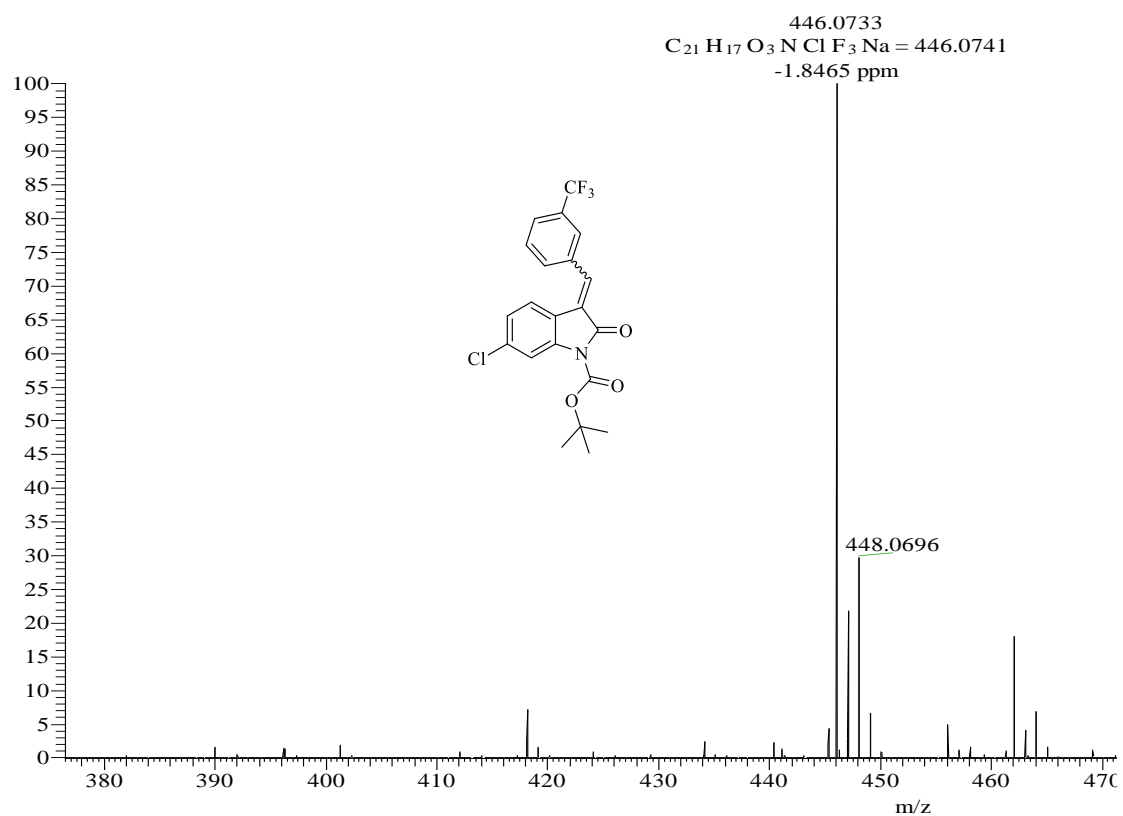

**Figure S24-3.** HRMS of compound 4x

**4-Nitro-N-(2-oxo-3-(3-(trifluoromethyl)benzylidene)indolin-5-yl)benzenesulfonamide (9d)**

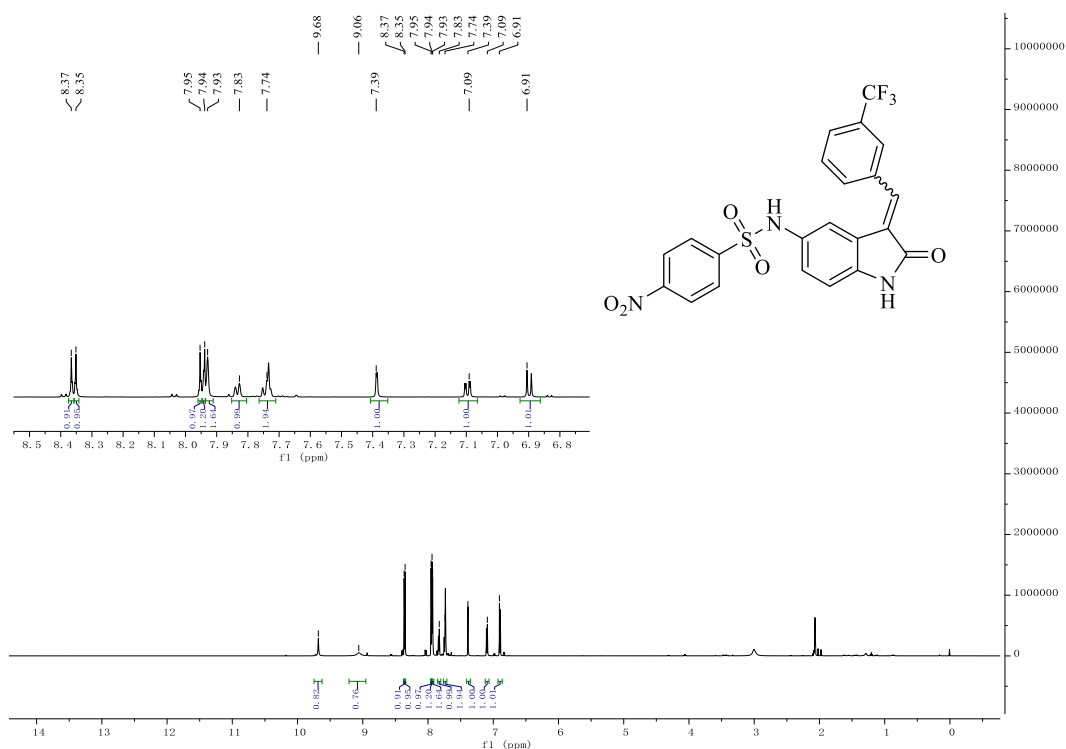

**Figure S25-1.** <sup>1</sup>H NMR spectrum (600 Hz, Acetone) of compound 9d

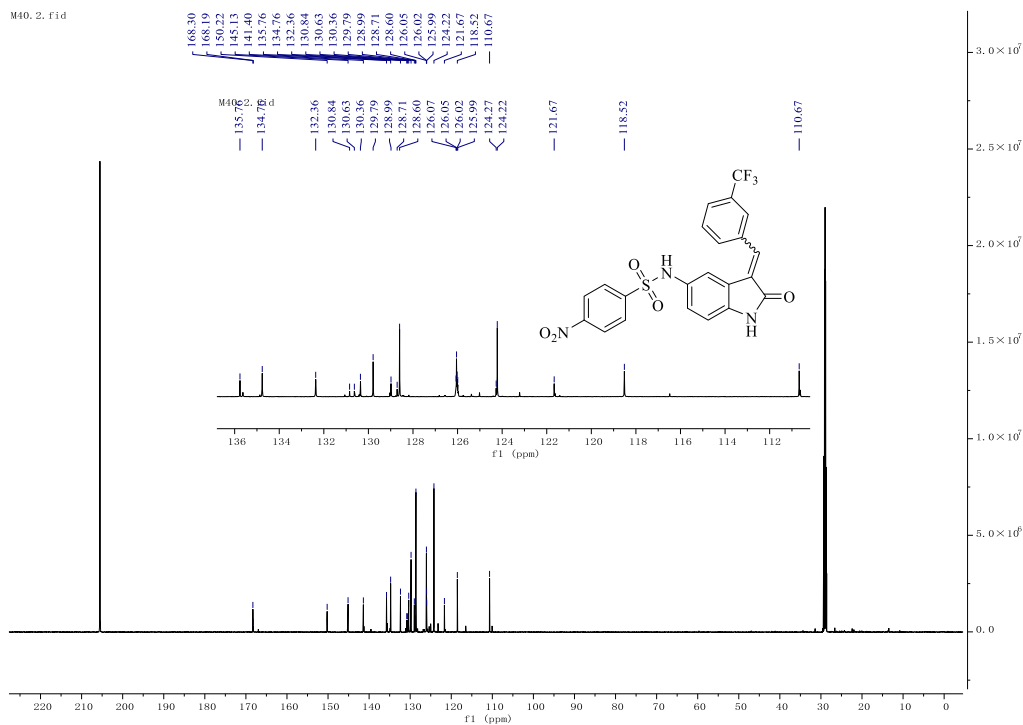

**Figure S25-2.** <sup>13</sup>C NMR spectrum (150 Hz, Acetone) of compound 9d

M40 #20 RT: 0.09 AV: 1 NL: 6.14E6  
T: FTMS + p ESI Full ms [100.0000-1500.0000]

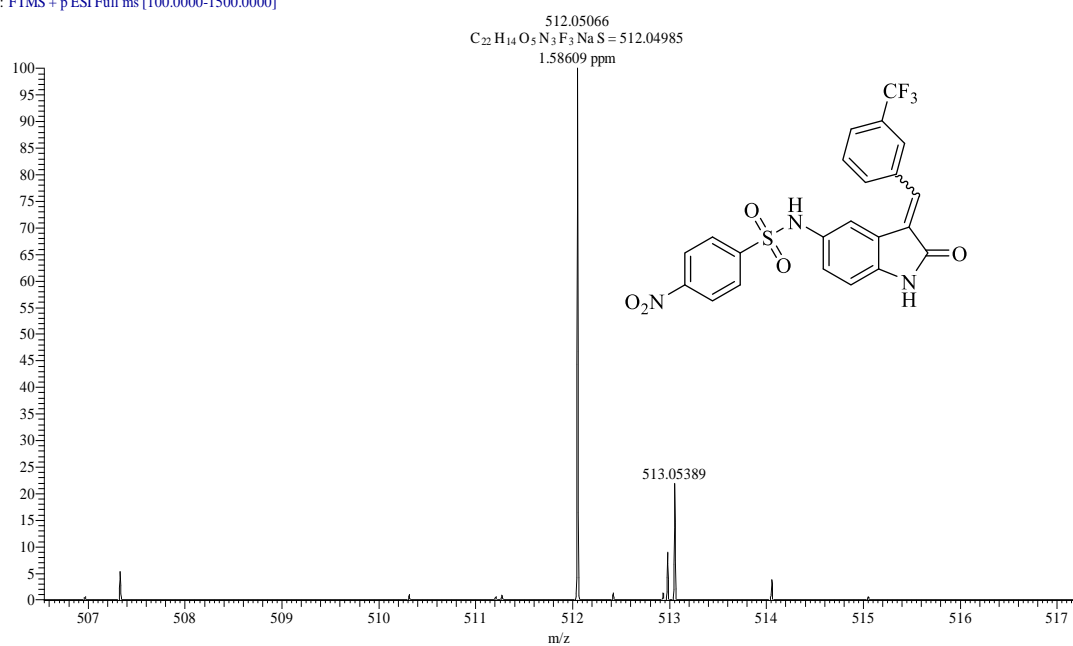

Figure S25-3. HRMS of compound 9d



nitro-N-(2-oxo-3-(3-(trifluoromethyl)benzylidene)indolin-5-yl)benzenesulfonamide(**9a**)

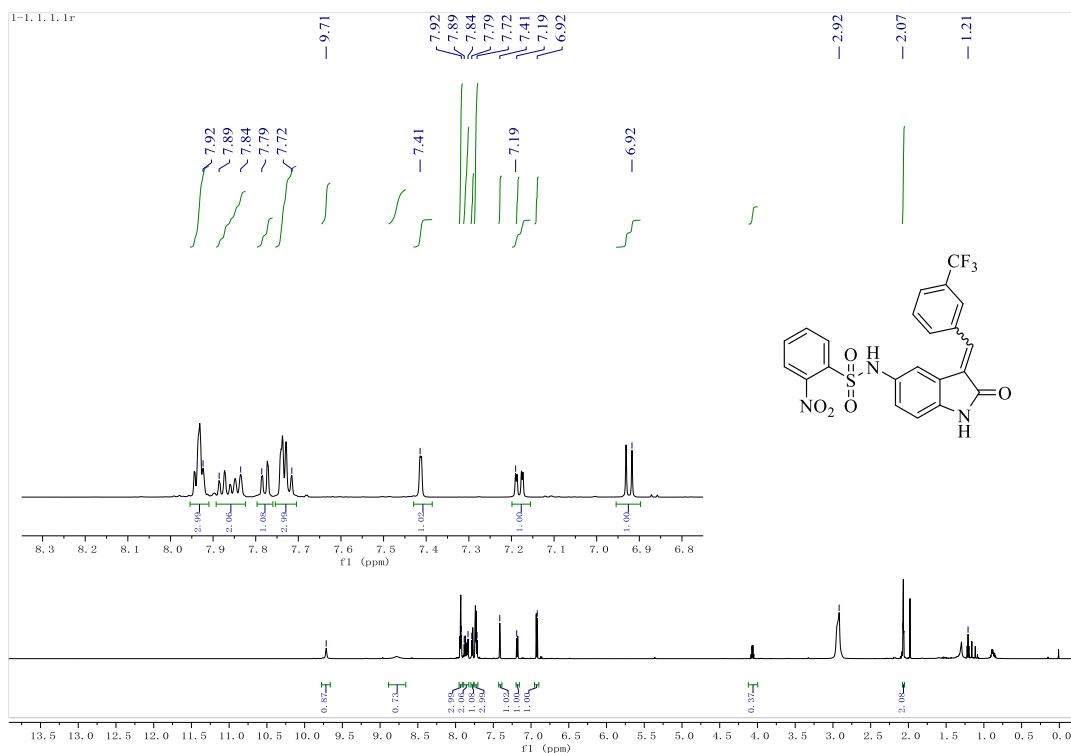

**Figure S26-1.** <sup>1</sup>H NMR spectrum (600 Hz, CD<sub>3</sub>COCD<sub>3</sub>) of compound **9a**

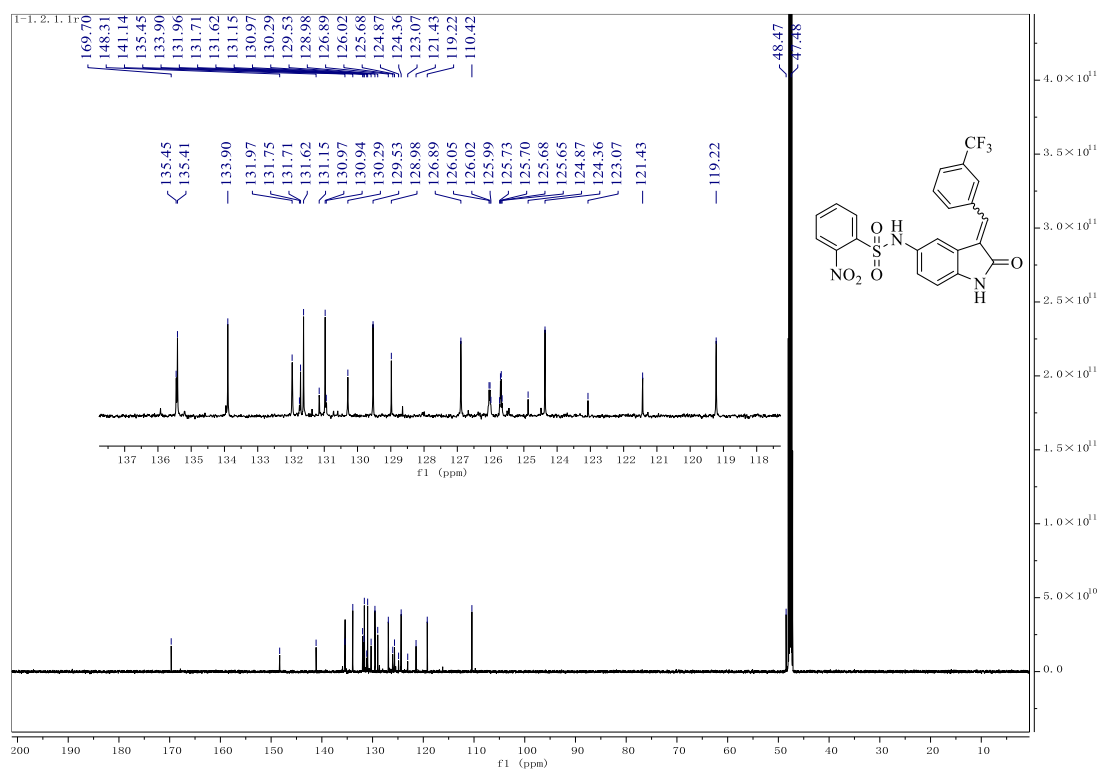

**Figure S26-2.** <sup>13</sup>C NMR spectrum (150 Hz, CD<sub>3</sub>OD) of compound **9a**

1-1 #22 RT: 0.10 AV: 1 NL: 5.14E8  
T: FTMS + p ESI Full ms [100.0000-1500.0000]

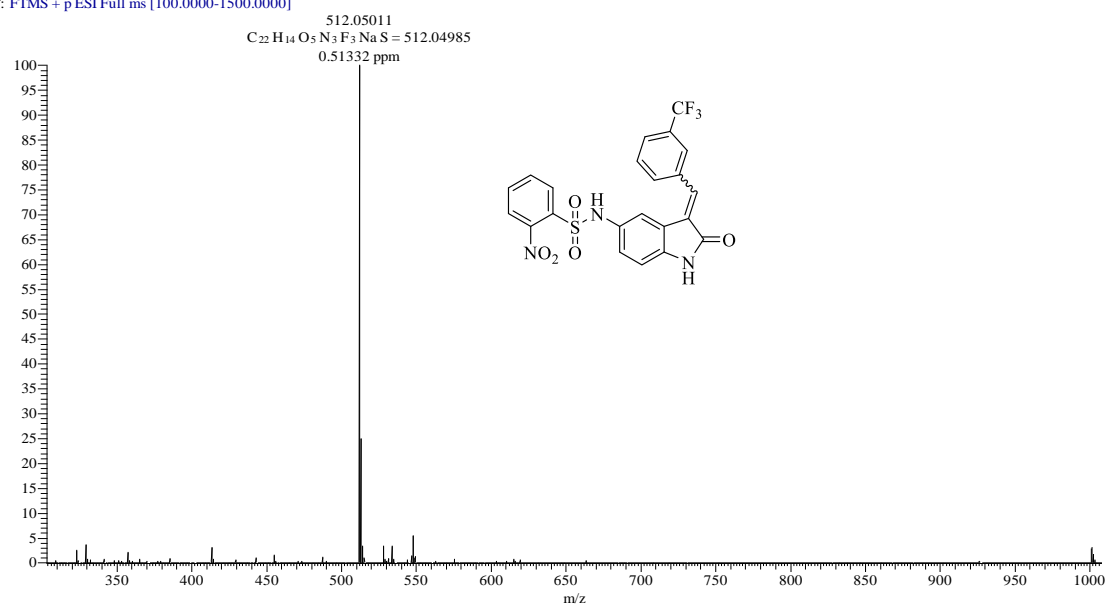

**Figure S26-3.** HRMS of compound **9a**

**2,4-Difluoro-N-(2-oxo-3-(3-(trifluoromethyl)benzylidene)indolin-5-yl)benzenesulfonamide (9b)**

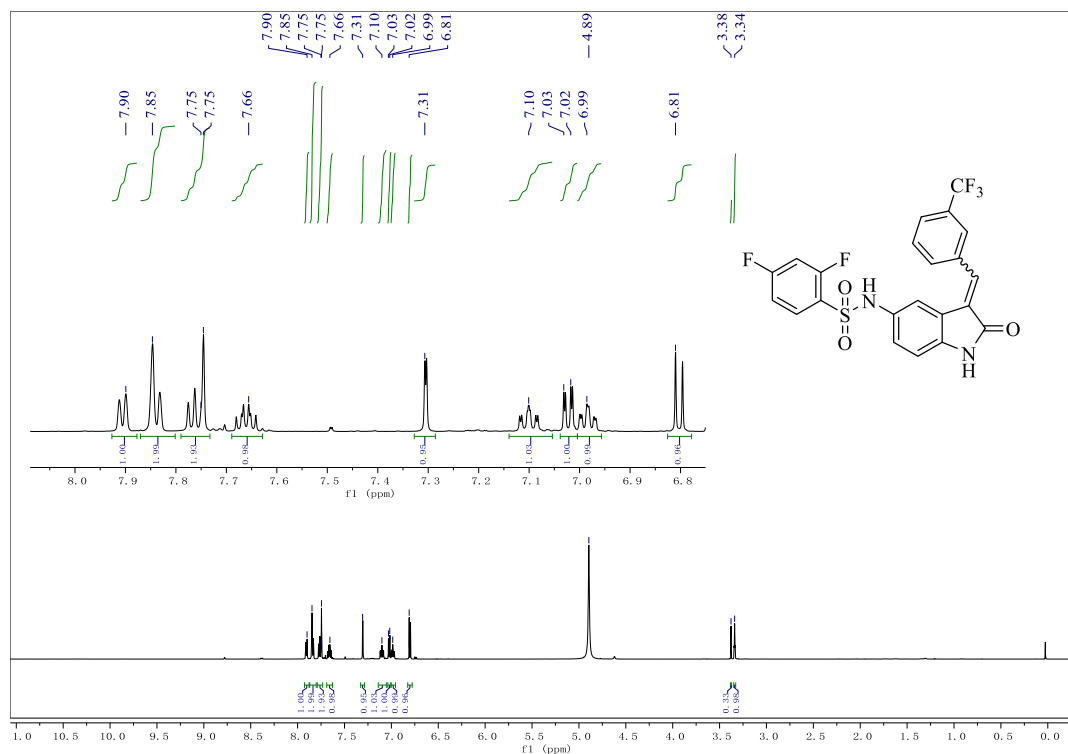

**Figure S27-1.** <sup>1</sup>H, NMR spectrum (150 Hz, CD<sub>3</sub>OD) of compound **9b**

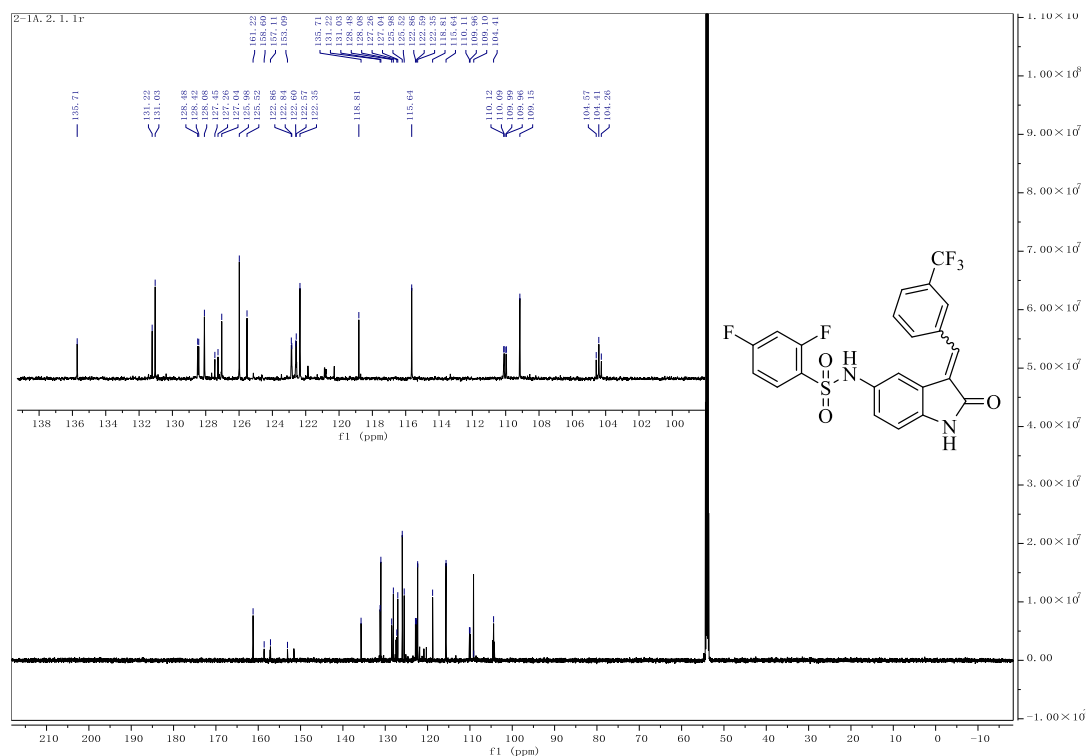

**Figure S27-2.** <sup>13</sup>C NMR spectrum (150 Hz, CD<sub>3</sub>OD) of compound **9b**

2-1-A #22 RT: 0.10 AV: 1 NL: 9.62E8  
T: FTMS + p ESI Full ms [100.0000-1500.0000]

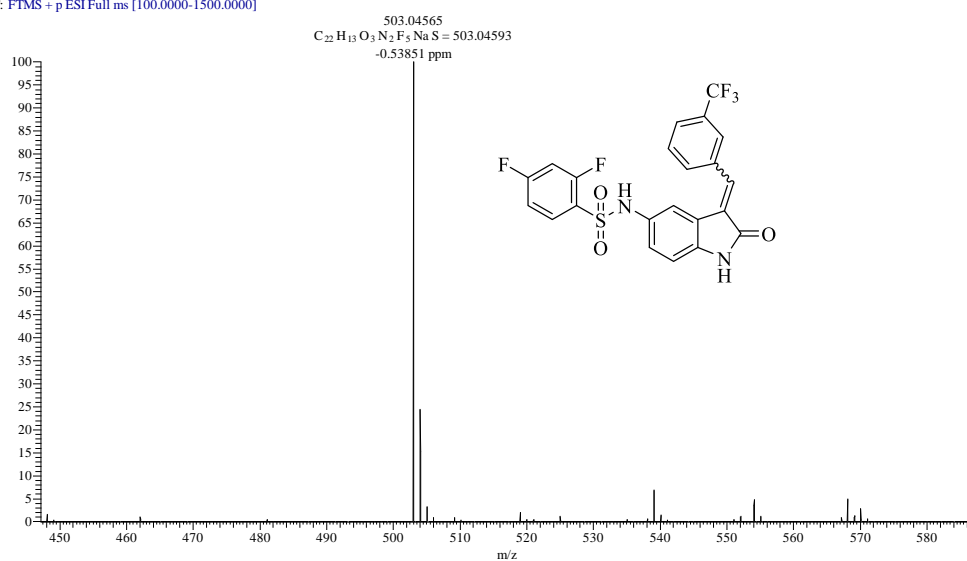

**Figure S27-3.** HRMS of compound **9b**

**N-(2-oxo-3-(3-(trifluoromethyl)benzylidene)indolin-5-yl)ethanesulfonamide (9c)**

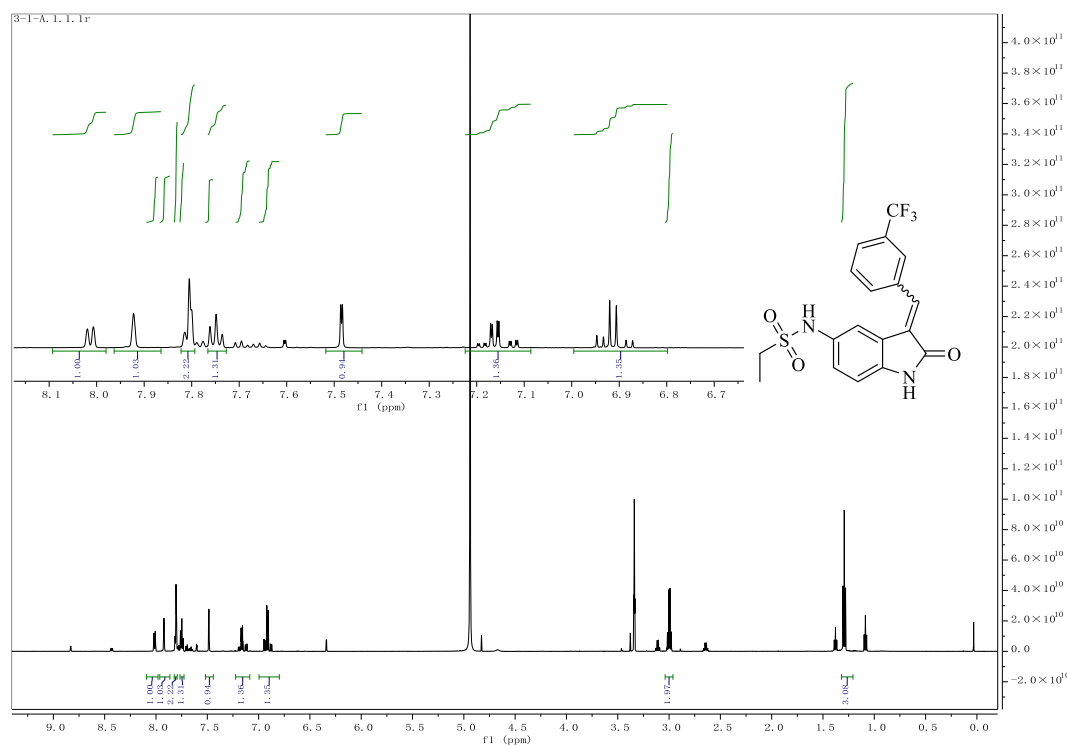

**Figure S28-1.** <sup>1</sup>H NMR spectrum (600 MHz, CD<sub>3</sub>OCD<sub>3</sub>) of compound 9c

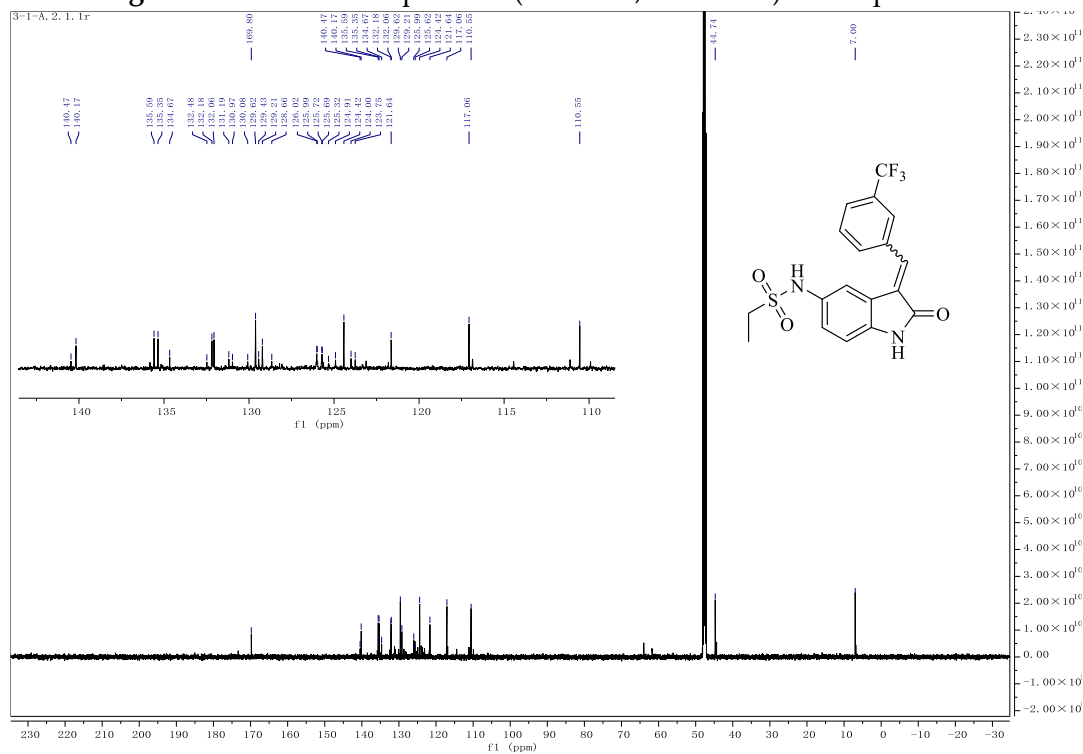

**Figure S28-2.** <sup>13</sup>C NMR spectrum (150 MHz, CD<sub>3</sub>OCD<sub>3</sub>) of compound 9c

3-1-A#23 RT: 0.10 AV: 1 NL: 6.18E8  
T: FTMS + p ESI Full ms [100.0000-1500.0000]

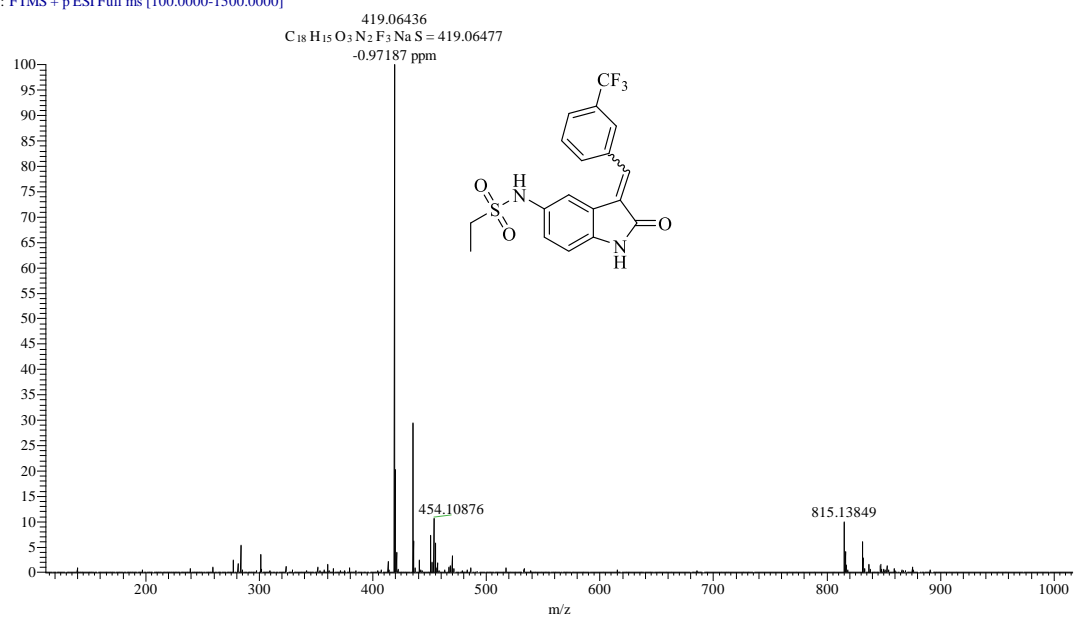

**Figure S28-3.** HRMS of compound 9c

N-(2-oxo-3-(3-(trifluoromethyl)benzylidene)indolin-5-yl)-1-phenylmethanesulfonamide  
(9e)

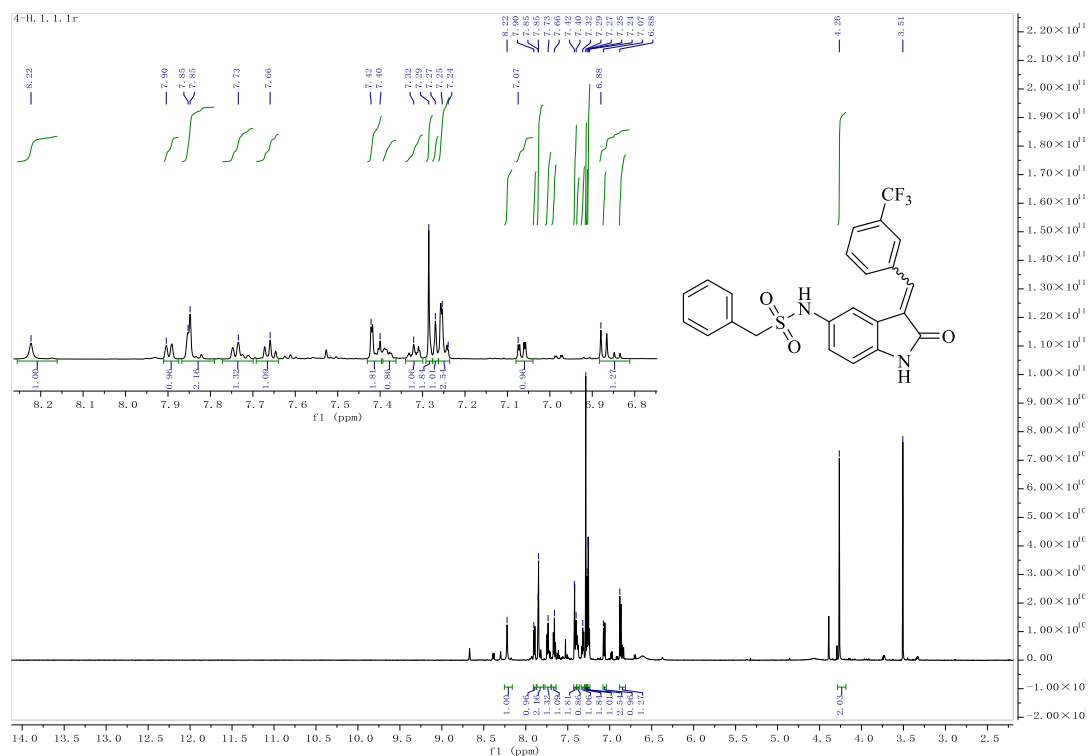

Figure S29-1. <sup>1</sup>H NMR spectrum (600 Hz, CDCl<sub>3</sub>) of compound 9e

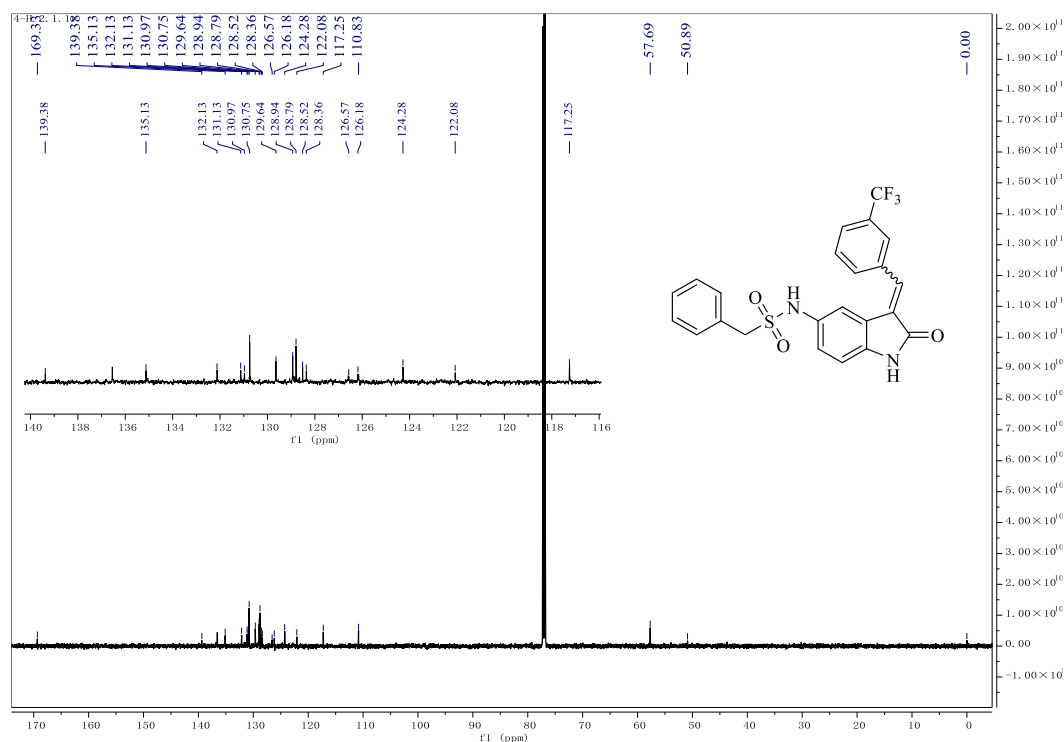

Figure S29-2. <sup>13</sup>C NMR spectrum (150 Hz, CDCl<sub>3</sub>) of compound 9e

4-1-1 #22 RT: 0.10 AV: 1 NL: 1.47E8  
T: FTMS + p ESI Full ms [100.0000-1500.0000]

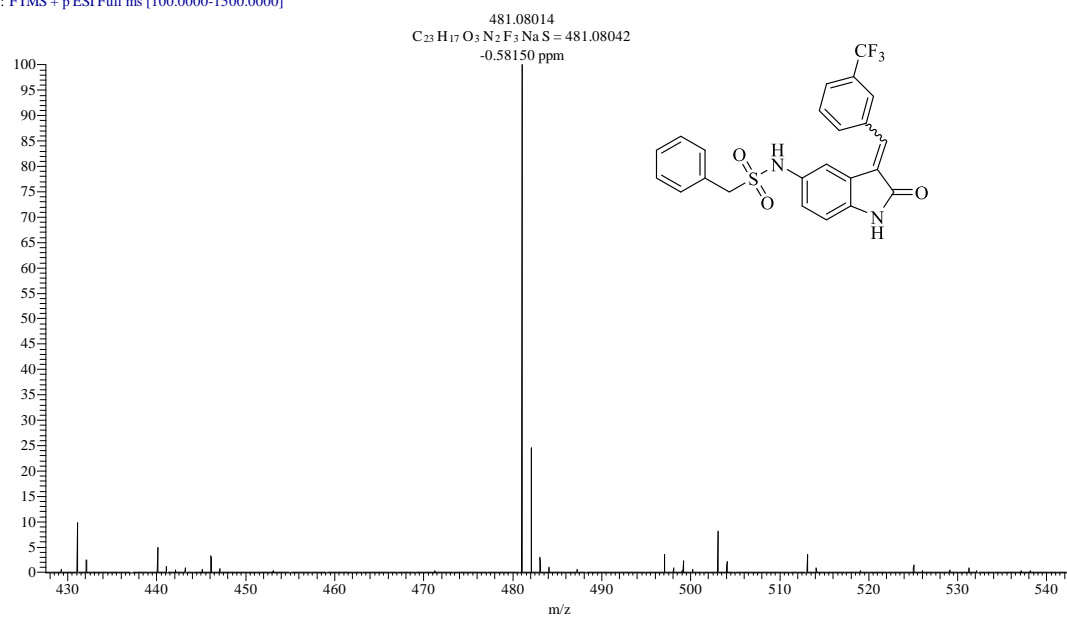

**Figure S29-2.** HRMS of compound **9e**



**(Z)-4-methyl-N-(2-oxo-3-(3-(trifluoromethyl)benzylidene)indolin-5-yl)benzenesulfonamide (9f)**

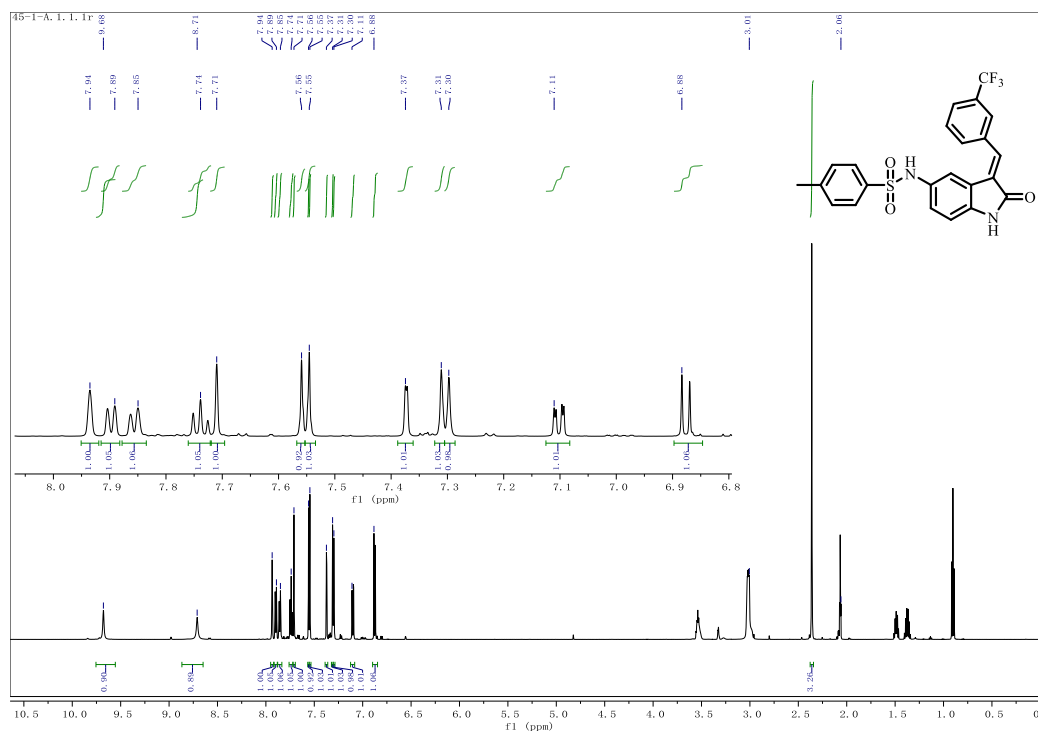

**Figure S30-1.** <sup>1</sup>H NMR spectrum (600 Hz, CD<sub>3</sub>OCD<sub>3</sub>) of compound 9f

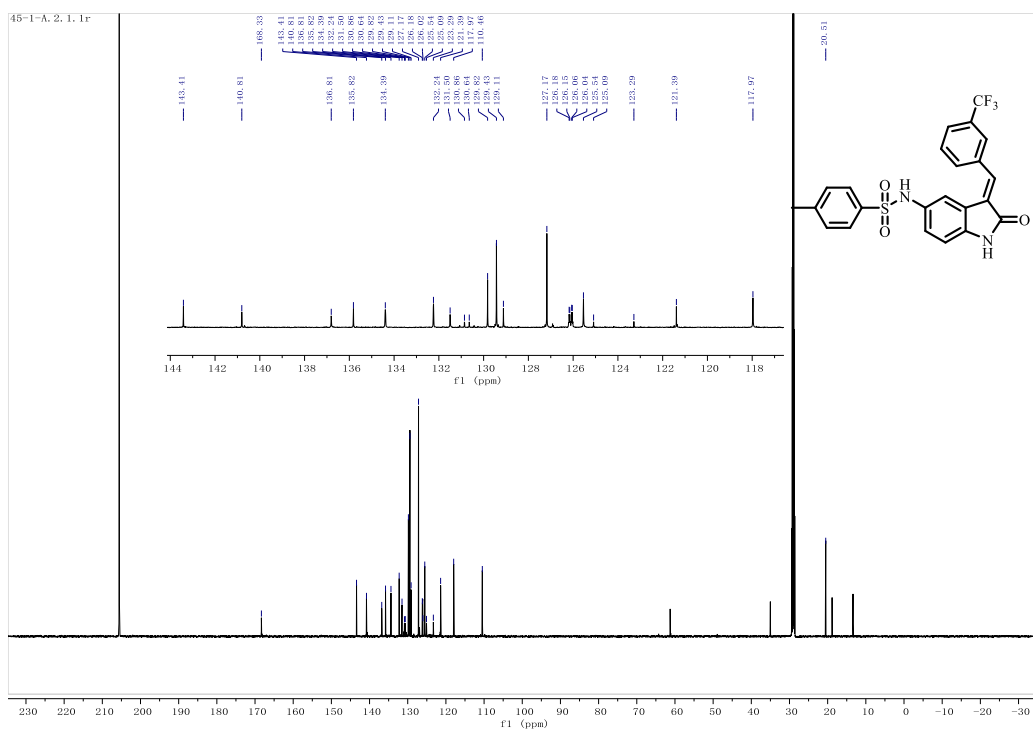

**Figure S30-2.** <sup>13</sup>C NMR spectrum (150 Hz, CD<sub>3</sub>OCD<sub>3</sub>) of compound 9f

45-1 #23 RT: 0.10 AV: 1 NL: 3.71E8  
T: FTMS + p ESI Full ms [100.0000-1500.0000]

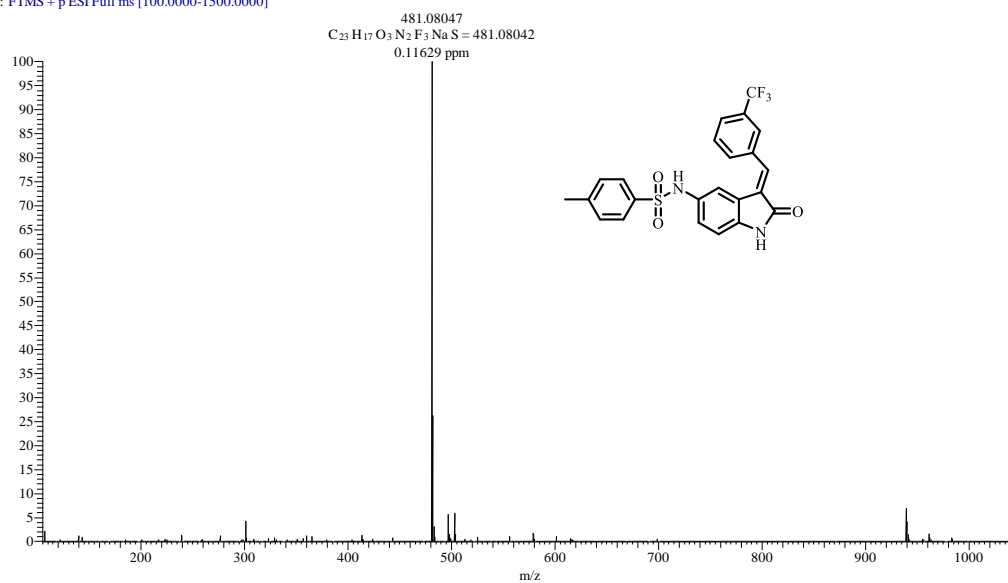

**Figure S30-2.** HRMS of compound **9f**

(*E*)-4-methyl-N-(2-oxo-3-(3-(trifluoromethyl)benzylidene)indolin-5-yl)benzenesulfonamide (**9g**).

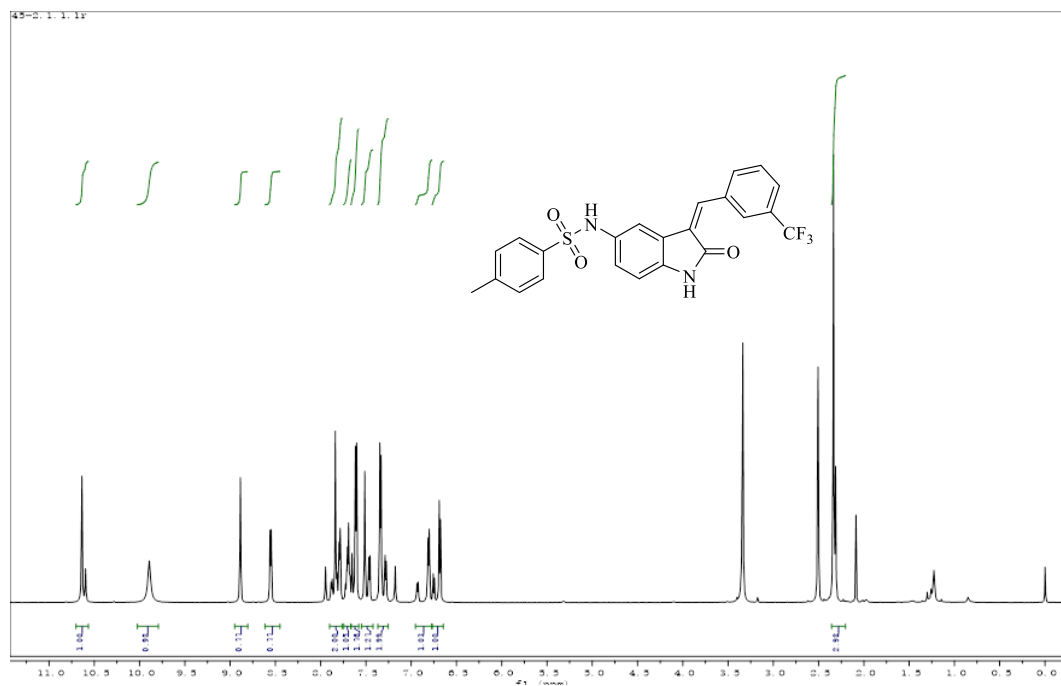

Figure S31-1. <sup>1</sup>H NMR spectrum (600 Hz, DMSO) of compound **9g**

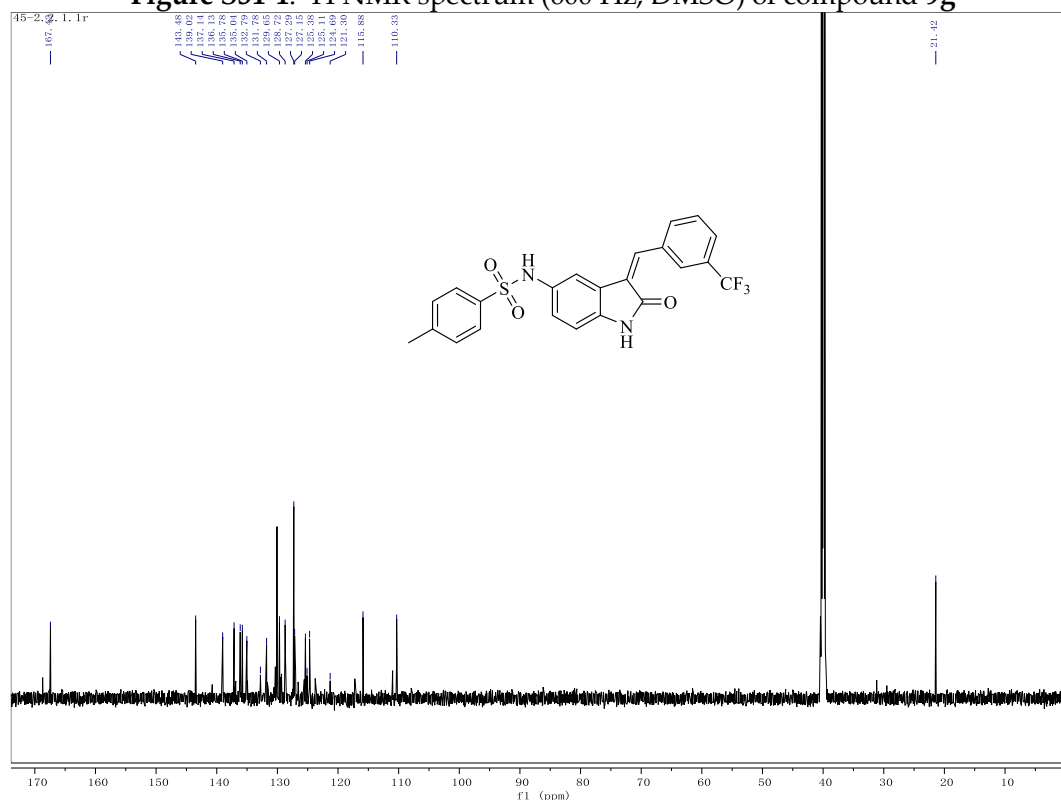

Figure S31-2. <sup>13</sup>C NMR spectrum (150 Hz, DMSO) of compound **9g**

45-2 #21 RT: 0.09 AV: 1 NL: 2.71E8  
T: FTMS + p ESI Full ms [100.0000-1500.0000]

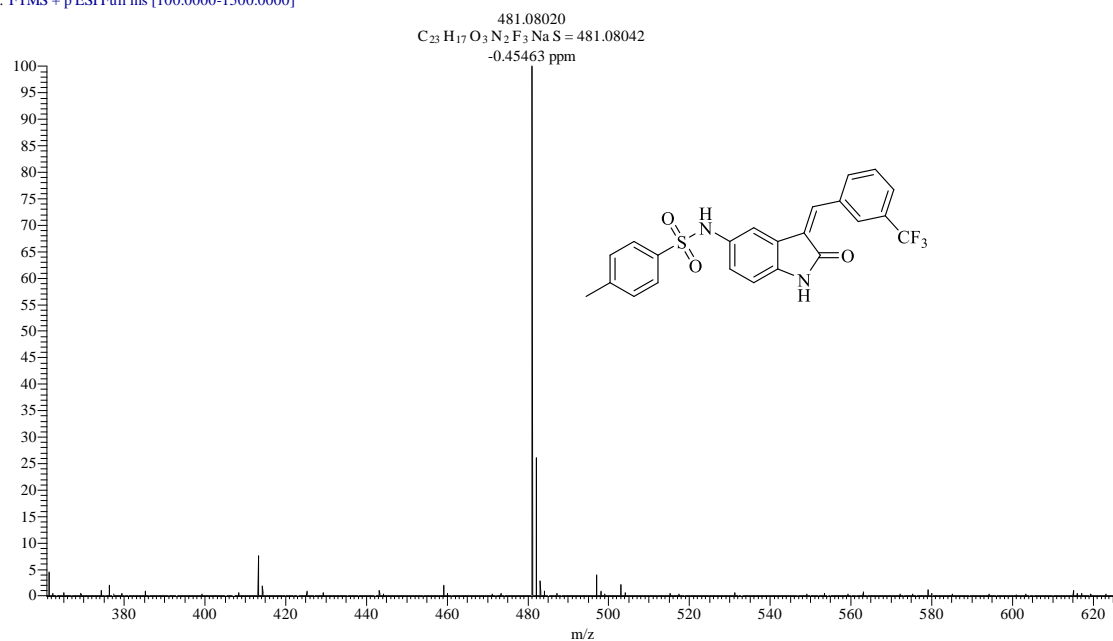

**Figure S31-2.** HRMS of compound **9g**

5-((3,5-bis(trifluoromethyl)benzylidene)amino)indolin-2-one (9i)

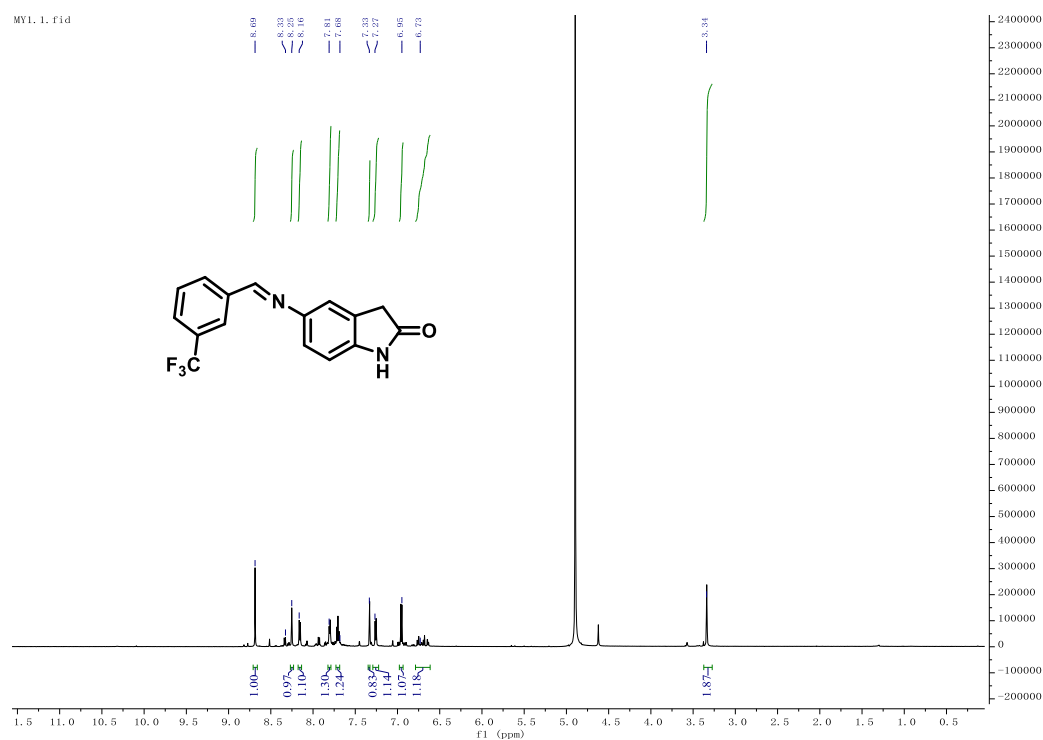

Figure S32-1.  $^1\text{H}$  NMR spectrum (600 Hz,  $\text{CD}_3\text{OD}$ ) of compound 9h

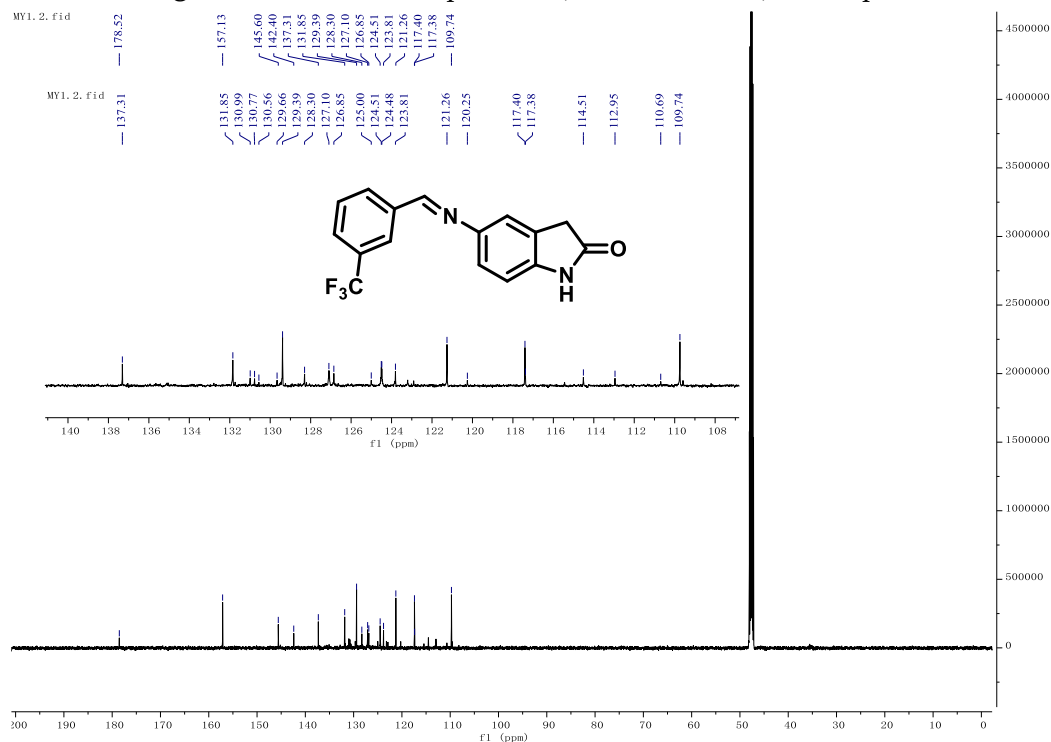

Figure S32-2.  $^{13}\text{C}$  NMR spectrum (150 MHz,  $\text{CD}_3\text{OD}$ ) of compound 9h

MY1 #25 RT: 0.11 AV: 1 NL: 6.51E6  
T: FTMS + p ESI Full ms [100.0000-1500.0000]

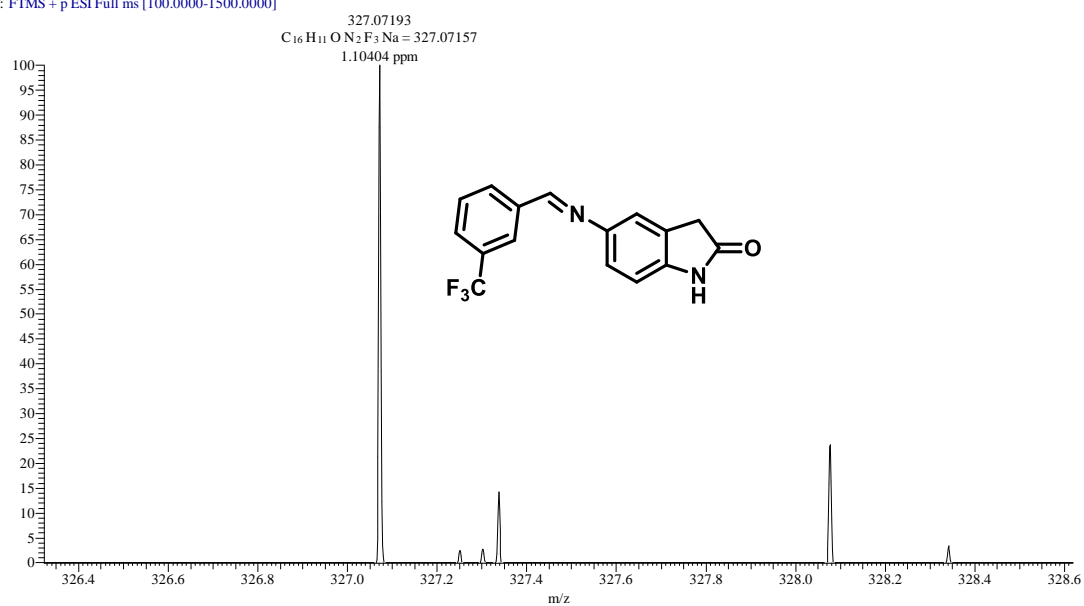

**Figure S32-3.** HRMS of compound **9h**

5-((3,5-bis(trifluoromethyl)benzylidene)amino)indolin-2-one (9i)

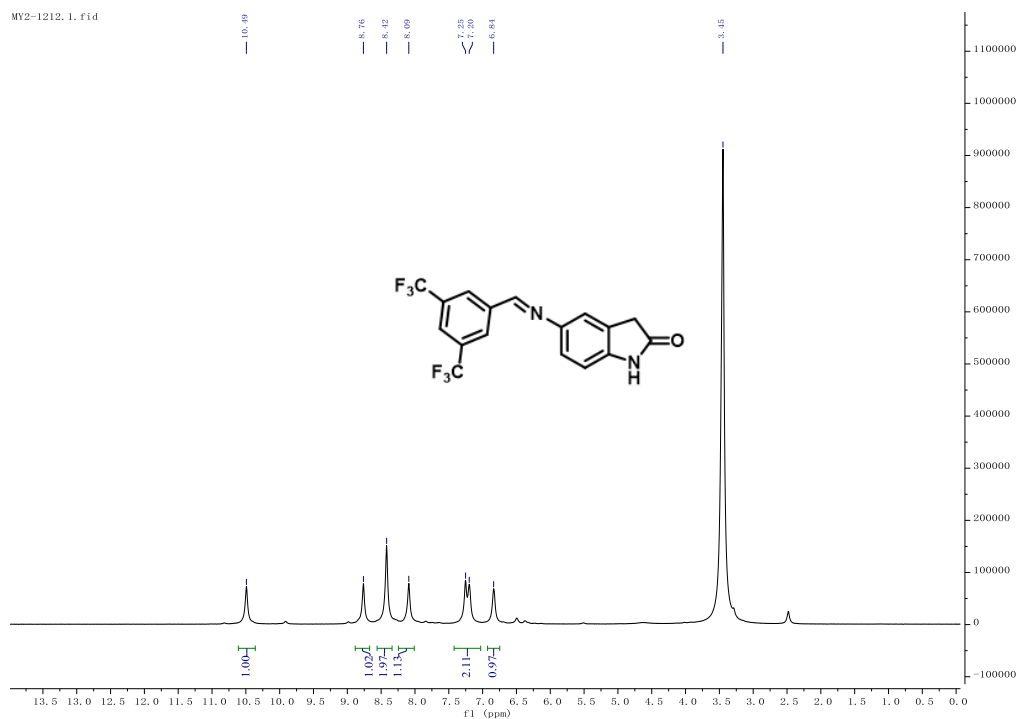

Figure S33-1. <sup>1</sup>H NMR spectrum (600 Hz, DMSO) of compound 9i

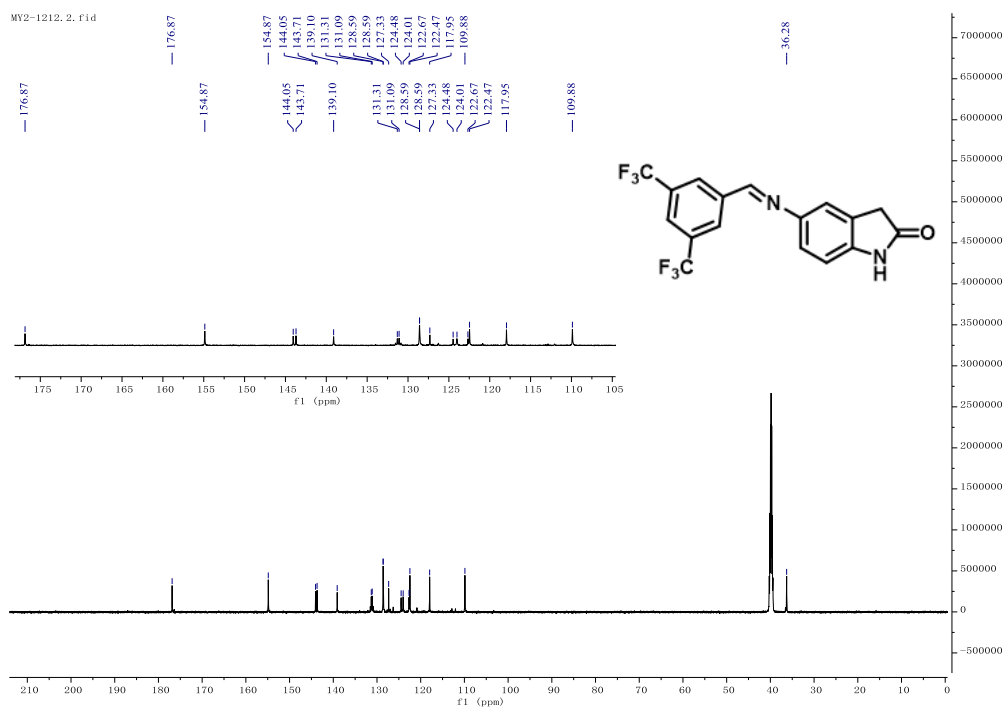

Figure S33-2. <sup>13</sup>C NMR spectrum (150 Hz, DMSO) of compound 9i

MY2 #24 RT: 0.10 AV: 1 NL: 3.75E5  
T: FTMS + p ESI Full ms [100.0000-1500.0000]

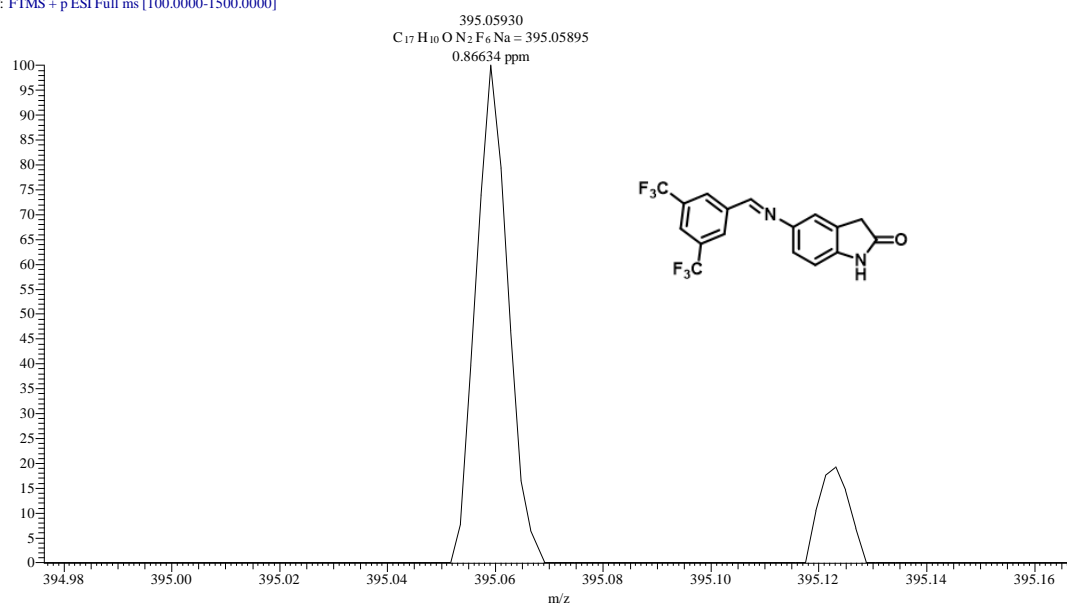

**Figure S33-3.** HRMS of compound 9i
